# Supplementary material for: MEK1/2 inhibition transiently alters the tumor immune microenvironment to enhance immunotherapy efficacy against head and neck cancer
Source: J Immunother Cancer. 2022 Mar 15;10(3):e003917. doi: 10.1136/jitc-2021-003917 (PMC8928405; doi:10.1136/jitc-2021-003917)
Supplement: Supplementary data [file jitc-2021-003917supp003.xlsx]

## Sheet: Table S1
Table S1. Frequently altered MAPK genes after genomics analysis of multiple HNC cohorts
Cohort	% patients with alterations in MAPK pathway
Broad (Stransky et al.)	3
MD Anderson (Pickering et al.)	8
Metastasis MSKCC (Morris et al.)	11
GENIE cohort v9.0 (AACR)	12
Johns Hopkins (Agarwal et al.)	19
TCGA	34
ORCA IN (India ICGC)	64
Frequently altered MAPK Genes	Cohorts in yellow (%)	ORCA IN (%)	GENIE cohort v9.0 (%)	Average (%)
HRAS	6	11.7978	3	6.93258
KRAS	1.5	3.37079	2.1	2.3236
NRAS	1.9	1.1236	1.2	1.40787
ARAF	1.8	1.1236	0.7	1.20787
BRAF	2.2	7.86517	1.9	3.98839
RAF1	1.1	5.05618	1.1	2.41873
MAP2K1	0.6	2.24719	0.5	1.11573
MAP2K2	1.2	1.1236	1.6	1.30787
MAPK1	2.8	3.93258	3	3.24419
MAPK3	0.2	0.561798	1.2	0.653933
RPS6KA1	1.6	1.68539	0	1.09513
SHC1	1.3	3.93258	0	1.74419
SHC2	1.6	2.24719	0	1.2824
SHC3	1.6	5.61798	0	2.40599
SHC4	1.2	3.93258	0	1.71086
GRB2	0.3	2.80899	0	1.03633
DUSP3	0.6	1.1236	0	0.574532
DUSP5	1	1.68539	0	0.895131
DUSP6	1	1.68539	0	0.895131
DUSP7	1	0.561798	0	0.520599
DUSP9	2.8	0.561798	0	1.1206

## Sheet: Table S2
Table S2. Crosstab analysis for MAPK pathway activity groups and clinical as well as histopathological features of the TCGA-HNSC cohort
Feature	Variable	MAPK high	%	MAPK low	%	MAPK moderate	%	p
Gender	Female	33	0.266129	28	0.227642	71	0.28629	0.485
	Male	91	0.733871	95	0.772358	177	0.71371
Age	<61.23	68	0.548387	59	0.479675	120	0.483871	0.445
	>61.23	56	0.451613	64	0.520325	128	0.516129
Smoking	No	23	0.190083	34	0.288136	54	0.219512	0.174
	Yes	98	0.809917	84	0.711864	192	0.780488
Alcohol	No	37	0.305785	47	0.38843	73	0.301653	0.22
	Yes	84	0.694215	74	0.61157	169	0.698347
HPV16	No	119	0.991667	86	0.735043	215	0.914894	5.0945e-10
	Yes	1	0.00833333	31	0.264957	20	0.0851064
Subsite	Hypopharynx	3	0.0241935	2	0.0162602	5	0.0201613	2e-05
	Larynx	24	0.193548	25	0.203252	62	0.25
	Oral cavity	89	0.717742	61	0.495935	154	0.620968
	Oropharynx	8	0.0645161	35	0.284553	27	0.108871
Tumor size	cT1-2	36	0.302521	61	0.504132	76	0.316667	0.000688
	cT3-4	83	0.697479	60	0.495868	164	0.683333
	pT1-2	40	0.363636	55	0.555556	80	0.357143	0.001257
	pT3-4	70	0.636364	44	0.444444	144	0.642857
Lymph nodes	cN0	50	0.42735	61	0.508333	125	0.529661	0.189
	cN+	67	0.57265	59	0.491667	111	0.470339
	pN0	43	0.394495	41	0.445652	84	0.407767	0.748
	pN+	66	0.605505	51	0.554348	122	0.592233
Resection margin	Negative	87	0.731092	80	0.8	172	0.767857	0.623
	Close	15	0.12605	7	0.07	26	0.116071
	Positive	17	0.142857	13	0.13	26	0.116071
Pathological grading	G1-2	96	0.793388	74	0.660714	186	0.765432	0.04417
	G3-4	25	0.206612	38	0.339286	57	0.234568
Angiolymphatic invasion	No	62	0.639175	38	0.567164	116	0.674419	0.298
	Yes	35	0.360825	29	0.432836	56	0.325581
Perineural invasion	No	45	0.459184	45	0.633803	93	0.519553	0.078
	Yes	53	0.540816	26	0.366197	86	0.480447
Ratiotherapy	No	41	0.386792	34	0.320755	75	0.345622	0.592
	Yes	65	0.613208	72	0.679245	142	0.654378
Keck et al 2015	BA	85	0.685484	17	0.138211	87	0.350806	2.8695e-19
	CL	13	0.104839	44	0.357724	96	0.387097
	IMS	26	0.209677	62	0.504065	65	0.262097

## Sheet: Table S3
Table S3. Forest plot summarize hazard ratios (HR) and 95% confidence intervals (95% CI) for tumors of TCGA-HNSC with high MAPK pathway activity

## Sheet: Table S4
Table S4. Frequently altered genes after genomic analysis (MSK-IMPACT) of 4NQOT and 4NQO-L cells.
List of mutations in 4NQO-T cell line			List of mutations in 4NQO-L cell line
Hugo_Symbol	HGVSp		Hugo_Symbol	HGVSp
Notch1	p.Cys272Phe		Trp53	p.Ser364Ile
Notch1	p.Gly1360Cys		Pik3ca	p.Leu877Met
Notch1	p.His316Asn		Notch1	p.Gly367Cys
Kmt2c	p.Gly2114Ter		Notch1	p.Glu989Ter
Spen	p.Lys1020Ter		Kmt2d	p.Met1774Ile
Ros1	p.Gln344His		Kmt2c	p.Gly3801Val
Ros1	p.Gln2065Leu		Ep300	p.Leu1259Val
Ros1	p.Tyr388Ter		Spen	p.Gln3040His
Ros1	p.Arg2035Gln		Ptprd	p.Gly1239Ter
Mgam	p.Arg885His		Mgam	p.Gly418Val
Mgam	p.Thr1435Ile		Epha7	p.Gly565Val
Runx1t1	p.His317Gln		Arid1a	p.Gly1680Val
Mgam	p.Asn1457Lys		Ptprt	p.Ser706Arg
Epha5	p.Arg381Leu		Grin2a	p.Ala732Ser
Arid1a	p.Gly126Ser		Ankrd11	p.Ala553Ser
Ptprt	p.Ser1209Asn		Smg1	p.Ser236Ile
Grin2a	p.Pro686Arg		Ep400	p.Pro1031His
Erbb4	p.Asn62Lys		Ep400	p.Ser341Ile
Arid4a	p.Val983Leu		Zfhx3	p.Glu463Ter
Smg1	p.Met3429Ile		Trp53bp1	p.Gly330Trp
Smg1	p.Asp3621Tyr		Ncor2	p.Leu1875Ile
Ubr5	p.Asp227Asn		Asxl1	p.Pro1387His
Cux1	p.Lys613Asn		Pik3cg	p.Ala85Ser
Zfhx3	p.Arg3048Pro		Arid1b	p.Val858Ile
Asxl1	p.His1237Asn		Cul3	p.Glu574Ter
Prex2	p.His1544Asn		Arid1b	p.Gly828Arg
Prex2	p.Cys1495Phe		Ctcf	p.Glu709Lys
Flt4	p.Arg189Trp		Prex2	p.Glu340Ter
Pdgfra	p.Arg512Gly		Atm	p.Glu2467Lys
Ptch1	p.Asp422Asn		Mdc1	p.Arg1049Ser
Kdr	p.Asp996ThrfsTer3		Mdc1	p.Gly258Val
Kdr	p.Glu1001Asp		Mdc1	p.Gly528Arg
Kdr	p.Ser513Cys		Brip1	p.Leu847Ile
Robo1	p.Asp320Gly		Pbrm1	p.Gly554Ala
Ar	p.Gly723Glu		Pdgfra	p.Val608Phe
Mtor	p.His640Asn		Ptprs	p.Glu864Ter
Hgf	p.Arg495Pro		Flt4	p.Pro948His
Prdm14	p.Pro87Thr		Ptch1	p.Val1256Leu
Rictor	p.Gln510His		Smad4	p.Val474Met
Dtx1	p.Leu243Met		Nf1	p.Met2219Ile
Kdm5c	p.Pro12Thr		Trp63	p.Thr431Lys
Slx4	p.Ser410Ile		Ciita	p.Ser382Thr
Mst1r	p.Glu1317Ter		Inpp4b	p.Gln33His
Notch4	p.Ser830Thr		Robo1	p.Arg1088Gln
Vav1	p.Ala445Asp		Cdkn2a	p.Arg133Lys
Ercc5	p.Tyr1077His		Hgf	p.Arg96Gln
Stk19	p.Arg25Lys		Mga	p.Val1922Ile
Tet1	p.Val566Met		Setd2	p.Gly1749Glu
Vav1	p.Gln817Lys		Mga	p.Ala2852Pro
Ercc5	p.Val939Met		Setd2	p.Ala2012Pro
Etv1	p.Glu473Asp		Gnas	p.Ala105Asp
Pds5b	p.Arg473Leu		Ncoa3	p.Asp356Asn
Bcor	p.Gln416Ter		Axin1	p.Ser622Asn
Ikzf1	p.Glu16Lys		Gnas	p.Thr943Asn
Pik3cb	p.Met5Ile		Vav1	p.Pro607Leu
Lats1	p.Gly671Ter		Nf2	p.Glu408Asp
Tek	p.Gln785His		Setd5	p.Arg767His
Tek	p.Gln1052His		Pds5b	p.His504Asn
Carm1	p.Gly514Arg		Ago2	p.Val165Ile
Ikzf3	p.Lys360Asn		Irs2	p.Gly493Ser
Ikzf3	p.Arg301Gly		Ctnnb1	p.His578Gln
Pms1	p.Ala162Ser		Esr1	p.Pro556Gln
Tek	p.Trp335Cys		Ezh2	p.Gly79Arg
Bcl11b	p.Gln197His		Sp140	p.Gly3Arg
Inhba	p.Gly314Ser		Tnfaip3	p.Asp344His
Tshr	p.Leu75Met		Parp1	p.Gln242Arg
Wt1	p.Met392Ile		Blm	p.Leu800Phe
Fgfr2	p.Ile715Phe		Cysltr2	p.Ala224Gly
Rps6ka4	p.Glu436Lys		Hnf1a	p.Pro83Ser
Csf3r	p.Gln501His		Smad2	p.Gln407His
Fgfr2	p.Glu714Asp		Prkar1a	p.Gly168Asp
Tap2	p.Leu158Arg		Rbm10	p.Gly10Arg
Arid5a	p.Gly198Trp		Rac2	p.Gly12Ter
Irs1	p.Leu922Ile		Tert	p.Glu407Ter
Sox17	p.His132Tyr		Tshr	p.Leu92Met
Msi1	p.Pro315Ser		Ppp2r1a	p.Met245Ile
Gata2	p.Arg343Ile		Nf1	p.Lys920Asn
Kras	p.Gly12Ala		Smc1a	p.Asp886Asn
Cd276	p.Glu198Ter		Rnf43	p.Cys719Tyr
Pot1a	p.Phe106Tyr		Tcf3	p.Ala39Ser
Whsc1	p.Trp931Cys		Msi1	p.Ala335Pro
Lor	p.Gly135Arg		Sesn1	p.Gly308Ser
Lmo3	p.Gly48Val		Setdb2	p.Ala52Ser
Fev	p.Glu89Asp		Max	p.Ser45Ile
Gm10093	p.Gly6Ser		Kras	p.Gly12Cys
Pds5a	p.Gln524His		Tgfbr1	p.Gly353Ter
Nkx2-4	p.Phe154Leu		Max	p.Arg36Ser
Dusp1	p.Leu17Pro		Dusp4	p.Gly287Ser
Foxl2	p.Pro289Thr		Pdcd1	p.Gly85Asp
Pfpl	p.Arg274Met		Fgfr1	p.Ala575Ser
Sox1	p.Gly40Cys		Tgfbr1	p.Cys37Phe
			Traf7	p.Arg231Leu
			Aurka	p.Trp141Ter
			Cdk6	p.Arg288Thr
			Tgfbr1	p.Asp100Tyr
			Mre11a	p.Ala679Ser
			Pot1a	p.Ala453Ser
			Esco1	p.Arg782Gln
			Cdkn1a	p.Gln42Lys
			Plk1	p.Asp457Tyr
			Dnah6	p.Glu1602Asp
			Psmb9	p.Ala4Val
			Olfr1457	p.Val92Phe

## Sheet: Table S6
Table S6. Differential expression between 4NQOT/L with their corresponding 4NQO-T-PE and 4NQO-L-PE cells.
GeneID	Base mean	log2(FC)	StdErr	Wald-Stats	P-value	P-adj
Krt7	1928.15	9.31196	0.435755	21.3697	2.56e-101	1.82e-97
Lad1	580.381	8.738	0.582197	15.0087	6.44e-51	5.11e-48
Mal	216.832	8.58483	0.758714	11.315	1.11e-29	3.04e-27
Krt90	350.431	8.52084	0.649266	13.1238	2.41e-39	1.07e-36
Gpx2	329.152	8.5057	0.636122	13.3712	8.91e-41	4.71e-38
Krt8-ps	266.706	8.42357	0.703658	11.9711	5.04e-33	1.63e-30
Krt8	304.226	8.4061	0.63686	13.1993	8.86e-40	4.36e-37
Fermt1	388.36	8.2769	0.56816	14.5679	4.5e-48	3.21e-45
Ppbp	517.514	8.24683	0.545112	15.1287	1.05e-51	9.34e-49
Ltf	234.57	8.22793	0.71325	11.5358	8.7e-31	2.59e-28
Fgfbp1	483.286	8.20386	0.529629	15.4898	4.06e-54	4.14e-51
Rab25	245.71	8.05304	0.659639	12.2083	2.81e-34	1e-31
Spint1	130.484	7.96037	0.778637	10.2235	1.56e-24	2.81e-22
St14	132.055	7.93738	0.783041	10.1366	3.8e-24	6.6e-22
Moxd1	126.794	7.92623	0.779646	10.1664	2.8e-24	4.93e-22
Tmem98	122.559	7.85507	0.784862	10.0082	1.4e-23	2.27e-21
Calcb	246.305	7.8122	0.624606	12.5074	6.8e-36	2.69e-33
Afap1l1	117.916	7.81068	0.786072	9.93635	2.89e-23	4.44e-21
Igf2bp2	315.565	7.7974	0.552483	14.1134	3.14e-45	1.87e-42
Dy0p	2911.81	7.79494	0.759929	10.2575	1.1e-24	2.03e-22
Prss22	127.432	7.77822	0.799003	9.73492	2.14e-22	3.02e-20
Cldn4	386.156	7.75417	0.513039	15.1142	1.31e-51	1.1e-48
Cldn3	178.346	7.67265	0.659986	11.6255	3.06e-31	9.29e-29
Il24	141.297	7.66653	0.715096	10.721	8.11e-27	1.63e-24
Esrp1	235.011	7.57259	0.586595	12.9094	3.98e-38	1.72e-35
Il1a	127.821	7.48987	0.728462	10.2818	8.51e-25	1.6e-22
Myo1d	208.245	7.42251	0.585389	12.6796	7.67e-37	3.22e-34
Cwh43	87.9889	7.3892	0.806917	9.15733	5.32e-20	6.22e-18
Mal2	114.722	7.34015	0.733563	10.0062	1.43e-23	2.3e-21
Grb7	82.393	7.31834	0.80858	9.05086	1.42e-19	1.63e-17
Ap1m2	81.4729	7.30725	0.808744	9.0353	1.64e-19	1.87e-17
Il33	81.9469	7.28257	0.812544	8.96268	3.17e-19	3.28e-17
Plekhs1	80.0281	7.27445	0.810952	8.97026	2.96e-19	3.1e-17
Krt18	704.927	7.24276	0.390198	18.5618	6.55e-77	1.34e-73
Slco4a1	77.0256	7.2375	0.811536	8.91828	4.74e-19	4.83e-17
Plac8	545.718	7.19393	0.868176	8.28626	1.17e-16	8.55e-15
Rbm47	201.872	7.13311	0.584971	12.1939	3.35e-34	1.16e-31
Lypd3	98.7604	7.05201	0.758022	9.30317	1.36e-20	1.66e-18
Duox1	88.4005	6.9805	0.748456	9.32654	1.09e-20	1.36e-18
Acsbg1	129.854	6.97637	0.637905	10.9364	7.72e-28	1.77e-25
Ptpn6	64.9967	6.95924	0.828412	8.40071	4.44e-17	3.64e-15
Elf3	67.4548	6.95885	0.83238	8.36018	6.26e-17	4.88e-15
Pdzk1ip1	68.6956	6.9574	0.834409	8.33812	7.55e-17	5.76e-15
Enpp1	60.0928	6.91996	0.824983	8.38801	4.94e-17	4.03e-15
Myh14	103.71	6.91208	0.688366	10.0413	1e-23	1.65e-21
Elovl7	59.4348	6.90657	0.825477	8.36677	5.92e-17	4.64e-15
Egln3	113.047	6.89058	0.715241	9.63393	5.75e-22	7.89e-20
Tnip3	58.821	6.88035	0.82776	8.31202	9.41e-17	7.06e-15
Upp1	313.59	6.87021	0.469153	14.6439	1.47e-48	1.11e-45
Ngfr	86.5522	6.86281	0.765841	8.96114	3.21e-19	3.3e-17
Krt6a	6674.1	6.79762	0.352434	19.2877	6.82e-83	2.43e-79
Krt6b	757.027	6.76223	0.919533	7.35398	1.92e-13	9.77e-12
Gm6637	54.5666	6.75912	0.835095	8.09384	5.78e-16	3.98e-14
Wnt7a	74.5743	6.75249	0.757577	8.91327	4.95e-19	4.94e-17
Prss12	92.2093	6.74642	0.696687	9.68358	3.54e-22	4.95e-20
Hs3st1	54.4971	6.74446	0.836949	8.05839	7.73e-16	5.28e-14
Pla1a	54.8001	6.73702	0.838434	8.03525	9.34e-16	6.34e-14
Kdf1	127.513	6.70922	0.617551	10.8642	1.71e-27	3.75e-25
Slitrk6	52.8361	6.69461	0.840006	7.96971	1.59e-15	1.04e-13
Trp53i11	51.022	6.68218	0.837804	7.97582	1.51e-15	9.91e-14
Gm29695	87.3122	6.66651	0.69948	9.53068	1.56e-21	2.12e-19
Ppfibp2	50.2437	6.62694	0.843303	7.85832	3.89e-15	2.48e-13
Ccdc68	47.6776	6.58446	0.84312	7.80964	5.74e-15	3.57e-13
Slit2	48.4056	6.57729	0.845538	7.77882	7.32e-15	4.54e-13
Lcn2	50.4443	6.53953	0.85439	7.65403	1.95e-14	1.13e-12
Crb3	48.7661	6.52642	0.852723	7.65362	1.95e-14	1.13e-12
Mmrn2	126.553	6.4938	0.598188	10.8558	1.87e-27	4.05e-25
Psapl1	50.6645	6.47471	0.86257	7.5063	6.08e-14	3.26e-12
B4galnt3	46.3986	6.46222	0.855683	7.55211	4.28e-14	2.36e-12
Blnk	59.817	6.45683	0.770827	8.3765	5.45e-17	4.37e-15
Etv5	162.752	6.44308	0.586056	10.994	4.09e-28	9.85e-26
Ceacam1	66.019	6.43674	0.791597	8.13133	4.25e-16	3.03e-14
Krt19	148.932	6.43593	0.617424	10.4238	1.93e-25	3.67e-23
Acp5	59.7841	6.42699	0.775142	8.29136	1.12e-16	8.35e-15
Fam83f	47.281	6.41325	0.863274	7.42899	1.09e-13	5.76e-12
Prxl2a	88.4851	6.38682	0.673574	9.48198	2.5e-21	3.33e-19
Pde3b	41.7682	6.38032	0.855365	7.45917	8.71e-14	4.62e-12
Rbpms	44.9941	6.38029	0.862672	7.39596	1.4e-13	7.26e-12
Stc2	41.882	6.37317	0.856514	7.44082	1e-13	5.29e-12
Cblc	41.1504	6.35813	0.856511	7.42329	1.14e-13	5.99e-12
Vcan	93.4872	6.34243	0.705626	8.98838	2.51e-19	2.73e-17
Bpifb3	43.8032	6.32705	0.866436	7.30238	2.83e-13	1.41e-11
Slco2a1	252.89	6.31034	0.445977	14.1495	1.88e-45	1.17e-42
Il1rn	700.701	6.27695	0.326612	19.2184	2.6e-82	7.41e-79
Tmprss11g	42.1038	6.27304	0.869158	7.21737	5.3e-13	2.55e-11
Arg1	72.9306	6.2607	0.746675	8.38477	5.08e-17	4.12e-15
Spp1	334.098	6.24607	0.440538	14.1783	1.25e-45	8.1e-43
Sult2b1	38.1471	6.21887	0.866323	7.17846	7.05e-13	3.32e-11
Gpr85	37.823	6.21051	0.866561	7.16685	7.67e-13	3.59e-11
Add2	67.2451	6.20786	0.737702	8.41513	3.92e-17	3.24e-15
Rgs16	37.176	6.19728	0.866566	7.15154	8.58e-13	4e-11
Itga2	37.8262	6.18975	0.868974	7.12305	1.06e-12	4.89e-11
Tmigd1	36.2555	6.16796	0.867652	7.1088	1.17e-12	5.35e-11
Krtdap	41.4583	6.16541	0.880297	7.00379	2.49e-12	1.1e-10
Cxcl2	40.0163	6.1516	0.878857	6.99955	2.57e-12	1.13e-10
Rgs5	61.9461	6.14968	0.728108	8.44611	3.01e-17	2.51e-15
Fxyd2	36.9863	6.14349	0.872492	7.04132	1.9e-12	8.52e-11
Ccbe1	60.3959	6.13708	0.725637	8.4575	2.73e-17	2.31e-15
Atp2c2	35.2271	6.11609	0.871344	7.01915	2.23e-12	9.86e-11
Tspan1	34.1318	6.1111	0.868824	7.03376	2.01e-12	8.95e-11
Dusp4	33.3057	6.08208	0.870072	6.99032	2.74e-12	1.2e-10
Parvb	45.4797	6.0811	0.788471	7.71252	1.23e-14	7.43e-13
Erbb3	33.6572	6.04587	0.875572	6.90505	5.02e-12	2.13e-10
Cda	97.6815	6.04006	0.645513	9.35699	8.2e-21	1.04e-18
Fcmr	32.7045	6.01428	0.876586	6.86103	6.84e-12	2.86e-10
Nr2f1	42.6836	5.99633	0.792266	7.56858	3.77e-14	2.11e-12
Cxcl5	81.3774	5.98878	0.666657	8.9833	2.63e-19	2.82e-17
Spry1	31.7216	5.98668	0.877189	6.82485	8.8e-12	3.66e-10
Slpi	696.185	5.98647	0.391215	15.3023	7.38e-53	7.02e-50
Ctsh	414.343	5.98058	0.74681	8.00817	1.16e-15	7.69e-14
Adam12	43.1671	5.97918	0.796153	7.51009	5.91e-14	3.19e-12
Cers3	31.1033	5.96357	0.878101	6.79143	1.11e-11	4.53e-10
Mcpt8	78.4498	5.94965	0.663571	8.96612	3.07e-19	3.2e-17
Sox15	36.8573	5.9441	0.895149	6.64035	3.13e-11	1.22e-09
Ccl2	173.116	5.94201	0.587682	10.1109	4.94e-24	8.29e-22
Il23a	31.3525	5.93551	0.882311	6.72723	1.73e-11	6.99e-10
Slc26a9	31.9719	5.92905	0.884774	6.70121	2.07e-11	8.24e-10
Mycn	29.7588	5.91347	0.880081	6.71923	1.83e-11	7.36e-10
2210016F16Rik	29.6462	5.90879	0.88029	6.71232	1.92e-11	7.7e-10
Csf3	53.3831	5.89778	0.747966	7.8851	3.14e-15	2.01e-13
Nbl1	148.472	5.89347	0.515521	11.4321	2.89e-30	8.42e-28
Lpar5	28.9766	5.83755	0.886737	6.58318	4.6e-11	1.74e-09
Nipal2	29.6318	5.83237	0.889349	6.55803	5.45e-11	2.06e-09
Aldh1a3	60.301	5.78286	0.712291	8.11867	4.71e-16	3.33e-14
Kcnk1	48.87	5.76058	0.760553	7.57419	3.61e-14	2.03e-12
Rab15	26.8328	5.75875	0.889313	6.4755	9.45e-11	3.47e-09
Sel1l3	47.5145	5.75322	0.751577	7.65486	1.94e-14	1.13e-12
Clca2	26.1264	5.70487	0.893377	6.38574	1.71e-10	6.11e-09
Prss27	25.9281	5.69039	0.894433	6.36201	1.99e-10	7.07e-09
Fam122a	25.8114	5.68453	0.894689	6.35363	2.1e-10	7.44e-09
Ankrd22	35.4841	5.68399	0.816052	6.96523	3.28e-12	1.42e-10
P2ry2	45.291	5.67985	0.757781	7.49537	6.61e-14	3.53e-12
Psca	639.665	5.66164	0.972974	5.8189	5.92e-09	1.7e-07
S100a14	674.086	5.65194	0.350185	16.1399	1.34e-58	1.59e-55
Tslp	164.278	5.64103	0.503752	11.198	4.17e-29	1.08e-26
Hmga2	2392.68	5.62042	0.787057	7.14106	9.26e-13	4.3e-11
Eva1c	43.9804	5.61797	0.763281	7.36029	1.84e-13	9.38e-12
5730409E04Rik	24.4014	5.60943	0.898612	6.24233	4.31e-10	1.49e-08
Slc4a11	356.708	5.60203	0.424785	13.1879	1.03e-39	4.9e-37
Abcg2	106.467	5.59932	0.56928	9.83579	7.89e-23	1.19e-20
Tph1	760.725	5.59888	0.734781	7.6198	2.54e-14	1.45e-12
Pglyrp3	25.3177	5.5871	0.904304	6.17834	6.48e-10	2.21e-08
Barx2	29.5042	5.58642	0.91637	6.09625	1.09e-09	3.57e-08
Ano3	23.9585	5.56196	0.90266	6.16175	7.19e-10	2.44e-08
Scgb2b27	25.5192	5.55638	0.908445	6.11637	9.57e-10	3.18e-08
Lcp1	23.4954	5.55367	0.901966	6.1573	7.4e-10	2.5e-08
Tmprss11e	23.4084	5.52973	0.904496	6.11361	9.74e-10	3.22e-08
Mycl	23.5468	5.52523	0.905441	6.10226	1.05e-09	3.45e-08
Ifi209	23.4126	5.525	0.904953	6.10528	1.03e-09	3.39e-08
Gzme	33.1661	5.52342	0.833353	6.62795	3.4e-11	1.32e-09
Slc39a4	931.019	5.52144	0.328291	16.8187	1.78e-63	2.82e-60
Phlda2	48.8234	5.50858	0.720823	7.64206	2.14e-14	1.23e-12
Rbp4	39.8052	5.4741	0.771271	7.0975	1.27e-12	5.77e-11
Marveld2	22.9736	5.47094	0.909685	6.0141	1.81e-09	5.67e-08
Trex2	22.7786	5.46382	0.90974	6.00591	1.9e-09	5.94e-08
Sprr2a3	25.3024	5.45122	0.919368	5.92931	3.04e-09	9.16e-08
Ivl	72.3667	5.45075	0.644449	8.458	2.72e-17	2.31e-15
Vwa2	22.1138	5.43758	0.910281	5.97352	2.32e-09	7.15e-08
Susd2	22.4715	5.42952	0.912454	5.95046	2.67e-09	8.12e-08
Entpd3	76.731	5.37962	0.617811	8.70754	3.11e-18	2.86e-16
Tmem30b	21.6289	5.35982	0.917385	5.8425	5.14e-09	1.49e-07
Mab21l4	24.3293	5.34574	0.927509	5.76355	8.24e-09	2.3e-07
Bpifb4	22.401	5.34376	0.921724	5.79757	6.73e-09	1.91e-07
Chr01	24.4361	5.33916	0.928423	5.75078	8.88e-09	2.47e-07
Wfdc18	20.6068	5.32457	0.917395	5.80401	6.47e-09	1.85e-07
Map3k5	73.3853	5.32041	0.618152	8.60696	7.5e-18	6.61e-16
Sting1	27.7201	5.31013	0.838299	6.33441	2.38e-10	8.37e-09
Sowahb	20.068	5.3099	0.917008	5.79046	7.02e-09	1.98e-07
Pcdh1	29.2634	5.30702	0.848283	6.2562	3.94e-10	1.37e-08
Chst1	20.0907	5.28493	0.919896	5.74514	9.18e-09	2.54e-07
Sox13	55.6535	5.28249	0.658083	8.02709	9.98e-16	6.72e-14
U90926	37.3735	5.26321	0.890603	5.90972	3.43e-09	1.02e-07
L1cam	19.9358	5.25422	0.922626	5.69485	1.23e-08	3.36e-07
Galnt3	28.5285	5.25268	0.855685	6.13857	8.33e-10	2.79e-08
Csta1	26.557	5.21409	0.848242	6.14694	7.9e-10	2.65e-08
Sdcbp2	33.1679	5.20715	0.788635	6.60274	4.04e-11	1.55e-09
Rab17	18.5824	5.19798	0.92357	5.62814	1.82e-08	4.82e-07
Slc6a14	18.6491	5.18993	0.924765	5.61217	2e-08	5.26e-07
Tns4	1041.09	5.17411	0.358452	14.4346	3.13e-47	2.13e-44
Lemd1	18.3288	5.16985	0.925624	5.58527	2.33e-08	6.1e-07
Mctp2	18.4839	5.16968	0.926368	5.58059	2.4e-08	6.25e-07
Gm16136	18.2092	5.16168	0.926064	5.57378	2.49e-08	6.49e-07
Akr1c18	19.156	5.15788	0.93027	5.54449	2.95e-08	7.58e-07
Pycard	18.2219	5.15323	0.927002	5.55902	2.71e-08	7.02e-07
Rnf152	25.1724	5.14615	0.851217	6.04564	1.49e-09	4.75e-08
Slitrk2	17.9827	5.12567	0.929097	5.51683	3.45e-08	8.76e-07
Prss8	17.9326	5.11895	0.929598	5.50663	3.66e-08	9.27e-07
Pof1b	18.139	5.11005	0.931468	5.48602	4.11e-08	1.03e-06
S100a8	17.7706	5.08796	0.932243	5.45776	4.82e-08	1.19e-06
Odaph	18.2617	5.08051	0.935132	5.43293	5.54e-08	1.35e-06
Cac02d1	19.426	5.07824	0.93943	5.40566	6.46e-08	1.56e-06
Gm35551	17.457	5.07746	0.932168	5.44693	5.12e-08	1.26e-06
Dhh	17.2091	5.07539	0.931328	5.44963	5.05e-08	1.24e-06
C1qtnf1	23.3004	5.06315	0.852529	5.93897	2.87e-09	8.67e-08
Cdh1	1016.61	5.05055	0.933654	5.40945	6.32e-08	1.53e-06
Plet1	106.017	5.05034	0.559307	9.02964	1.72e-19	1.93e-17
Gda	82.7624	5.04742	0.606286	8.32514	8.42e-17	6.39e-15
Plscr1	23.0486	5.04415	0.854368	5.90395	3.55e-09	1.05e-07
Endou	16.8302	5.03537	0.93406	5.39085	7.01e-08	1.69e-06
Wfdc2	8543.17	5.03494	0.377243	13.3467	1.24e-40	6.31e-38
Sftpd	22.5714	5.03149	0.854931	5.88527	3.97e-09	1.17e-07
Evpl	78.9145	5.02212	0.651276	7.7112	1.25e-14	7.47e-13
Gpa33	17.5122	5.00747	0.939821	5.32811	9.92e-08	2.35e-06
Oasl1	17.9894	4.98511	0.943815	5.28187	1.28e-07	2.95e-06
Myo5b	16.924	4.97737	0.940648	5.29143	1.21e-07	2.82e-06
Scn5a	16.3232	4.96824	0.93902	5.29087	1.22e-07	2.83e-06
5830416I19Rik	16.6709	4.96701	0.940512	5.28118	1.28e-07	2.96e-06
I0va	173.575	4.95541	0.850599	5.8258	5.68e-09	1.63e-07
Clca3b	16.5582	4.94548	0.942443	5.24751	1.54e-07	3.5e-06
Flywch2	27.9935	4.93852	0.807312	6.11724	9.52e-10	3.17e-08
Grhl2	34.3106	4.93808	0.765326	6.45226	1.1e-10	4.01e-09
Wscd1	16.8713	4.93039	0.945153	5.2165	1.82e-07	4.09e-06
Cxadr	117.964	4.91499	0.516095	9.52343	1.68e-21	2.26e-19
Megf10	21.0602	4.9078	0.865286	5.67188	1.41e-08	3.79e-07
Cds1	15.4527	4.90443	0.94198	5.20651	1.92e-07	4.29e-06
Nkx2-9	39.6586	4.9039	0.739967	6.62719	3.42e-11	1.33e-09
Zfp618	16.4581	4.89956	0.946679	5.17552	2.27e-07	4.97e-06
Il11	61.7503	4.89044	0.633337	7.72171	1.15e-14	6.97e-13
Armcx2	16.7907	4.88923	0.948872	5.15268	2.57e-07	5.57e-06
Ly6c2	39.4934	4.87833	0.744129	6.55576	5.54e-11	2.08e-09
Saa3	15.232	4.87405	0.9442	5.16209	2.44e-07	5.32e-06
Ovol2	15.5182	4.86484	0.946448	5.1401	2.75e-07	5.91e-06
Wnt7b	448.093	4.83268	0.80289	6.0191	1.75e-09	5.51e-08
Epha7	161.341	4.82135	0.45026	10.7079	9.34e-27	1.85e-24
Hhip	46.3616	4.82035	0.667946	7.21669	5.33e-13	2.55e-11
Gjb2	14.645	4.81984	0.947179	5.08862	3.61e-07	7.56e-06
Khdrbs3	20.7822	4.80729	0.878499	5.47216	4.45e-08	1.11e-06
Nectin3	14.7235	4.80352	0.949229	5.06045	4.18e-07	8.69e-06
Dusp9	52.2015	4.76973	0.678139	7.03356	2.01e-12	8.95e-11
Nfkbie	14.9259	4.76957	0.953364	5.00288	5.65e-07	1.14e-05
Nkd2	221.602	4.7498	0.92296	5.14627	2.66e-07	5.73e-06
F2rl1	112.012	4.73197	0.538113	8.79364	1.45e-18	1.39e-16
Alcam	29.5474	4.73008	0.77765	6.08253	1.18e-09	3.87e-08
Ifi202b	14.6593	4.72939	0.956408	4.94495	7.62e-07	1.49e-05
Smagp	14.0125	4.72703	0.953775	4.95613	7.19e-07	1.42e-05
Lrch2	14.3659	4.71542	0.956544	4.92964	8.24e-07	1.61e-05
Tmprss4	14.7957	4.71537	0.958285	4.92063	8.63e-07	1.68e-05
Eya2	89.2183	4.71522	0.562956	8.37582	5.48e-17	4.37e-15
Il13ra1	18.8392	4.70512	0.880857	5.34153	9.22e-08	2.19e-06
Jph1	13.9541	4.70249	0.956024	4.9188	8.71e-07	1.69e-05
Slc16a3	199.027	4.67324	0.434266	10.7612	5.25e-27	1.08e-24
Cnfn	16.4108	4.63068	0.971489	4.76658	1.87e-06	3.39e-05
Tincr	13.2846	4.63063	0.960011	4.82352	1.41e-06	2.64e-05
Rnf128	71.2853	4.62653	0.600463	7.70494	1.31e-14	7.81e-13
Slc16a2	27.0811	4.6171	0.77911	5.92611	3.1e-09	9.29e-08
Cldn2	13.2462	4.61173	0.961636	4.79571	1.62e-06	2.99e-05
Clstn2	15.919	4.61093	0.971605	4.74569	2.08e-06	3.71e-05
Tmprss11b	15.8353	4.60717	0.971737	4.74117	2.12e-06	3.79e-05
Tnfrsf26	13.1578	4.60433	0.962081	4.7858	1.7e-06	3.11e-05
Mpzl2	331.402	4.60006	0.330116	13.9347	3.9e-44	2.14e-41
Serpinb2	72.1213	4.59689	0.619523	7.42005	1.17e-13	6.12e-12
Morn4	17.5903	4.5854	0.890259	5.15063	2.6e-07	5.61e-06
Colca2	13.0565	4.57724	0.964209	4.74715	2.06e-06	3.7e-05
Crisp1	13.2816	4.56175	0.966653	4.71912	2.37e-06	4.16e-05
Oit1	13.6162	4.55723	0.968381	4.70603	2.53e-06	4.38e-05
Bcl11a	13.2902	4.55619	0.967115	4.71111	2.46e-06	4.29e-05
Lce1h	13.0196	4.55141	0.966403	4.70964	2.48e-06	4.31e-05
S100a9	12.4827	4.54955	0.96419	4.71852	2.38e-06	4.16e-05
Sh3gl2	17.0247	4.54672	0.891801	5.09836	3.43e-07	7.21e-06
Flt4	12.5682	4.54644	0.964855	4.71205	2.45e-06	4.27e-05
Parp16	12.3759	4.53552	0.96502	4.69992	2.6e-06	4.5e-05
Mfsd2a	29.2858	4.52063	0.744009	6.07604	1.23e-09	4.02e-08
Wipf3	12.4501	4.51375	0.967403	4.66584	3.07e-06	5.24e-05
Il17rd	16.3065	4.50692	0.894289	5.03967	4.66e-07	9.54e-06
Pnp2	29.3541	4.50544	0.748537	6.019	1.75e-09	5.51e-08
Tgfa	68.2373	4.49761	0.59174	7.60066	2.95e-14	1.67e-12
Syt16	12.1307	4.48015	0.969209	4.62248	3.79e-06	6.35e-05
Pdgfd	11.9727	4.48009	0.968485	4.62588	3.73e-06	6.26e-05
Sprr3	113.166	4.47326	0.895745	4.9939	5.92e-07	1.19e-05
3300005D01Rik	29.6759	4.46924	0.771235	5.79491	6.84e-09	1.93e-07
Nnmt	11.9757	4.46556	0.969753	4.60484	4.13e-06	6.88e-05
Gng11	11.7705	4.45979	0.969403	4.60056	4.21e-06	7.01e-05
Tmprss2	12.491	4.45342	0.973257	4.57579	4.74e-06	7.82e-05
Etv4	87.0207	4.44514	0.5863	7.58167	3.41e-14	1.93e-12
St6gal1	47.9234	4.43838	0.691971	6.41411	1.42e-10	5.1e-09
Pinlyp	13.2331	4.43315	0.977846	4.53359	5.8e-06	9.41e-05
Bspry	17.8191	4.42029	0.918517	4.81242	1.49e-06	2.77e-05
Calca	12.7131	4.40817	0.978059	4.50706	6.57e-06	0.00010555
Eya1	27.5123	4.38726	0.7669	5.72077	1.06e-08	2.9e-07
Unc13b	24.3633	4.3792	0.812592	5.38917	7.08e-08	1.7e-06
Grik3	11.1821	4.36892	0.975073	4.48061	7.44e-06	0.000118507
Ly6c1	5031.46	4.36487	0.331795	13.1553	1.59e-39	7.3e-37
Zfpm2	35.0375	4.35157	0.718921	6.05292	1.42e-09	4.56e-08
Tnnt2	371.642	4.35084	0.961722	4.52401	6.07e-06	9.81e-05
Krt76	12.2202	4.34346	0.981718	4.42434	9.67e-06	0.000148872
Tmem200a	11.0126	4.33991	0.976907	4.4425	8.89e-06	0.000139245
Map7	34.4216	4.33797	0.715407	6.06364	1.33e-09	4.29e-08
Mettl7b	11.1436	4.33795	0.977646	4.43714	9.12e-06	0.000141514
Tuba8	10.9285	4.33693	0.976754	4.44014	8.99e-06	0.000139859
Gm4798	11.2861	4.33575	0.978438	4.43129	9.37e-06	0.00014525
Mst1r	11.2719	4.33371	0.978657	4.42823	9.5e-06	0.000147168
Mapk12	15.2284	4.3312	0.910931	4.75469	1.99e-06	3.59e-05
Ildr1	11.2564	4.32114	0.979647	4.41092	1.03e-05	0.000157388
Ocln	14.4805	4.31825	0.905856	4.76703	1.87e-06	3.39e-05
Exo5	15.0003	4.31303	0.914251	4.71756	2.39e-06	4.17e-05
Cystm1	69.7721	4.31066	0.66106	6.52084	6.99e-11	2.59e-09
Nm0t2	14.392	4.30477	0.90948	4.73322	2.21e-06	3.92e-05
Pdlim2	112.838	4.29609	0.518417	8.28694	1.16e-16	8.54e-15
Unc13d	14.5587	4.28503	0.91219	4.69753	2.63e-06	4.54e-05
Cp	197.021	4.26406	0.38994	10.9352	7.83e-28	1.77e-25
Epcam	554.814	4.26368	1.01431	4.20353	2.63e-05	0.000362554
Acox2	11.2081	4.2624	0.984398	4.32995	1.49e-05	0.000219798
Pbp2	17.5877	4.25774	0.853859	4.98647	6.15e-07	1.23e-05
Stard10	360.503	4.25111	0.373989	11.3669	6.11e-30	1.71e-27
Grhl1	23.6081	4.24601	0.838637	5.063	4.13e-07	8.58e-06
Gm4983	10.4956	4.24562	0.98274	4.32019	1.56e-05	0.000227406
Slc45a3	10.2961	4.24211	0.98218	4.31907	1.57e-05	0.000228322
S1pr1	11.3999	4.24138	0.987063	4.29697	1.73e-05	0.000249507
2610524H06Rik	41.4226	4.23862	0.712046	5.95274	2.64e-09	8.02e-08
Cck	10.3418	4.23176	0.983279	4.30372	1.68e-05	0.000243184
Ano9	10.5298	4.22765	0.984432	4.29451	1.75e-05	0.000251531
Hmga1b	36.5535	4.22468	0.704245	5.99888	1.99e-09	6.19e-08
Prss16	25.3773	4.21428	0.785103	5.3678	7.97e-08	1.9e-06
Slc25a13	76.7102	4.19652	0.556163	7.54548	4.51e-14	2.47e-12
Bicdl2	17.3258	4.18942	0.863576	4.85125	1.23e-06	2.33e-05
Sfrp1	28.9264	4.18866	0.762548	5.49298	3.95e-08	9.93e-07
Trib2	170.965	4.18606	0.885769	4.72591	2.29e-06	4.03e-05
Adgra1	10.3416	4.18461	0.987292	4.23847	2.25e-05	0.000316309
Hunk	63.1285	4.17072	0.612221	6.81244	9.6e-12	3.97e-10
Rgs4	31.7135	4.16265	0.736514	5.65182	1.59e-08	4.23e-07
Cd53	9.97406	4.14957	0.988591	4.19746	2.7e-05	0.000370629
Acvrl1	16.7235	4.14153	0.865995	4.7824	1.73e-06	3.15e-05
Uqcrc1	24.8067	4.13754	0.875327	4.72685	2.28e-06	4.02e-05
Pdlim4	17.2394	4.13746	0.873566	4.73629	2.18e-06	3.87e-05
Apbb1ip	47.8599	4.13408	0.637911	6.48066	9.13e-11	3.36e-09
Spns3	10.2047	4.13139	0.991112	4.16844	3.07e-05	0.000415511
Zfp459	9.88879	4.13123	0.989751	4.17401	2.99e-05	0.00040702
Lor	10.0922	4.12215	0.991368	4.15804	3.21e-05	0.000431594
Cdk3	9.88593	4.11962	0.990589	4.15876	3.2e-05	0.000431466
Sostdc1	2545.2	4.11657	0.251445	16.3717	3.05e-60	4.35e-57
Tmem37	20.0496	4.11641	0.832455	4.94491	7.62e-07	1.49e-05
D0af3	9.74755	4.11136	0.990747	4.14976	3.33e-05	0.000445823
Gm41331	48.3129	4.11071	0.721637	5.69637	1.22e-08	3.33e-07
Lif	48.3047	4.10633	0.770337	5.33056	9.79e-08	2.32e-06
Cdc42ep5	9.76615	4.10268	0.991479	4.13794	3.5e-05	0.000466353
Gm20544	16.2933	4.09796	0.869889	4.7109	2.47e-06	4.29e-05
Adssl1	16.4683	4.09203	0.873607	4.68406	2.81e-06	4.82e-05
Tm4sf1	703.634	4.08072	0.380041	10.7376	6.78e-27	1.38e-24
Btn1a1	9.3075	4.07051	0.992058	4.1031	4.08e-05	0.000533537
Tmcc3	123.526	4.07007	0.493029	8.25524	1.52e-16	1.09e-14
Gm39853	9.5526	4.06688	0.993387	4.09395	4.24e-05	0.000551008
Pappa	84.2159	4.06546	0.596878	6.81122	9.68e-12	3.99e-10
Artn	19.7709	4.06539	0.835096	4.86817	1.13e-06	2.15e-05
Rdh10	112.171	4.06536	0.470346	8.64333	5.46e-18	4.84e-16
Large2	10.2761	4.06389	0.996733	4.07721	4.56e-05	0.000585798
Sema7a	9.28475	4.06252	0.992612	4.09275	4.26e-05	0.000553352
Rem2	22.1572	4.05428	0.793361	5.11026	3.22e-07	6.8e-06
Rassf6	9.59952	4.05131	0.994965	4.07181	4.66e-05	0.000598474
Krtcap3	122.965	4.04016	0.449877	8.98059	2.69e-19	2.87e-17
Rbp1	308.875	4.03954	0.937037	4.31098	1.63e-05	0.000236606
4930461G14Rik	9.2977	4.03222	0.995046	4.0523	5.07e-05	0.000643709
D030025P21Rik	9.08821	4.03025	0.994265	4.05349	5.05e-05	0.000641573
Gipc2	22.8472	4.02776	0.806543	4.99386	5.92e-07	1.19e-05
Sprr2f	11.3227	4.02314	1.00308	4.01077	6.05e-05	0.000750763
St3gal6	90.2999	4.02173	0.557795	7.21005	5.59e-13	2.65e-11
4930556M19Rik	12.6288	4.02016	0.936328	4.29353	1.76e-05	0.000252131
Spns2	10.1123	4.01922	0.999463	4.02138	5.79e-05	0.000722128
Foxn1	9.27061	4.0076	0.996822	4.02038	5.81e-05	0.000723957
Il34	158.688	4.00713	0.444719	9.01048	2.05e-19	2.29e-17
Fcho1	12.516	3.99293	0.937252	4.26025	2.04e-05	0.000288713
Cd34	196.434	3.99286	0.914418	4.36656	1.26e-05	0.000188551
Ccl8	9.7978	3.97814	1.00112	3.9737	7.08e-05	0.000863535
Dennd2d	34.7215	3.97119	0.717244	5.53673	3.08e-08	7.89e-07
Espn	22.64	3.96989	0.825339	4.81001	1.51e-06	2.8e-05
Esrp2	11.8891	3.96927	0.936709	4.23746	2.26e-05	0.00031735
Gm24474	9.04691	3.96305	0.999408	3.9654	7.33e-05	0.000887432
Pglyrp1	9.02392	3.96277	0.999341	3.96538	7.33e-05	0.000887432
Lsr	662.64	3.96006	1.00465	3.94175	8.09e-05	0.000968107
Hcn1	9.02709	3.95811	0.999603	3.95968	7.5e-05	0.000904264
Armcx1	9.51522	3.9457	1.00257	3.93558	8.3e-05	0.000985062
Arid3b	14.3658	3.94376	0.877941	4.49206	7.05e-06	0.000112688
Cldn1	18.0042	3.9404	0.848526	4.64381	3.42e-06	5.78e-05
Gng2	42.4088	3.93553	0.660441	5.95894	2.54e-09	7.77e-08
Il1rl2	14.5693	3.92545	0.88792	4.42095	9.83e-06	0.00015074
Slc52a3	24.794	3.92256	0.791066	4.95858	7.1e-07	1.41e-05
Camsap3	35.7821	3.91686	0.692947	5.65247	1.58e-08	4.22e-07
Syne4	17.218	3.91214	0.840249	4.65594	3.23e-06	5.48e-05
Fam83b	30.3748	3.90804	0.743274	5.25788	1.46e-07	3.32e-06
Tnnt1	8.59114	3.90201	1.00198	3.89429	9.85e-05	0.00113584
Cyb561	90.8895	3.90067	0.459723	8.48483	2.16e-17	1.85e-15
Egr1	14.4301	3.89356	0.887551	4.38686	1.15e-05	0.000173974
Aipl1	17.2669	3.88994	0.846835	4.5935	4.36e-06	7.22e-05
Gm19589	8.36034	3.87276	1.00312	3.86073	0.000113051	0.00128509
Ablim3	8.87858	3.86922	1.00557	3.84778	0.000119193	0.00133996
Susd4	8.29609	3.86579	1.00343	3.85258	0.000116879	0.00131545
Rab19	8.51552	3.86216	1.00467	3.8442	0.000120944	0.00135537
Bace2	8.26336	3.85875	1.00376	3.84429	0.000120902	0.00135537
Msx3	8.49574	3.85648	1.00491	3.83766	0.000124213	0.00138874
Kctd17	11.2954	3.8531	0.947287	4.06751	4.75e-05	0.000607974
Chst2	180.477	3.84283	0.485506	7.9151	2.47e-15	1.59e-13
Dok2	32.4872	3.83952	0.753217	5.09749	3.44e-07	7.23e-06
Ptprb	9.45867	3.83767	1.00982	3.80036	0.000144485	0.00158556
Aoc1	8.1323	3.83397	1.00505	3.81472	0.000136335	0.00150422
Armcx4	8.07107	3.83244	1.00485	3.81395	0.000136764	0.00150663
Ccl7	42.0604	3.82803	0.760554	5.03322	4.82e-07	9.84e-06
Rtkn2	8.66952	3.82147	1.00811	3.79072	0.000150214	0.00164211
Cxcl1	810.698	3.81868	0.736248	5.18668	2.14e-07	4.73e-06
Tmtc2	8.22196	3.80544	1.0075	3.77712	0.000158655	0.00172382
Fam117a	35.7056	3.79934	0.69037	5.50334	3.73e-08	9.43e-07
Fc0	8.25757	3.79329	1.00843	3.76157	0.000168853	0.00182351
Piezo2	8.25757	3.79329	1.00843	3.76157	0.000168853	0.00182351
Creb3l1	32.0053	3.78242	0.692501	5.46197	4.71e-08	1.17e-06
Plekhg1	37.9468	3.77453	0.728756	5.17942	2.23e-07	4.89e-06
Hsd17b11	95.5796	3.76696	0.47426	7.94281	1.98e-15	1.28e-13
Serinc2	222.46	3.75814	1.02008	3.68418	0.000229444	0.00238575
Mctp1	7.69215	3.74876	1.0092	3.7146	0.000203525	0.00214437
Gm36582	10.4577	3.74527	0.951902	3.93452	8.34e-05	0.000987766
Bmp6	7.89437	3.74358	1.01045	3.70488	0.00021149	0.00221847
Ces1g	83.1018	3.74199	0.515923	7.253	4.08e-13	1.97e-11
Mirt1	10.6133	3.7397	0.954178	3.91929	8.88e-05	0.00104277
Gpr132	82.3027	3.73651	0.984129	3.79676	0.000146598	0.00160751
Csf2ra	7.57964	3.728	1.01013	3.69059	0.000223732	0.00233828
Cdcp1	118.635	3.72341	0.458857	8.11453	4.88e-16	3.43e-14
Pear1	7.6423	3.72188	1.01081	3.68209	0.000231331	0.00240362
Shfl	8.396	3.72059	1.01372	3.67024	0.000242327	0.00249966
Fam25c	8.03102	3.72013	1.01252	3.67414	0.000238653	0.00246712
Sec14l2	10.3054	3.7171	0.95618	3.88745	0.000101303	0.00116454
Gspt2	7.83874	3.71358	1.01221	3.66877	0.000243721	0.0025086
Stk39	154.423	3.70584	0.427113	8.6765	4.08e-18	3.69e-16
Tubb2b	1438.43	3.69484	0.33976	10.8749	1.52e-27	3.39e-25
2610528J11Rik	7.43295	3.69375	1.01185	3.6505	0.000261731	0.00266514
Irf8	7.89571	3.68909	1.01402	3.63807	0.000274689	0.00277726
1700016K19Rik	7.39873	3.68697	1.01217	3.64263	0.000269865	0.00273236
Srgn	8.23768	3.6785	1.01597	3.62066	0.000293849	0.00295007
Vsig10l	58.8429	3.66505	0.631901	5.80004	6.63e-09	1.88e-07
Sprr2a1	9.88789	3.6599	0.957528	3.82224	0.000132246	0.00146477
Serping1	7.88285	3.65337	1.01629	3.59483	0.000324609	0.00320698
Atp6v1c2	7.71657	3.64868	1.01589	3.5916	0.000328656	0.00324023
Marchf9	24.0882	3.64612	0.802976	4.54075	5.61e-06	9.12e-05
Itgb6	12.2033	3.64323	0.910845	3.99983	6.34e-05	0.000780904
St6gal0c2	17.1121	3.63412	0.828661	4.38554	1.16e-05	0.000174664
Vill	7.73345	3.62168	1.01763	3.55894	0.000372349	0.00360131
Cxxc4	14.896	3.62146	0.870804	4.15876	3.2e-05	0.000431466
Cldn7	9.13051	3.6179	1.02197	3.54012	0.000399941	0.00383954
Cdkn2a	12.1807	3.61592	0.91132	3.96778	7.25e-05	0.000881529
Ramp1	12.3159	3.59296	0.91818	3.91313	9.11e-05	0.00106361
Trim29	351.27	3.59051	0.359088	9.99897	1.54e-23	2.44e-21
Vegfc	9.09536	3.58849	1.02346	3.50624	0.000454485	0.00429098
1700056E22Rik	9.55204	3.58208	0.964243	3.71491	0.000203274	0.00214332
Zc3h12a	60.3705	3.57793	0.561161	6.37594	1.82e-10	6.5e-09
Plscr2	41.5676	3.55924	0.679271	5.2398	1.61e-07	3.64e-06
Adtrp	9.51159	3.55113	0.970459	3.65923	0.000252978	0.00258708
Dmkn	195.407	3.54746	0.855555	4.14639	3.38e-05	0.000451378
Sprr1b	158.499	3.54151	0.490751	7.2165	5.33e-13	2.55e-11
Sprr2h	6.9072	3.53976	1.01962	3.47163	0.000517311	0.00478997
Tjp3	9.0746	3.53568	0.965265	3.66291	0.000249362	0.00255284
G014	7.13538	3.53249	1.02084	3.46038	0.000539419	0.00496794
Ttc9	181.507	3.53004	0.406838	8.67676	4.07e-18	3.69e-16
Klhl30	7.25913	3.52769	1.02157	3.45322	0.000553943	0.00506574
Cldn23	7.23474	3.52558	1.02165	3.45087	0.000558783	0.00510035
Hnf1b	7.31457	3.52184	1.02211	3.44565	0.000569689	0.00516339
D0se1l3	7.18523	3.51676	1.02196	3.4412	0.00057914	0.00522581
Srd5a1	163.558	3.5159	0.394286	8.91713	4.79e-19	4.84e-17
Lncenc1	31.6619	3.50377	0.768333	4.56022	5.11e-06	8.36e-05
Ankk1	44.0203	3.50168	0.659317	5.31107	1.09e-07	2.56e-06
Upk3bl	313.099	3.501	0.949904	3.68564	0.00022813	0.00237584
Psg17	6.65379	3.50033	1.02099	3.42838	0.000607201	0.00544117
Cst6	49.1569	3.49675	0.603933	5.78997	7.04e-09	1.98e-07
Enpp6	6.79058	3.4928	1.02191	3.4179	0.000631072	0.00561276
Vegfa	141.103	3.49122	0.409882	8.51763	1.63e-17	1.41e-15
Dhcr24	424.812	3.4886	0.357176	9.76717	1.56e-22	2.29e-20
Ubald2	135.808	3.48857	0.483667	7.21274	5.48e-13	2.61e-11
Il18rap	18.6452	3.47637	0.841226	4.1325	3.59e-05	0.00047576
Gpx3	8.63861	3.4663	0.971423	3.56827	0.000359347	0.00349451
Fgf1	6.4671	3.45034	1.02321	3.37208	0.000746022	0.0064619
Acot1	54.4474	3.43312	0.652394	5.26234	1.42e-07	3.25e-06
Gm40251	8.36081	3.43073	0.97286	3.52643	0.000421197	0.00401389
Chmp4c	20.6237	3.43002	0.816549	4.20063	2.66e-05	0.000366531
Ppm1h	24.9962	3.42776	0.711637	4.81672	1.46e-06	2.72e-05
Serpinb11	6.53965	3.42398	1.02498	3.34053	0.00083618	0.00715594
Grhl3	6.40023	3.42104	1.02459	3.33895	0.000840962	0.00718638
Lrfn1	8.45499	3.41943	0.973287	3.51328	0.000442613	0.00418999
Calcrl	6.32041	3.41866	1.02445	3.33708	0.000846644	0.00722382
Urah	331.939	3.41583	0.365105	9.35575	8.3e-21	1.04e-18
Tgm1	10.8798	3.40256	0.937298	3.63017	0.00028323	0.0028535
Nlrc5	17.6052	3.39192	0.847484	4.00234	6.27e-05	0.000774011
Fxyd5	92.9012	3.39188	0.586859	5.77972	7.48e-09	2.1e-07
Cd93	6.50859	3.38407	1.02694	3.2953	0.000983173	0.00823602
Stxbp6	40.0813	3.38132	0.652637	5.181	2.21e-07	4.87e-06
Gm7367	15.6331	3.37946	0.881585	3.83339	0.00012639	0.00140742
Thbd	136.318	3.37925	0.408684	8.26862	1.36e-16	9.81e-15
Reps2	6.64791	3.37391	1.02795	3.28216	0.00103013	0.00853917
Defb3	97.5425	3.37161	0.456161	7.39128	1.45e-13	7.46e-12
Spon2	164.503	3.36927	0.442001	7.62278	2.48e-14	1.42e-12
Milr1	21.7115	3.36435	0.796119	4.22594	2.38e-05	0.000332144
Tnfrsf18	19.7938	3.3642	0.834713	4.03036	5.57e-05	0.000698135
Etnk2	6.31621	3.3484	1.02816	3.25668	0.00112724	0.00921029
Gm32575	8.10018	3.34656	0.98082	3.412	0.000644875	0.00572838
Speer3	6.31902	3.34616	1.02837	3.25385	0.00113853	0.00929723
F5	8.19496	3.34548	0.979716	3.41474	0.000638419	0.00567457
Sult4a1	6.15083	3.34189	1.02799	3.25089	0.00115046	0.00937851
Macc1	81.4267	3.34015	0.501888	6.65516	2.83e-11	1.11e-09
Enpp3	6.11106	3.33988	1.02797	3.24901	0.00115807	0.00940835
Vtcn1	22.213	3.33984	0.829815	4.02481	5.7e-05	0.000712321
Prkg2	1031.92	3.32185	0.95132	3.49183	0.000479725	0.00449656
Crybg2	6.03688	3.32146	1.02869	3.22884	0.00124292	0.010014
Tmprss11d	11.6832	3.31978	0.958604	3.46314	0.000533915	0.00492361
Nuak2	64.9424	3.31225	0.502404	6.59281	4.32e-11	1.65e-09
Mroh4	5.98704	3.31103	1.02902	3.21766	0.0012924	0.0103348
Lmntd2	6.39162	3.31014	1.03039	3.21251	0.0013158	0.0104867
Ntrk2	8.28654	3.30993	0.987507	3.3518	0.000802872	0.00690968
Efemp2	34.8668	3.30875	0.711956	4.6474	3.36e-06	5.7e-05
S1pr4	6.08966	3.30583	1.02959	3.21082	0.00132356	0.0105264
Prkcz	9.41529	3.28985	0.999691	3.29086	0.00099881	0.00833053
Cyp3a13	49.5493	3.28966	0.694378	4.73756	2.16e-06	3.85e-05
Mlph	6.3675	3.28035	1.03162	3.1798	0.00147377	0.0115711
R0se1	6.13391	3.2768	1.03116	3.17776	0.00148417	0.0116257
4833407H14Rik	12.2499	3.27127	0.907703	3.6039	0.000313477	0.0031056
Amz1	5.89164	3.26984	1.03073	3.17236	0.00151204	0.0117937
Rph3al	21.2	3.26793	0.762951	4.28328	1.84e-05	0.000263246
Gm13648	5.96013	3.26743	1.03104	3.16905	0.00152937	0.0118834
Cgnl1	299.356	3.26138	0.327877	9.94696	2.6e-23	4.03e-21
Armcx3	6.61685	3.26023	1.03315	3.15561	0.00160162	0.0123507
Usp43	7.87096	3.25517	0.987484	3.29643	0.000979226	0.0082126
Nes	111.223	3.25497	0.939392	3.46498	0.00053028	0.00489959
Gm4610	179.693	3.25365	0.414856	7.84284	4.4e-15	2.77e-13
Myog	6.13242	3.25121	1.03238	3.14924	0.00163698	0.0126029
Ncmap	9.93279	3.24767	0.945618	3.43444	0.000593774	0.00534097
Dync1i1	5.84045	3.24591	1.03172	3.14613	0.00165449	0.0127034
Rnf208	12.2441	3.24103	0.914782	3.54295	0.000395679	0.00380374
Gm35065	9.27123	3.23846	0.936876	3.45666	0.000546914	0.00501754
Smox	181.411	3.2344	0.367509	8.80088	1.36e-18	1.31e-16
9530053A07Rik	36.6516	3.22232	0.681291	4.72973	2.25e-06	3.97e-05
Oasl2	25.3536	3.2178	0.808153	3.98167	6.84e-05	0.000838702
Sh2d5	74.5621	3.21447	0.560538	5.73463	9.77e-09	2.69e-07
Trp53bp2	18.7376	3.21225	0.794165	4.04481	5.24e-05	0.000661686
Fblim1	56.6154	3.21075	0.643888	4.98649	6.15e-07	1.23e-05
Gprc5a	268.658	3.20693	0.325465	9.85339	6.63e-23	1.01e-20
Kcnn4	292.298	3.20659	0.369368	8.68129	3.91e-18	3.58e-16
Areg	98.8657	3.20269	1.02934	3.11141	0.00186195	0.0140024
Rtl6	5.98284	3.19906	1.0342	3.09327	0.00197965	0.014763
Slc23a4	5.59109	3.19779	1.03319	3.09507	0.00196768	0.0147046
Lin28b	20.2954	3.19779	0.762019	4.19646	2.71e-05	0.000371542
Msrb2	5.84193	3.19187	1.03412	3.08654	0.00202498	0.0150304
Tbx20	5.58116	3.19152	1.0334	3.08837	0.00201261	0.0149619
Cyyr1	7.33756	3.19127	0.988378	3.22879	0.00124314	0.010014
Il17re	165.014	3.19024	0.511762	6.23383	4.55e-10	1.56e-08
Gnmt	5.60238	3.17869	1.03407	3.07396	0.00211241	0.0155419
Hao1	5.75059	3.17533	1.0346	3.06913	0.00214683	0.0157545
1700016C15Rik	17.9929	3.16988	0.849842	3.72996	0.000191509	0.00203948
Tcim	84.8961	3.16966	0.605889	5.23142	1.68e-07	3.79e-06
Fes	27.4359	3.16908	0.716137	4.42524	9.63e-06	0.000148703
0t8l	210.456	3.16647	0.969001	3.26777	0.00108399	0.00890792
P2ry12	5.62102	3.16061	1.03486	3.05415	0.002257	0.0164277
Plpp2	351.32	3.15903	0.425814	7.4188	1.18e-13	6.15e-12
Tnfsf9	7.35034	3.15849	1.03848	3.04145	0.0023544	0.0170151
Slco1a5	5.67236	3.15769	1.03511	3.05057	0.00228404	0.0165738
Gm41348	14.6842	3.15273	0.848084	3.71747	0.000201225	0.00212569
n-R5s151	6.03134	3.1491	1.03641	3.03848	0.00237771	0.0171489
Gdpd5	124.356	3.14713	0.412642	7.62679	2.41e-14	1.38e-12
Krt13	838.397	3.14592	0.971417	3.23849	0	0
Atp8b1	5.41587	3.14139	1.03514	3.03476	0.00240725	0.0173444
Tnfaip3	49.5596	3.14054	0.742884	4.22749	2.36e-05	0.000330187
Bcl2l15	6.00854	3.13484	1.0369	3.02327	0.00250063	0.0178817
Acer2	5.78198	3.13364	1.03644	3.02346	0.00249899	0.0178816
Gzmd	5.47275	3.13265	1.03565	3.02481	0.00248787	0.0178262
Dkkl1	5.32612	3.13253	1.03523	3.02591	0.00247883	0.0177792
Slain1	5.50558	3.13168	1.03581	3.02342	0.00249937	0.0178816
Pik3c2b	13.2748	3.12201	0.8949	3.48866	0.000485443	0.0045412
Nebl	63.3606	3.12198	0.629612	4.95857	7.1e-07	1.41e-05
Lce1g	5.66947	3.11538	1.03687	3.0046	0.00265932	0.0188149
Pafah1b3	378.315	3.11278	0.363958	8.55259	1.2e-17	1.05e-15
Map3k8	6.20087	3.11226	1.03812	2.99798	0.00271778	0.0191044
Tmem125	5.3816	3.1112	1.0363	3.00224	0.00268005	0.0189181
Abcb1a	5.28625	3.11079	1.03603	3.0026	0.00267688	0.0189051
Mxra8	9.98861	3.10405	0.970375	3.19882	0.00137993	0.0109246
Efcab15	5.26909	3.10211	1.03634	2.99332	0.00275957	0.0193455
Echdc3	9.21612	3.09918	0.96257	3.21969	0.0012833	0.0102839
Aff2	5.51429	3.09901	1.03706	2.98827	0.00280559	0.0196007
Plk3	11.5063	3.09748	0.933562	3.31792	0.000906918	0.00768296
Gm16104	5.28047	3.09728	1.03656	2.98802	0.00280787	0.019607
Spint2	123.448	3.09205	0.986956	3.13291	0.00173082	0.0131971
Gsto1	8275.66	3.09068	0.285347	10.8313	2.45e-27	5.21e-25
Fam177a2	13.3317	3.08945	0.961274	3.21391	0.00130941	0.0104416
Duoxa1	55.8337	3.08723	0.644844	4.78756	1.69e-06	3.09e-05
Krt12	5.24629	3.08597	1.03693	2.97607	0.00291964	0.0202684
Rac3	5.24061	3.0847	1.03696	2.97474	0.00293237	0.020337
Gm16062	6.93517	3.08357	0.996482	3.09446	0.00197172	0.0147193
Nup62cl	107.648	3.07652	0.922126	3.33633	0.00084892	0.00723891
Cyp2f2	5.90139	3.0729	1.03891	2.95782	0.0030982	0.0212898
Entpd6	15.7261	3.06818	0.836255	3.66896	0.000243541	0.00250856
Ptprj	5.33903	3.06219	1.03802	2.95003	0.00317746	0.0217617
Flacc1	8.36169	3.05945	0.953103	3.20999	0.00132738	0.0105495
Cd164l2	5.59659	3.05875	1.03877	2.94457	0.00323401	0.0220854
Mapkapk3	167.981	3.05718	0.511257	5.97973	2.24e-09	6.92e-08
Asprv1	24.41	3.05606	0.813114	3.75847	0.000170956	0.00184343
Ly6d	138.223	3.05091	1.03863	2.93743	0.00330942	0.0225035
Eps8	230.184	3.05041	0.405849	7.51613	5.64e-14	3.06e-12
Fkbp1b	5.09961	3.04947	1.03794	2.938	0.00330337	0.0224837
Limd2	304.601	3.0491	0.369663	8.24832	1.61e-16	1.15e-14
Ppp2r2c	167.278	3.04811	0.53482	5.69932	1.2e-08	3.28e-07
Adgre5	68.6232	3.04415	0.608397	5.00356	5.63e-07	1.14e-05
Gxylt2	153.092	3.03836	0.515316	5.89611	3.72e-09	1.1e-07
Shisa6	5.01559	3.03161	1.03837	2.91959	0.0035049	0.0235087
H3c3	14.5457	3.02852	0.893961	3.38776	0.000704664	0.00616354
2010204K13Rik	38.3296	3.0284	0.715215	4.23425	2.29e-05	0.000321044
Jaml	5.18937	3.02823	1.03895	2.91471	0.00356022	0.0238004
4930511M06Rik	5.00421	3.02621	1.03854	2.91391	0.00356932	0.0238278
Gm34583	5.04976	3.02584	1.03866	2.91322	0.00357727	0.0238474
Henmt1	5.18363	3.02581	1.03902	2.91217	0.00358924	0.0239159
Sh2d1b1	4.9871	3.02216	1.03865	2.90971	0.00361769	0.0240943
Nfkbid	5.12959	3.01688	1.03916	2.9032	0.00369375	0.0244751
Sema5a	196.499	3.01624	0.338326	8.91518	4.87e-19	4.89e-17
Glrp1	27.5617	3.0138	0.811396	3.71434	0.000203732	0.00214498
Maff	73.7423	3.01278	0.469521	6.41671	1.39e-10	5.03e-09
Hpse	5.3872	3.01003	1.03999	2.89428	0.00380032	0.0250186
Slc25a21	6.54478	3.0077	1.00038	3.00656	0.00264222	0.0187253
Specc1	165.954	3.00724	0.342099	8.79056	1.49e-18	1.41e-16
Mgat4a	18.6827	3.00463	0.80937	3.71231	0.000205379	0.00215815
Apol9b	80.3116	3.00457	0.528034	5.6901	1.27e-08	3.44e-07
Cd24a	1384.29	3.00237	0.245177	12.2457	1.77e-34	6.48e-32
Rnf183	12.4784	3.0015	0.909627	3.2997	0.000967878	0.00814136
Tshz2	5.50119	2.99948	1.04054	2.88263	0.00394365	0.02574
Gm6650	5.16657	2.99897	1.03991	2.88389	0.00392799	0.0256813
Marveld3	23.0381	2.99441	0.747639	4.00516	6.2e-05	0.000766153
Nectin4	49.5815	2.98668	0.624407	4.78322	1.73e-06	3.15e-05
Rasgrp3	13.7779	2.97924	0.878978	3.38944	0.00070035	0.00612957
Srgap1	19.4918	2.97914	0.781095	3.81405	0.000136707	0.00150663
Arc	47.4906	2.97422	0.645224	4.60959	4.03e-06	6.73e-05
Gm32688	4.94872	2.97076	1.04031	2.85565	0.00429484	0.0273772
Elovl4	80.7992	2.96447	0.517597	5.72737	1.02e-08	2.8e-07
Zfp296	11.6039	2.9644	0.900098	3.29343	0.000989745	0.0082668
Crabp1	139.975	2.96319	0.906277	3.26963	0.00107688	0.00886994
Zfp575	4.84042	2.9608	1.04041	2.84581	0.0044299	0.0280875
Chn2	22.6667	2.96078	0.754299	3.9252	8.67e-05	0.00102084
Nectin2	234.915	2.95898	0.336981	8.78087	1.62e-18	1.51e-16
Gm5200	5.01712	2.95623	1.04091	2.84005	0.00451059	0.0284978
Camk2n1	128.395	2.94494	0.428762	6.86846	6.49e-12	2.73e-10
Defb14	26.5907	2.94379	1.04688	2.81197	0.00492397	0.0306347
Enpp4	20.7428	2.94159	0.840027	3.50178	0.000462166	0.00435486
Birc3	6.50496	2.93868	1.00744	2.91697	0.00353452	0.0236735
Tfap2c	8.00818	2.93814	0.970428	3.02767	0.00246448	0.0177031
Cnnm4	61.6977	2.92983	0.510796	5.73581	9.7e-09	2.67e-07
Phyhip	4.76208	2.92761	1.04127	2.81157	0.00493005	0.0306592
Hrh1	4.78913	2.92439	1.04145	2.80799	0.0049852	0.030928
Cd14	30.8566	2.92176	0.664467	4.39716	1.1e-05	0.000166809
Podxl	166.45	2.92068	0.949797	3.07506	0.00210463	0.0155086
Foxg1	24.6777	2.91779	0.76957	3.79146	0.000149765	0.00163845
Foxj1	11.9781	2.91421	0.926116	3.1467	0.00165122	0.0126851
Gm51785	4.83048	2.90889	1.04196	2.79176	0.00524227	0.0320157
Pls1	6.19696	2.90817	1.00887	2.88259	0.00394418	0.02574
LOC115489488	4.64235	2.89981	1.04188	2.78326	0.00538163	0.0326283
Bex2	4.64235	2.89981	1.04188	2.78326	0.00538163	0.0326283
Map1b	179.791	2.89795	0.4705	6.15929	7.31e-10	2.47e-08
Ovol1	14.6853	2.8859	0.925562	3.118	0.00182086	0.0137285
AI463229	4.75061	2.88427	1.04251	2.76665	0.00566353	0.0339621
Gm41029	5.22512	2.8823	1.04333	2.76259	0.00573454	0.0343159
1810019D21Rik	5.97772	2.88166	1.00886	2.85634	0.00428549	0.0273544
Rai14	512.402	2.87835	0.272036	10.5808	3.66e-26	7.05e-24
Ly6e	3770.94	2.87714	0.304915	9.43588	3.88e-21	5.07e-19
Pdgfb	26.2709	2.87511	0.870273	3.30369	0.000954222	0.00804755
Gm34513	5.01717	2.87439	1.04321	2.75534	0.00586306	0.0349092
Syt7	9.88401	2.87241	0.949227	3.02605	0.0024777	0.0177792
Mgarp	5.05956	2.8647	1.04354	2.74518	0.00604782	0.0358001
Nrep	32.7045	2.86349	0.72654	3.94127	8.11e-05	0.000968395
Pcsk9	282.251	2.86265	0.372981	7.67506	1.65e-14	9.79e-13
Nhlrc1	4.72632	2.86224	1.04308	2.74402	0.00606919	0.0358819
Orm1	13.6248	2.86112	0.853737	3.35129	0.000804367	0.00691687
Sox12	30.9066	2.86065	0.664925	4.3022	1.69e-05	0.000244425
Phc2	11.9384	2.8604	0.938323	3.04842	0.00230051	0.0166594
Celf4	185.858	2.85814	0.389756	7.33315	2.25e-13	1.13e-11
Cmbl	4.51842	2.85281	1.04294	2.73535	0.00623133	0.0366347
Gm8773	4.71504	2.84904	1.0434	2.73055	0.00632295	0.037007
Lbp	4.5469	2.84818	1.04311	2.73047	0.00632433	0.037007
AI504432	4.49562	2.84463	1.04311	2.72705	0.00639034	0.0372621
Ccdc166	11.1694	2.84423	0.920032	3.09145	0.00199182	0.0148383
Chit1	6.69394	2.84201	1.02002	2.78624	0.00533237	0.0324261
LOC100861749	9.16281	2.84163	0.942014	3.01654	0.00255674	0.0182173
B4galnt1	5.82525	2.83911	1.01138	2.80715	0.00499815	0.0309701
Plekha7	80.8898	2.83874	0.547275	5.18704	2.14e-07	4.73e-06
Ptprn	49.3263	2.83778	0.647859	4.38024	1.19e-05	0.000178398
Sprr1a	331.296	2.83704	1.01841	2.78576	0.00534031	0.0324467
Traf1	6.00201	2.83565	1.01222	2.80143	0.00508773	0.0313798
Jam2	53.8881	2.82894	0.680227	4.15881	3.2e-05	0.000431466
Trpa1	6.05534	2.82777	1.0453	2.70522	0.00682595	0.039345
Gpr39	10.8184	2.82728	0.925241	3.05572	0.00224523	0.0163587
Cpz	4.70497	2.82711	1.04389	2.70825	0.00676386	0.0390345
C3	105.842	2.82358	0.937021	3.01336	0.00258376	0.0183748
Pcyt1b	34.2779	2.81762	0.621304	4.53501	5.76e-06	9.36e-05
Lpin3	14.4657	2.81441	0.885576	3.17806	0.00148263	0.0116227
Arrdc4	135.328	2.80906	0.478453	5.87112	4.33e-09	1.27e-07
Cd37	42.7921	2.80903	0.635211	4.4222	9.77e-06	0.000150033
Mmp10	4.38316	2.80274	1.04395	2.68476	0.00725819	0.0411711
Opn3	21.9344	2.80239	0.853361	3.28394	0.00102365	0.00850022
5430437J10Rik	4.49571	2.80052	1.04418	2.68202	0.00731785	0.0413958
Rab27b	73.5953	2.79769	0.582164	4.80567	1.54e-06	2.86e-05
Hid1	4.37747	2.79342	1.04415	2.67529	0.0074664	0.0420512
Cadm1	392.72	2.79299	0.383762	7.27791	3.39e-13	1.66e-11
Disp2	6.06061	2.79181	1.01688	2.74546	0.00604257	0.0357839
Lgr6	382.36	2.78855	0.39897	6.98936	2.76e-12	1.2e-10
Prkch	71.9109	2.78802	0.526291	5.29748	1.17e-07	2.75e-06
Bcl3	64.378	2.77778	0.646634	4.29575	1.74e-05	0.000250634
Atg9b	27.9085	2.77724	0.785469	3.53578	0.000406578	0.00389278
Ctsf	7.39317	2.77521	0.981429	2.82772	0.00468802	0.0294104
Crip1	323.138	2.77426	0.400627	6.92481	4.37e-12	1.87e-10
Dusp6	4.5284	2.77215	1.04485	2.65317	0.00797399	0.0444363
Clmp	15.6151	2.77083	0.886336	3.12616	0.00177106	0.0134179
Mfsd4a	21.748	2.76552	0.838486	3.29824	0.000972944	0.00817433
Eno1	4.66376	2.76284	1.04519	2.64339	0.00820809	0.0454648
Igsf9	210.817	2.75765	0.90104	3.06052	0.00220953	0.0161481
Kctd14	32.8911	2.75735	0.737765	3.73743	0.000185907	0.00198961
Apln	41.7422	2.7503	0.564959	4.86814	1.13e-06	2.15e-05
Cfap54	4.42297	2.74859	1.04514	2.62986	0.00854198	0.0468512
Slc37a1	5.83243	2.74587	1.0189	2.69494	0.00704023	0.0402387
Ano1	248.76	2.74196	0.362548	7.56303	3.94e-14	2.18e-12
Gsto2	6.84016	2.74166	0.978202	2.80276	0.00506679	0.0312918
Abcb9	46.2778	2.74068	0.724859	3.78098	0.000156213	0.00170247
Gm31555	4.31056	2.73587	1.04523	2.61747	0.0088584	0.0484191
Tnfaip2	329.742	2.73367	0.280341	9.75123	1.82e-22	2.65e-20
Ang2	4.8048	2.73266	1.04584	2.61289	0.008978	0.0488856
Stfa3	5.58881	2.731	1.01903	2.68001	0.00736207	0.041595
Irgm1	9.42921	2.72923	0.906116	3.01201	0.00259521	0.0184471
Clec2f	152.398	2.72696	0.352973	7.72568	1.11e-14	6.78e-13
Gm41767	4.28058	2.72616	1.04539	2.60778	0.00911305	0.0494699
Bhlhe40	178.107	2.72611	0.790462	3.44876	0.000563176	0.00512717
Gm266	4.26347	2.7214	1.04546	2.60307	0.00923941	0.0499802
Krt17	7876.07	2.71961	0.287478	9.46023	3.07e-21	4.06e-19
Dusp2	7.38451	2.71859	0.990549	2.74452	0.00605989	0.0358418
Clcn5	245.408	2.71809	0.314002	8.65627	4.87e-18	4.37e-16
Tmem191c	4.1566	2.71781	1.04539	2.59982	0.0093273	0.0503324
Epsti1	4.15091	2.71488	1.04543	2.5969	0.0094069	0.0507176
Litaf	537.036	2.714	0.324378	8.36677	5.92e-17	4.64e-15
Zbp1	4.17367	2.71076	1.04553	2.59271	0.0095223	0.0511851
Plekhh1	4.21367	2.70601	1.04565	2.58786	0.00965734	0.0517355
Lingo2	4.28197	2.70192	1.04579	2.58361	0.00977723	0.0521816
Tc2n	4.14518	2.70118	1.04566	2.58322	0.00978817	0.0521816
Prr15	4.41155	2.70029	1.04595	2.58167	0.00983245	0.0523394
Elapor2	4.1338	2.70019	1.04567	2.58227	0.00981529	0.0522676
Ifitm1	5.45159	2.68667	1.01973	2.63467	0.00842187	0.0463859
Pspn	4.16224	2.68373	1.04596	2.5658	0.0102937	0.0542081
Mark1	12.246	2.68259	0.868903	3.08733	0.00201964	0.0150063
Gm17546	4.11674	2.68081	1.04596	2.56301	0.0103768	0.0545853
Nfe2l3	39.6999	2.67922	0.683955	3.91725	8.96e-05	0.00104991
Erfe	5.39801	2.67664	1.02039	2.62316	0.00871187	0.0476547
Dock11	58.9897	2.6761	0.502293	5.32777	9.94e-08	2.35e-06
Gpr50	4.19073	2.67266	1.04615	2.55477	0.0106258	0.0555546
Gpx2-ps1	48.9018	2.66932	1.04	2.56666	0.0102682	0.0541139
Eps8l1	29.9226	2.66888	0.71155	3.75079	0.000176277	0.00189507
Prl7a1	4.15245	2.66306	1.04623	2.54538	0.010916	0.0566488
Arhgef16	39.6076	2.66114	0.704137	3.77929	0.000157274	0.00171142
Syngr1	125.269	2.66067	0.945645	2.81361	0.00489893	0.0305391
Rbpms2	163.232	2.6555	0.358576	7.4057	1.3e-13	6.77e-12
S100a7a	4.42455	2.65491	1.04655	2.53682	0.0111863	0.0576531
Gm35829	4.24789	2.65479	1.04643	2.53701	0.0111804	0.0576437
Gm671	4.02134	2.64905	1.04631	2.5318	0.0113478	0.0582119
Samd12	202.712	2.649	0.330464	8.01599	1.09e-15	7.28e-14
Ttc22	4.02125	2.64597	1.04635	2.52875	0.0114468	0.0585726
Bmp8b	4.12396	2.64181	1.04648	2.52446	0.0115875	0.0591332
Ces2b	4.10676	2.63987	1.04649	2.52259	0.0116496	0.0593758
Nccrp1	5.74323	2.63632	1.0472	2.51749	0.0118196	0.0600491
Mgat4c	4.39463	2.63499	1.04675	2.51731	0.0118256	0.0600584
She	4.02693	2.63484	1.0465	2.51778	0.0118098	0.060042
Lgals7	21.0445	2.63388	0.873848	3.01411	0.00257732	0.0183382
Clic3	47.7435	2.63264	1.03064	2.55438	0.0106377	0.055589
Pard6b	25.4318	2.63234	0.747303	3.52245	0.000427573	0.00406061
Slc44a1	151.058	2.63231	0.507457	5.18726	2.13e-07	4.73e-06
Micall2	57.2067	2.62908	0.988765	2.65895	0.00783835	0.0438346
Exoc3l4	47.3628	2.62602	0.586131	4.48027	7.45e-06	0.000118563
Zfp607a	6.70178	2.62454	0.996197	2.63456	0.00842463	0.0463859
Fos	11.1466	2.61078	0.931912	2.80153	0.00508602	0.0313798
Mroh6	8.27128	2.61069	0.968316	2.69611	0.00701544	0.0401386
Epb41	5.0404	2.60949	1.02371	2.54905	0.0108018	0.0562211
Stx3	329.472	2.60802	0.289933	8.99525	2.36e-19	2.59e-17
Lamb3	510.65	2.60732	0.280219	9.30458	1.35e-20	1.65e-18
Spred2	54.4487	2.60551	0.618475	4.2128	2.52e-05	0.00034934
Gfpt2	3.90305	2.60164	1.04676	2.48542	0.01294	0.0642316
Cd1d1	14.9072	2.6015	0.856773	3.03639	0.00239427	0.0172595
Foxe1	5.27972	2.59827	1.02581	2.5329	0.0113124	0.0580514
Ltbp2	56.8906	2.59752	0.676998	3.83682	0.000124636	0.00139128
Atp9a	144.65	2.5933	0.445036	5.82718	5.64e-09	1.63e-07
Arid5a	52.2372	2.58982	0.601138	4.30819	1.65e-05	0.000239119
Sema4a	13.9282	2.58902	0.904439	2.86257	0.00420218	0.0270568
Ptger4	92.8506	2.5855	0.514969	5.0207	5.15e-07	1.05e-05
Rnf130	28.2187	2.57857	0.778288	3.31313	0.000922573	0.00780168
Bnip3	427.175	2.57637	0.690269	3.73241	0.000189657	0.00202215
Sncg	926.634	2.57532	0.233632	11.023	2.96e-28	7.28e-26
Tmprss13	5.17924	2.57498	1.04732	2.45863	0.013947	0.0681294
Gm29630	9.29423	2.5744	0.949535	2.71122	0.00670354	0.0387491
Scel	7.14179	2.57212	1.01013	2.54633	0.0108861	0.0565349
Gm19680	58.9993	2.56834	0.519413	4.9447	7.63e-07	1.49e-05
Phyhd1	82.8486	2.56527	0.438386	5.85161	4.87e-09	1.42e-07
Fut1	3.9756	2.56208	1.04713	2.44677	0.0144143	0.0699673
Gm52877	6.45441	2.56049	0.996852	2.56858	0.0102117	0.0538759
Ophn1	6.3524	2.56026	0.994862	2.57348	0.010068	0.0533149
Ccdc149	4.98076	2.55723	1.026	2.49244	0.012687	0.0633726
Gm42113	18.105	2.555	0.816926	3.12758	0.00176254	0.0133853
S100a16	509.444	2.55448	0.362546	7.04597	1.84e-12	8.26e-11
Mical1	9.25928	2.55431	0.946372	2.69905	0.0069537	0.0399201
Ly6a	7520.5	2.55383	0.271318	9.41271	4.83e-21	6.27e-19
C130074G19Rik	4.25502	2.54811	1.04727	2.4331	0.0149703	0.0720534
Chml	11.7914	2.54539	0.909709	2.79803	0.00514155	0.0316025
Ckmt1	33.3359	2.54183	0.659788	3.85249	0.000116921	0.00131545
Nlrp10	3.90734	2.54169	1.04722	2.4271	0.0152203	0.0730098
Tbc1d9	3.74494	2.53976	1.04716	2.42537	0.0152927	0.073259
Fst	256.006	2.53805	0.862473	2.94276	0	0
Mboat2	69.2221	2.5365	0.496653	5.1072	3.27e-07	6.9e-06
Vsnl1	243.799	2.53588	0.34819	7.28302	3.26e-13	1.6e-11
Pde1a	3.69934	2.53076	1.0472	2.4167	0.0156618	0.074676
Gjb4	83.6652	2.53035	0.444928	5.6871	1.29e-08	3.49e-07
Arhgap26	4.87394	2.52806	1.02716	2.46123	0.0138463	0.0677871
Mt3	3.91877	2.52688	1.04728	2.41281	0.0158302	0.0753281
Stau2	33.4912	2.52042	0.728099	3.46165	0.000536877	0.00494773
Cyp4f39	5.4099	2.52027	1.04729	2.40647	0.0161074	0.0763414
Ptpn3	18.5104	2.5198	0.83786	3.00742	0.00263477	0.0186818
Usp18	22.452	2.5174	0.852577	2.95269	0.00315015	0.021585
Arhgef3	61.4048	2.51397	0.651742	3.8573	0.000114645	0.00129701
Akt3	69.579	2.5139	0.948816	2.64951	0.00806081	0.0448137
Dyrk3	44.489	2.51337	0.639017	3.93318	8.38e-05	0.00099165
Gm19249	12.6942	2.51212	0.879064	2.85772	0.00426698	0.0272972
Calml3	5.3643	2.51055	1.04726	2.39725	0.0165186	0.0777222
Tmem176b	2085.35	2.5068	0.228142	10.9879	4.37e-28	1.02e-25
Mtcl1	29.8702	2.50589	0.622222	4.02733	5.64e-05	0.000705351
Krt80	57.4301	2.49971	0.500473	4.9947	5.89e-07	1.19e-05
Rbbp8nl	3.65943	2.49756	1.04731	2.38473	0.0170918	0.0798745
Fam189a1	7.09454	2.49435	0.963624	2.58851	0.00963926	0.051658
Col9a3	11.953	2.49427	0.919464	2.71274	0.00667286	0.0386343
Asb16	3.70512	2.49013	1.04733	2.37759	0.0174263	0.0812117
Unc13c	12.4863	2.48963	0.879924	2.82937	0.00466396	0.0292852
Tead2	32.549	2.48935	0.738155	3.37239	0.000745185	0.0064619
Esm1	4.00576	2.48858	1.04735	2.37608	0.0174976	0.0814158
Gm36440	3.85903	2.4871	1.04735	2.37466	0.0175649	0.0816756
Rapgef5	125.438	2.48695	0.39165	6.34992	2.15e-10	7.61e-09
Sh2d4b	3.69929	2.48533	1.04734	2.37299	0.0176446	0.0819394
Fads6	3.63668	2.48489	1.04734	2.37259	0.0176641	0.0819729
Tmem79	51.8145	2.48282	0.996819	2.49074	0.0127477	0.0636316
Ms4a10	3.59257	2.48237	1.04733	2.37019	0.0177792	0.0823766
Aldh1l1	44.8184	2.48234	0.677231	3.66542	0.00024693	0.00253432
Ap5b1	25.6957	2.4823	0.687428	3.611	0.000305021	0.00303659
1500009L16Rik	33.8901	2.48112	0.70983	3.49537	0.000473401	0.00444821
Rtn2	3.55834	2.47503	1.04734	2.36316	0.0181198	0.083629
Crispld2	4.11402	2.47309	1.04732	2.36134	0.018209	0.0839593
Adra1d	3.90463	2.47153	1.04734	2.35982	0.018284	0.0842504
Slc7a8	28.9069	2.47067	0.760276	3.2497	0.00115528	0.00939632
Enpp5	12.024	2.46745	0.870407	2.83482	0.00458514	0.0288793
Rspo3	3.67239	2.46744	1.04735	2.3559	0.018478	0.0848592
Gm5124	3.62525	2.46737	1.04735	2.35583	0.0184815	0.0848592
Ryr1	3.54123	2.46517	1.04735	2.35373	0.0185861	0.0851475
S100z	3.58119	2.46133	1.04735	2.35006	0.0187705	0.0857545
Akr1c13	3.65952	2.46101	1.04734	2.34976	0.0187853	0.0857846
Traf4	153.479	2.45908	0.463704	5.30313	1.14e-07	2.67e-06
Slc27a1	23.9439	2.45802	0.75217	3.2679	0.00108349	0.00890792
Lrrn4cl	3.73781	2.45778	1.04733	2.3467	0.0189403	0.0863542
Col4a4	72.004	2.45585	1.04088	2.35939	0.0183049	0.0843197
Traf3ip1	20.1481	2.45552	0.864228	2.84129	0.00449318	0.0284004
Klk7	3.6439	2.45479	1.04734	2.34383	0.0190868	0.0867449
1700007K13Rik	29.8646	2.45463	0.720238	3.40808	0.000654219	0.00580056
Syt13	4.64818	2.45269	1.04713	2.34229	0.0191657	0.0869928
Ppm1j	3.72778	2.44684	1.04731	2.3363	0.0194754	0.088311
Nudc-ps1	15.0901	2.44655	0.87346	2.80099	0.00509461	0.0313816
Spef1l	7.22385	2.44528	0.982109	2.48983	0.0127806	0.0636841
Fgd6	25.5355	2.44456	0.84103	2.90663	0.00365344	0.0242531
Gm36470	4.87398	2.44432	1.03335	2.36543	0.0180092	0.0831454
Cyba	20.6199	2.44403	0.862055	2.83512	0.00458078	0.0288646
Ada	64.9218	2.44378	0.561237	4.35428	1.34e-05	0.000198392
Tmc8	3.61961	2.44297	1.04732	2.33259	0.0196695	0.08894
Efcc1	4.68809	2.44207	1.03171	2.36702	0.0179321	0.0828388
Cdk18	110.912	2.44201	0.957145	2.55134	0.0107308	0.0560036
Pcsk5	4.59881	2.43903	1.03253	2.36217	0.0181682	0.0837981
Rab3b	3.86743	2.43836	1.04726	2.32833	0.0198944	0.0897011
Eomes	28.4129	2.4378	0.658111	3.70425	0.00021202	0.00222239
Nfkbiz	154.7	2.43765	0.353441	6.89691	5.31e-12	2.25e-10
Arhgef37	3.83614	2.43763	1.04727	2.32762	0.0199325	0.089816
Apba1	3.83614	2.43763	1.04727	2.32762	0.0199325	0.089816
Tmem74	7.36818	2.43703	0.980896	2.4845	0.0129735	0.064331
Tex21	3.50137	2.43658	1.04732	2.32648	0.0199929	0.0900143
Tmem139	3.5811	2.43432	1.04731	2.32436	0.020106	0.090398
Skint4	4.13935	2.43239	1.04716	2.32285	0.0201873	0.0906207
Epas1	38.7536	2.43236	0.688698	3.53182	0.000412703	0.00394084
Rab3ip	93.3498	2.43028	0.410116	5.92584	3.11e-09	9.29e-08
Aldoc	71.3044	2.42786	1.04644	2.32012	0.0203343	0.0911368
Ccn5	18.9429	2.42772	0.802586	3.02487	0.00248737	0.0178262
Gm26559	3.66101	2.42575	1.04726	2.31628	0.0205432	0.0918072
Snhg7os	3.5127	2.4256	1.04729	2.31607	0.0205546	0.0918072
Crct1	25.56	2.42336	0.771594	3.14072	0.00168535	0.0129126
Bmp7	3.48426	2.42319	1.04729	2.31377	0.0206803	0.092224
Car5b	138.77	2.41846	0.465154	5.19927	2e-07	4.45e-06
Rgs20	3.5299	2.4173	1.04726	2.30821	0.0209875	0.0932734
Pate14	3.59261	2.41343	1.04723	2.30459	0.0211895	0.0939079
Gmpr	42.8191	2.41203	0.556788	4.33203	1.48e-05	0.000218184
Cox7a1	3.46863	2.40639	1.04723	2.29785	0.0215703	0.0953585
Kbtbd6	3.56981	2.40494	1.04719	2.29656	0.0216438	0.0956241
Kbtbd11	3.52407	2.40316	1.0472	2.29485	0.0217417	0.0959675
Npc2	3109.13	2.39972	0.265754	9.02987	1.72e-19	1.93e-17
Lypd2	3.43441	2.39765	1.0472	2.28958	0.0220457	0.0970091
Sox11	1638.45	2.39407	0.285858	8.37503	5.52e-17	4.38e-15
S100a3	93.8538	2.3926	0.45579	5.24935	1.53e-07	3.47e-06
Cask	50.098	2.39255	0.538767	4.44079	8.96e-06	0.000139746
Frmpd1	3.3945	2.3882	1.04716	2.28063	0.0225702	0.0985874
Ccl9	41.9385	2.38781	0.717408	3.32839	0.000873507	0.00743523
Klk12	3.98124	2.38396	1.04686	2.27724	0.0227717	0.0992548
Pstpip2	7.78872	2.38246	0.949623	2.50884	0.0121127	0.0611895
Aldh3b2	6.32433	2.38161	1.04581	2.27729	0.0227691	0.0992548
Slc41a2	25.8718	2.3804	0.760754	3.129	0.00175405	0.0133315
Slc23a3	8.22016	2.38037	0.966512	2.46284	0.013784	0.0675979
Mcam	282.364	2.37791	0.481446	4.9391	7.85e-07	1.54e-05
Tmem134	29.0242	2.37697	0.778102	3.05482	0.00225192	0.0163991
Sh3bgrl2	104.853	2.37236	0.533538	4.44648	8.73e-06	0.000137037
Asxl3	3.34895	2.37214	1.04708	2.26548	0.0234832	0.101549
Sft2d1	21.9978	2.37208	0.868519	2.73117	0.00631093	0.036974
Arrb1	11.2779	2.36926	0.950403	2.4929	0.0126706	0.0633129
Sp9	9.15997	2.36796	0.931296	2.54265	0.0110016	0.0569483
Snord14e	3.40028	2.36711	1.04702	2.26081	0.023771	0.102576
Gjb3	143.765	2.36592	0.431782	5.47943	4.27e-08	1.07e-06
Fam43a	29.2514	2.36511	0.719329	3.28794	0.00100923	0.00840008
Crnn	4.77747	2.36316	1.04622	2.25877	0.0238979	0.102937
Tmem141	48.0297	2.3591	0.509065	4.63419	3.58e-06	6.04e-05
Plscr3	5.47229	2.35568	1.04174	2.2613	0.0237405	0.102531
Fxyd3	4.31896	2.35339	1.04633	2.24917	0.0245014	0.104752
Plekhg6	35.0745	2.35328	0.717058	3.28185	0.00103128	0.00854372
Pitpnc1	97.6369	2.35207	0.574823	4.09181	4.28e-05	0.000555091
Cyp2s1	32.2836	2.35069	0.713471	3.29473	0.000985178	0.00824314
C630043F03Rik	9.00575	2.34713	0.93738	2.50393	0.0122824	0.0618524
Fbxo17	22.1342	2.34678	0.764115	3.07124	0.00213171	0.0156677
Pgap1	135.166	2.34657	0.565785	4.14745	3.36e-05	0.000449928
Gm46366	8.94028	2.34273	0.93563	2.5039	0.0122832	0.0618524
Shroom2	68.2432	2.34189	0.518568	4.51607	6.3e-06	0.00010143
Angpt2	10.6988	2.34162	0.862571	2.7147	0.00663367	0.0384387
Gm35853	5.27619	2.34093	1.00624	2.32641	0.0199966	0.0900143
Tspan7	61.0439	2.33788	0.488271	4.78807	1.68e-06	3.09e-05
Alox5	3.26493	2.33645	1.04683	2.23193	0.0256194	0.108453
5033421B08Rik	4.29774	2.33531	1.0461	2.23238	0.0255896	0.108359
5830418P13Rik	6.99065	2.33378	0.990855	2.35532	0.0185066	0.0849357
Ell3	3.29341	2.33288	1.04677	2.22864	0.025838	0.109091
Gm6430	26.5623	2.33285	0.854927	2.72872	0.00635815	0.0371324
Mlf1	3.2535	2.32937	1.04676	2.22531	0.0260604	0.109833
Mmp12	3.2535	2.32937	1.04676	2.22531	0.0260604	0.109833
Ano7	3.2763	2.32835	1.04674	2.22439	0.0261222	0.110059
Gm6781	55.7828	2.32606	0.544792	4.26963	1.96e-05	0.000279051
Arhgap8	3.22502	2.324	1.04672	2.22026	0.0264011	0.110841
4930594M22Rik	3.45582	2.32379	1.04654	2.22045	0.0263881	0.110841
Pilrb2	3.23644	2.32313	1.04671	2.21947	0.0264551	0.111035
Frat2	18.8613	2.32291	0.79496	2.92205	0.00347739	0.0233562
Btbd17	3.37165	2.32115	1.04658	2.21785	0.0265651	0.111268
Oas1c	7.57647	2.32071	0.956035	2.42743	0.0152062	0.0729917
Serpi09	3.25919	2.32057	1.04666	2.21711	0.0266152	0.11138
H3c13	3.31626	2.31686	1.04658	2.21375	0.0268461	0.111919
Kcne3	3.31626	2.31686	1.04658	2.21375	0.0268461	0.111919
Tes	560.667	2.31504	0.276295	8.37888	5.34e-17	4.31e-15
Man1a	66.7542	2.31351	0.512189	4.51691	6.27e-06	0.000101263
Mapt	3.42159	2.31235	1.04642	2.20978	0.0271208	0.112784
Svip	4.38236	2.31089	1.03759	2.22716	0.0259365	0.109465
Dio2	3.23075	2.31021	1.04656	2.20743	0.0272839	0.113281
Tnfrsf9	3.57125	2.30822	1.04626	2.20616	0.0273725	0.113549
Ifitm6	3.21928	2.30528	1.04651	2.20284	0.0276063	0.114353
Cysrt1	7.32471	2.30455	1.00791	2.28647	0.0222268	0.0975055
Hebp2	109.191	2.30247	0.474825	4.84909	1.24e-06	2.35e-05
Bscl2	232.888	2.302	0.392845	5.85981	4.63e-09	1.35e-07
Krt78	3.43861	2.3019	1.04626	2.20013	0.027798	0.114947
Epop	50.3714	2.29478	0.534459	4.29365	1.76e-05	0.000252131
Map4k1	13.2366	2.29391	0.917712	2.49959	0.0124336	0.0625011
Aig1	179.819	2.29305	0.491996	4.66071	3.15e-06	5.37e-05
Dsg3	52.4668	2.29009	0.698454	3.27879	0.00104252	0.00863181
Mapk10	3.31057	2.28978	1.04622	2.18863	0.028624	0.117646
Kcnj4	3.17373	2.28433	1.04626	2.18333	0.0290116	0.11859
H60c	34.8468	2.28121	0.661223	3.44999	0.000560597	0.00510695
Ppp1r10	4.15297	2.27783	1.03869	2.19299	0.028308	0.116515
Gm12033	4.45347	2.27428	1.04092	2.18487	0.0288984	0.118297
Ptger2	3.64222	2.27427	1.04564	2.17501	0.0296295	0.120392
Sod3	23.7761	2.27331	0.785088	2.89561	0.0037842	0.024976
Iqcf4	3.16231	2.26944	1.04604	2.16955	0.0300406	0.121819
Senp3	46.7768	2.26903	0.775251	2.92683	0.00342437	0.0230761
Hmgcll1	52.9444	2.26896	0.639347	3.54886	0.000386896	0.00373694
Pou2f2	4.25559	2.2685	1.0399	2.18145	0.02915	0.118985
Acsl4	509.626	2.26544	0.306429	7.39303	1.44e-13	7.39e-12
Rpia	226.879	2.2651	0.372925	6.07388	1.25e-09	4.06e-08
Cutal	3.15662	2.26457	1.04597	2.16505	0.0303842	0.122753
Sh2d3c	25.8135	2.26381	0.764002	2.96309	0.00304566	0.0209599
Lrr1	11.0101	2.26367	0.907088	2.49554	0.0125767	0.0629539
Dsc2	83.2794	2.25846	0.621767	3.63233	0.000280869	0.00283172
Sprr2b	3.15242	2.25778	1.04588	2.15874	0.0308702	0.12423
Gfra1	24.258	2.25705	0.751223	3.0045	0.00266014	0.0188149
Lmtk3	7.75707	2.25644	0.981398	2.29921	0.0214931	0.0950469
Plag1	3.08971	2.25639	1.04592	2.15733	0.0309799	0.12446
Ifitm5	3.14673	2.25566	1.04585	2.15678	0.0310228	0.124511
Qrfp	34.9487	2.25445	0.592717	3.80359	0.000142617	0.00156747
Coro2a	22.8823	2.25383	0.667667	3.37568	0.000736346	0.00640141
Susd1	3.26917	2.25282	1.04564	2.1545	0.031201	0.125038
AA986860	34.8584	2.25276	0.663809	3.39369	0.000689574	0.0060501
Car13	121.017	2.25135	0.395411	5.69371	1.24e-08	3.37e-07
4930471E19Rik	3.10113	2.24905	1.04578	2.1506	0.0315081	0.125909
Apobec3	113.823	2.24863	0.400761	5.6109	2.01e-08	5.29e-07
Cttnbp2nl	155.104	2.24694	0.349657	6.42613	1.31e-10	4.74e-09
Cxcr4	3.14524	2.24582	1.04566	2.14776	0.0317326	0.126514
M1ap	9.32254	2.24246	0.96817	2.31618	0.0205483	0.0918072
Msx2	22.0682	2.24206	0.887328	2.52675	0.0115123	0.0588024
Gm52290	3.19233	2.24071	1.04553	2.14314	0.0321017	0.127566
Hecw1	3.07833	2.2404	1.04565	2.14259	0.0321461	0.127601
Gm10658	3.0498	2.23829	1.04564	2.14059	0.0323072	0.128133
Rgs11	3.15088	2.23614	1.04547	2.13888	0.032445	0.128537
Ikbke	106.551	2.23469	0.404254	5.52795	3.24e-08	8.28e-07
Ubash3b	50.2996	2.23393	0.689127	3.24168	0.00118827	0.00961691
Abhd2	44.2563	2.23323	0.579067	3.85659	0.000114978	0.00129974
Gpc2	23.5325	2.23223	0.785485	2.84185	0.00448527	0.028363
Aqp2	3.13951	2.23193	1.0454	2.13501	0.0327605	0.129463
Ldhb	177.508	2.23131	0.358845	6.21802	5.03e-10	1.73e-08
Ccdc3	3.19643	2.23084	1.04531	2.13414	0.0328312	0.129635
Map3k9	122.358	2.229	0.963645	2.31309	0.0207175	0.0923613
Gm36182	16.623	2.22579	0.812695	2.73878	0.0061668	0.0363385
Arl11	3.03842	2.22559	1.04541	2.1289	0.0332624	0.131011
Ctsw	10.0197	2.22447	0.944479	2.35524	0.018511	0.0849357
Slc25a43	8.86393	2.22364	0.959954	2.3164	0.0205363	0.0918072
AI661453	101.266	2.22226	0.506415	4.38821	1.14e-05	0.000173082
Nxnl2	3.39311	2.22183	1.04487	2.12642	0.033468	0.131603
Socs1	20.0018	2.22141	0.80025	2.7759	0.00550496	0.0332067
Fam102a	58.8168	2.2211	0.506675	4.38368	1.17e-05	0.000175976
Kcnj8	3.027	2.2207	1.04533	2.1244	0.033637	0.132066
Mocs3	37.5386	2.22039	0.728644	3.0473	0.0023091	0.0167047
Tspan13	49.906	2.21967	0.567967	3.90809	9.3e-05	0.00108249
Gm52028	3.27626	2.21966	1.04499	2.1241	0.0336617	0.13211
Thsd4	104.298	2.21918	1.01486	2.18668	0.028766	0.117992
Adm	133.978	2.21856	0.395892	5.60397	2.09e-08	5.49e-07
Cnksr1	76.0187	2.21807	0.941291	2.35641	0.0184524	0.0848072
2310047K21Rik	175.796	2.2138	0.372477	5.94347	2.79e-09	8.45e-08
Sema3b	10.5817	2.21283	0.911763	2.42698	0.0152253	0.0730098
Spry2	100.722	2.21226	0.405788	5.45176	4.99e-08	1.23e-06
Shf	16.4858	2.20979	0.819413	2.6968	0.00700098	0.0400947
Fdps	234.281	2.20975	0.3577	6.17766	6.51e-10	2.22e-08
Mapk11	23.8268	2.20857	0.79469	2.77916	0.0054499	0.0329163
Krt4	70.8955	2.20486	1.03837	2.1234	0	0
Mbnl3	533.559	2.20247	0.323297	6.81253	9.59e-12	3.97e-10
Gm8731	4.07692	2.20008	1.04116	2.11311	0.0345911	0.134945
Gm19859	3.00989	2.19916	1.0449	2.10467	0.0353204	0.137073
Parpbp	25.2682	2.19899	0.683276	3.21831	0.00128948	0.0103231
Gramd1b	7.66453	2.19887	0.99125	2.21828	0.0265357	0.111242
2510039O18Rik	189.31	2.1983	0.365083	6.02136	1.73e-09	5.46e-08
Plin2	589.366	2.19586	0.291988	7.52038	5.46e-14	2.97e-12
Gstt1	15.4257	2.19515	0.763159	2.8764	0.00402242	0.0261788
Foxa2	4.00041	2.19372	1.0418	2.1057	0.0352308	0.1368
4933433H22Rik	3.02695	2.19224	1.04472	2.0984	0.0358695	0.138625
Porcn	377.514	2.18994	0.462393	4.73611	2.18e-06	3.87e-05
Sptlc2	147.651	2.18803	0.406294	5.38535	7.23e-08	1.74e-06
Crlf1	16.0245	2.18733	0.901905	2.42524	0.0152983	0.0732613
Macrod2	21.1223	2.1857	0.776886	2.81341	0.00490192	0.0305391
Gm19209	10.7541	2.18308	0.928304	2.35168	0.0186886	0.0854946
Klk14	5.37568	2.1813	1.04193	2.09352	0.036303	0.139691
Tnfrsf1b	35.712	2.18102	0.668021	3.2649	0.00109502	0.00898825
2610318N02Rik	2.9772	2.17992	1.04452	2.08701	0.0368876	0.14127
Gch1	20.7148	2.17932	0.841115	2.59099	0.00956996	0.0513832
H2-D1	3.87461	2.17907	1.04061	2.09403	0.0362575	0.139673
Rin3	13.3077	2.17735	0.880237	2.47359	0.0133762	0.0659695
Nod2	19.0199	2.17598	0.794397	2.73916	0.00615959	0.036311
Insig1	48.5271	2.17426	0.532857	4.08038	4.5e-05	0.000579953
Ccdc153	2.91449	2.17171	1.04442	2.07935	0.0375848	0.143174
Cradd	30.8853	2.1702	0.684213	3.17182	0.00151487	0.0118093
Fetub	2.92586	2.16519	1.04424	2.07347	0.0381287	0.144859
Nrarp	47.8033	2.16478	0.696936	3.10613	0.00189551	0.0142099
Rgl3	3.06113	2.16259	1.04394	2.07157	0.0383059	0.145363
Entpd2	6.72331	2.15851	0.966234	2.23394	0.0254868	0.10802
Rab11fip1	16.752	2.15559	0.815465	2.64339	0.00820811	0.0454648
Tmem71	5.74976	2.15103	0.993415	2.16529	0.0303657	0.122753
Car12	91.4066	2.15048	0.557074	3.86032	0.000113241	0.0012852
Tmem176a	677.439	2.15033	0.292291	7.35683	1.88e-13	9.6e-12
2310030G06Rik	41.7195	2.14678	0.688016	3.12025	0.00180697	0.0136465
2610307P16Rik	7.45308	2.146	0.988417	2.17115	0.0299198	0.121433
Fgf21	3.01553	2.14554	1.04355	2.05601	0.0397818	0.149625
Acot7	1126.84	2.14417	0.273142	7.85001	4.16e-15	2.64e-13
Itga3	944.505	2.14218	0.343562	6.23521	4.51e-10	1.56e-08
Tmem108	2.97002	2.14078	1.04349	2.05156	0.0402127	0.150887
Gm19385	2.96013	2.14003	1.04351	2.0508	0.0402861	0.151112
Gm9845	2.91444	2.13863	1.04355	2.04939	0.0404239	0.151242
Gm40723	2.91444	2.13863	1.04355	2.04939	0.0404239	0.151242
Glt28d2	36.3281	2.13465	0.718162	2.97238	0.002955	0.0204641
Gm16938	3.70704	2.13429	1.04242	2.04743	0.0406154	0.151641
Gm30104	3.06127	2.13414	1.04315	2.04586	0.0407706	0.152101
Coq10a	17.8168	2.13308	0.761616	2.80073	0.00509878	0.0313937
Ces1f	2.93733	2.13257	1.04334	2.04399	0.0409543	0.152507
Bcl2l1	355.17	2.13084	0.30608	6.96171	3.36e-12	1.45e-10
Ly6g	3.73553	2.12888	1.04283	2.04144	0.041207	0.152969
Ptn	34.797	2.12818	0.576741	3.69	0.000224251	0.00234199
Sytl4	2.87462	2.12277	1.04316	2.03495	0.0418562	0.154734
Dapk2	36.1739	2.12105	0.606747	3.49578	0.000472676	0.00444509
Prom2	2.86884	2.12049	1.0431	2.03287	0.0420653	0.155266
Lpar4	5.59739	2.11794	0.994914	2.12877	0.0332737	0.131019
Gm4735	211.369	2.1178	0.3894	5.43863	5.37e-08	1.31e-06
Itpripl1	57.2603	2.11622	0.524182	4.03719	5.41e-05	0.000681733
Atf6b	5.37876	2.1132	0.98763	2.13967	0.0323818	0.128393
Adgrl2	62.4154	2.11166	0.501776	4.20837	2.57e-05	0.000355573
Irs1	129.525	2.1106	0.399188	5.28723	1.24e-07	2.88e-06
Map7d2	3.82113	2.10873	1.04407	2.01972	0.0434121	0.158758
Uaca	191.761	2.10312	0.404022	5.20544	1.94e-07	4.31e-06
Lyn	92.8678	2.10274	0.515994	4.07513	4.6e-05	0.000590527
Cebpb	95.736	2.10019	0.503528	4.17094	3.03e-05	0.000411658
Acpp	26.9143	2.09921	0.805812	2.60508	0.0091853	0.0497674
Gm5039	2.78487	2.09467	1.04249	2.0093	0.0445053	0.161638
Foxl2	2.76207	2.09137	1.04243	2.00625	0.0448292	0.162476
Mgam	2.77349	2.08995	1.04236	2.00502	0.0449608	0.162712
Uty	6.85827	2.08748	0.99199	2.10433	0.0353495	0.137149
Lsm5	25.9099	2.08659	0.858242	2.43124	0.0150472	0.0723937
Dach1	3.83959	2.08624	1.04438	1.99758	0.0457623	0.164444
Npsr1	3.06844	2.08542	1.04162	2.0021	0.0452745	0.163309
Osgin1	148.827	2.08516	0.414454	5.0311	4.88e-07	9.94e-06
L3hypdh	19.7607	2.0832	0.855954	2.43378	0.0149421	0.071964
Ptpn18	12.9097	2.08277	0.904998	2.3014	0.0213688	0.0945848
LOC108167368	2.82329	2.08186	1.04196	1.99803	0.0457136	0.164394
Cd70	2.82329	2.08186	1.04196	1.99803	0.0457136	0.164394
Esr2	2.75069	2.08045	1.04209	1.99643	0.0458877	0.164646
Has2	52.2337	2.08029	0.707623	2.93983	0.00328392	0.0223834
Rnf19a	57.4715	2.07957	0.529561	3.92697	8.6e-05	0.00101507
Tpd52	405.166	2.07903	0.296172	7.01967	2.22e-12	9.85e-11
Pstpip1	127.467	2.07871	0.570658	3.64265	0.000269845	0.00273236
Paip2b	8.56391	2.07683	0.938706	2.21244	0.0269361	0.112196
Slc25a48	2.85742	2.07662	1.04171	1.99347	0.0462103	0.165554
Pcdhb7	2.7678	2.07628	1.04191	1.99276	0.0462881	0.165646
Arhgap6	2.75064	2.07617	1.04194	1.99259	0.0463059	0.165647
Grm8	3.08258	2.075	1.04118	1.99293	0.046269	0.165646
Pdzrn4	3.59186	2.07444	1.04335	1.98825	0.0467841	0.166939
Rhov	3.65873	2.07241	1.0439	1.98526	0.0471158	0.167632
Lce3c	3.68782	2.0723	1.04007	1.99246	0.0463205	0.165658
Reep2	2.84614	2.07211	1.04158	1.9894	0.0466571	0.166569
Ly6e-ps1	3.60404	2.07123	1.04349	1.98491	0.0471543	0.167715
Mast1	2.71647	2.06607	1.04166	1.98343	0.0473195	0.168218
Gm26637	4.73224	2.06214	1.02804	2.0059	0.0448668	0.162496
Msln	670.101	2.06129	0.311748	6.61203	3.79e-11	1.47e-09
Gm6634	8.04065	2.06122	0.975313	2.11339	0.034567	0.13492
Scly	34.3496	2.06084	0.570956	3.60945	0.000306851	0.00304843
Lmx1a	2.71078	2.05941	1.04144	1.97746	0.0479892	0.169964
Gm31594	2.71078	2.05941	1.04144	1.97746	0.0479892	0.169964
Lrba	31.5858	2.05936	0.737501	2.79234	0.00523279	0.0320116
Prkcb	3.52618	2.05907	1.04426	1.9718	0.048632	0.171601
Eif5a	10.9984	2.05664	0.94036	2.18708	0.0287367	0.117906
LOC100862468	18.7064	2.05598	0.717389	2.86591	0.00415806	0.0268776
Tmem9	222.343	2.04981	0.333063	6.15441	7.54e-10	2.54e-08
Flrt3	136.998	2.04882	0.362529	5.65146	1.59e-08	4.23e-07
Adamts14	2.70509	2.04847	1.04106	1.96769	0.0491042	0.172883
Emp1	1653.18	2.04806	0.298439	6.86258	6.76e-12	2.84e-10
Bmyc	9.32644	2.04526	0.924886	2.21137	0.0270103	0.112416
Dll1	21.9412	2.04359	0.74	2.7616	0.00575184	0.0343905
Hap1	42.2369	2.04339	0.727905	2.80722	0.00499716	0.0309701
A330048O09Rik	3.4215	2.04324	1.03937	1.96584	0.0493166	0.173288
Dok4	3.41581	2.04199	1.03933	1.96472	0.0494464	0.173488
Cx3cl1	19.664	2.0395	0.830706	2.45514	0.0140831	0.0686169
Sema3e	120.609	2.03888	0.498965	4.08622	4.38e-05	0.000567091
Nrk	3.40444	2.03538	1.03908	1.95882	0.0501336	0.175339
Aebp1	141.205	2.02843	0.425474	4.76745	1.87e-06	3.39e-05
Pfkl	297.53	2.02798	0.4213	4.81362	1.48e-06	2.76e-05
Myod1	13.5626	2.02494	0.937184	2.16066	0.0307216	0.123806
Nbeal2	76.5569	2.02375	0.464068	4.3609	1.3e-05	0.000193089
Gm17592	8.98383	2.02355	0.907535	2.22972	0.0257662	0.108848
Gm20337	2.80049	2.02081	1.03974	1.94357	0.0519472	0.179612
Clcn2	3.76267	2.02	1.04635	1.93053	0.0535418	0.182813
Gm9831	3.38322	2.01801	1.03842	1.94334	0.0519751	0.179665
Sdsl	2.84031	2.01765	1.03952	1.94093	0.0522663	0.180229
Znrf2	90.6053	2.01728	0.494577	4.0788	4.53e-05	0.000583376
Fosb	2.68793	2.0166	1.03986	1.9393	0.0524647	0.180596
Gcnt4	2.67656	2.01475	1.03981	1.93761	0.0526708	0.180957
Slc9a3r1	246.792	2.01342	0.329054	6.11881	9.43e-10	3.14e-08
Gm42245	10.3617	2.01301	0.920128	2.18775	0.0286876	0.117738
Il13ra2	11.3873	2.01211	0.954908	2.10713	0.0351065	0.136391
Gm30136	2.64387	2.01135	1.03979	1.93438	0.0530661	0.18185
Akr1b3	18.1052	2.0097	0.777945	2.58335	0.00978472	0.0521816
Elmo3	15.3533	2.00734	0.834276	2.40609	0.0161245	0.0763972
Uchl4	4.31337	2.00711	1.0472	1.91664	0.0552836	0.186254
Kctd12	2.60396	2.00678	1.0397	1.93015	0.0535877	0.182873
Gm32600	2.63818	2.0035	1.03948	1.92741	0.053929	0.183682
Apc2	2.846	2.00316	1.03891	1.92814	0.0538375	0.183608
Ccnb2	238.895	2.00249	0.329905	6.0699	1.28e-09	4.15e-08
Sh3yl1	64.0195	2.00016	0.633584	3.15689	0.00159459	0.0123031
Eva1b	36.2909	2.00011	0.738502	2.70833	0.00676231	0.0390345
Gm46405	2.7278	2.00007	1.03908	1.92485	0.0542481	0.184227
Tmeff1	43.4189	1.99848	0.743622	2.68749	0.0071991	0.0409173
Prelid2	102.425	1.9979	0.545303	3.66384	0.000248464	0.0025464
Nostrin	2.61538	1.99765	1.03929	1.92213	0.0545894	0.184894
Mxra7	3.50291	1.99752	1.0454	1.91078	0.0560331	0.188353
Gm22980	2.59254	1.99601	1.03928	1.92058	0.054785	0.18516
Fut8	101.347	1.99528	0.517483	3.85574	0.000115381	0.00130223
Ppfia3	6.87333	1.99472	1.00247	1.98979	0.0466136	0.166497
Pfkfb3	145.111	1.99135	0.394678	5.04552	4.52e-07	9.28e-06
Ncoa4	3.46229	1.99059	1.04546	1.90402	0.0569072	0.190215
Fuca2	90.2306	1.9889	0.41134	4.83517	1.33e-06	2.51e-05
Lasp1	1383.91	1.98884	0.233472	8.51854	1.62e-17	1.41e-15
Ddit4	1307.78	1.98791	0.401456	4.95175	7.35e-07	1.45e-05
D7Ertd443e	2.65949	1.98787	1.03872	1.91378	0.0556486	0.187192
Grasp	75.6547	1.98653	0.465767	4.26506	2e-05	0.00028364
Rom1	25.9519	1.98643	0.756599	2.62547	0.00865301	0.0473872
Ccrl2	10.4745	1.98621	0.949325	2.09223	0.0364179	0.139999
Prrg3	2.56405	1.98581	1.03891	1.91144	0.0559484	0.188112
Rnf135	30.8195	1.98562	0.628259	3.16051	0.00157495	0.0121647
Gm13830	6.82768	1.98447	1.00329	1.97797	0.0479325	0.16989
Cd5	7.54964	1.98188	0.98926	2.0034	0.0451342	0.163021
Endod1	504.602	1.98152	0.291464	6.7985	1.06e-11	4.32e-10
Mboat1	112.222	1.98146	0.476447	4.15883	3.2e-05	0.000431466
Klk8	194.659	1.97955	0.787581	2.51346	0.0119553	0.0605232
Gm31546	3.2764	1.9776	1.03685	1.90732	0.0564786	0.189315
Ptpn13	220.956	1.97708	0.373525	5.29303	1.2e-07	2.8e-06
2210406O10Rik	4.05026	1.97642	1.0473	1.88716	0.0591391	0.194665
Pthlh	5.20708	1.97584	1.00882	1.95856	0.0501638	0.175401
Nfatc2	2.60969	1.9744	1.03829	1.9016	0.0572236	0.190781
H2ac4	2.56978	1.97387	1.03837	1.90094	0.0573097	0.190898
Tyro3	20.5858	1.97312	0.708575	2.78463	0.0053589	0.032532
Tm7sf2	17.4376	1.97171	0.897164	2.19771	0.0279697	0.115465
Gm7846	5.46441	1.96789	1.01515	1.93852	0.0525597	0.180733
4930447F24Rik	2.54125	1.9652	1.03805	1.89317	0.0583351	0.193267
Bax	27.6718	1.96514	0.766838	2.56266	0.0103875	0.0546212
Kc0b1	6.71803	1.95808	1.00579	1.94681	0.0515575	0.178741
Col5a3	6.91215	1.95743	1.03906	1.88385	0.0595858	0.195819
Irak2	127.938	1.95571	0.88231	2.21658	0.0266517	0.111434
Lrig1	5.92087	1.95218	1.02641	1.90195	0.057178	0.190718
Tgfbr3	51.552	1.95078	0.560478	3.48057	0.000500355	0.00465931
Gm20744	8.59297	1.94886	0.972721	2.00351	0.0451221	0.163021
Fndc10	44.7277	1.94829	0.683847	2.84902	0.00438545	0.027871
Icam4	4.43155	1.94796	1.03431	1.88334	0.059654	0.195998
Mpped2	13.609	1.94499	0.922757	2.1078	0.0350481	0.136239
Dhx58	4.0791	1.94286	1.04734	1.85504	0.0635908	0.204505
Lipo3	3.20939	1.9402	1.03519	1.87425	0.0608963	0.199117
Afp	21.8775	1.93956	0.780477	2.48509	0.0129519	0.0642683
Thbs2	124.283	1.93944	0.503217	3.85408	0.000116167	0.00130945
Cpsf4l	3.19228	1.93769	1.0351	1.87199	0.0612077	0.199836
C430002N11Rik	7.52996	1.93597	0.99813	1.93959	0.0524289	0.180577
Gm41338	2.53551	1.93574	1.03666	1.8673	0.0618603	0.201089
Gm13687	3.26422	1.93482	1.04605	1.84964	0.0643649	0.206158
2810414N06Rik	4.17493	1.93479	1.03257	1.87376	0.060963	0.199289
Igfals	3.27836	1.93458	1.0465	1.84862	0.064512	0.206352
Slc22a18	9.15764	1.9341	0.964511	2.00526	0.0449352	0.162661
Nupr1	234.766	1.93343	0.47313	4.08647	4.38e-05	0.000566986
Mageh1	3.1852	1.93225	1.03481	1.86725	0.061866	0.201089
Pcyt2	54.9388	1.93072	0.582169	3.31642	0.000911777	0.00771495
Snx21	6.38605	1.92977	1.00182	1.92626	0.0540721	0.183971
Mtmr10	78.8219	1.9295	0.467258	4.12941	3.64e-05	0.000481752
Loxl3	7.19356	1.92798	0.990576	1.94632	0.0516158	0.178776
Epha2	150.279	1.92726	0.494548	3.897	9.74e-05	0.00112592
Stard4	85.1086	1.92722	0.428742	4.49506	6.95e-06	0.000111233
Zfp354a	2.74649	1.92672	1.03564	1.86041	0.0628273	0.202875
Alpk2	3.16958	1.92613	1.03455	1.86181	0.0626305	0.202513
Palmd	52.5122	1.92423	0.561145	3.42911	0.000605564	0.0054299
Fut9	2.46865	1.92232	1.03622	1.85512	0.0635787	0.204505
Papln	5.1701	1.92102	1.01598	1.89081	0.0586491	0.193872
Arhgap18	97.9769	1.9187	0.55056	3.485	0.000492145	0.00459486
Tirap	80.0528	1.91861	0.46121	4.15994	3.18e-05	0.000430874
Smoc2	42.6554	1.9186	1.04545	1.83518	0.0664785	0.210263
Lypd6b	2.48576	1.91805	1.03596	1.85148	0.0641002	0.205588
Smim3	55.9515	1.91775	0.522817	3.66811	0.000244345	0.00251322
Acat2	332.411	1.91754	0.324009	5.91816	3.26e-09	9.72e-08
Rgs3	2.44585	1.9168	1.03601	1.85017	0.0642887	0.206019
Frat1	2.44585	1.9168	1.03601	1.85017	0.0642887	0.206019
Depdc1a	3.21294	1.91545	1.04631	1.83067	0.0671493	0.211796
Gm33616	2.46296	1.91466	1.03585	1.8484	0.0645446	0.20641
Crtc2	16.4862	1.91371	0.977245	1.95827	0	0
Oas3	6.42605	1.91349	1.00595	1.90216	0.05715	0.190669
Ccdc167	4.25213	1.91316	1.03444	1.84947	0.0643904	0.206189
E330034G19Rik	2.42874	1.91218	1.03582	1.84605	0.0648851	0.207081
Aplp1	3.18143	1.9118	1.04664	1.82661	0.067759	0.212965
Sema6a	2.63101	1.91156	1.03512	1.84671	0.064789	0.206867
G930009F23Rik	37.01	1.91066	0.717534	2.66282	0.00774893	0.0434744
Myc	68.536	1.91063	0.708722	2.69589	0.00702018	0.0401402
Cmtm6	86.4418	1.91023	0.473731	4.0323	5.52e-05	0.000693987
Slc7a11	392.625	1.90833	0.330529	5.77355	7.76e-09	2.17e-07
Coro1a	3.3111	1.908	1.04702	1.82231	0.0684084	0.214251
Eno1b	37.6086	1.9066	0.600237	3.17641	0.00149111	0.011656
Dedd2	59.6962	1.90478	0.605928	3.14357	0.00166901	0.0127943
Selp	2.5185	1.90444	1.0351	1.83987	0.065788	0.208841
Awat2	2.50287	1.90301	1.03512	1.83845	0.0659961	0.209269
Cebpd	245.566	1.90156	0.328004	5.79735	6.74e-09	1.91e-07
Gm52200	2.41732	1.89892	1.03516	1.83443	0.0665903	0.210451
Myo5c	2.55258	1.89519	1.0345	1.83199	0.0669535	0.211318
Fuom	37.6449	1.89412	0.712832	2.65718	0.00787972	0.0440102
Tpd52-ps	31.0878	1.89412	0.808069	2.34401	0.0190776	0.0867449
Actc1	2.41736	1.8939	1.03489	1.83006	0.0672413	0.211962
Gata2	5.30791	1.89217	1.02673	1.8429	0.0653439	0.208033
D17H6S56E-5	13.6318	1.89109	0.788423	2.39857	0.0164592	0.0774938
Oacyl	2.40025	1.89103	1.03478	1.82746	0.0676303	0.212701
D0jc11	148.133	1.88996	0.383029	4.93424	8.05e-07	1.57e-05
Rffl	2.423	1.88977	1.03464	1.8265	0.0677756	0.212971
Foxc2	112.363	1.88757	0.584772	3.22788	0.00124713	0.0100354
Slc25a45	34.6128	1.88723	0.77283	2.44198	0.0146072	0.0707484
Itgb7	58.8396	1.8868	0.567239	3.32629	0.000880111	0.00748698
Gm40139	2.39452	1.8834	1.03438	1.8208	0.0686377	0.214587
Cavin2	31.3449	1.88295	1.04208	1.80692	0.0707748	0.219161
Unc93b1	2.38883	1.88286	1.03437	1.8203	0.068713	0.214687
Ccdc88b	2.38883	1.88286	1.03437	1.8203	0.068713	0.214687
St3gal1	122.848	1.88225	0.47819	3.9362	8.28e-05	0.000984147
Rpl30-ps3	34.924	1.88162	0.687905	2.73529	0.00623247	0.0366347
Adam8	87.917	1.8816	0.469322	4.0092	6.09e-05	0.000755132
Fez1	3.19587	1.8803	1.04689	1.79609	0.0724797	0.221888
Myo1b	251.093	1.87793	0.344634	5.44906	5.06e-08	1.25e-06
Susd6	230.196	1.87789	0.496749	3.78036	0.0001566	0.00170539
Ctxn1	39.6942	1.87388	0.654172	2.86451	0.00417656	0.0269685
Ccdc141	8.07269	1.8726	0.97687	1.91694	0.0552458	0.186189
Mex3b	31.4583	1.87151	0.650511	2.87699	0.00401489	0.0261417
Gm40462	2.42869	1.87018	1.03353	1.80952	0.0703709	0.218431
1110002E22Rik	24.9714	1.86815	0.75908	2.46107	0.0138523	0.0677933
Proser2	82.1627	1.86622	0.452927	4.12036	3.78e-05	0.000497376
Hpcal1	369.325	1.8641	0.282785	6.59193	4.34e-11	1.66e-09
Ldhb-ps	2.49719	1.86361	1.03293	1.80419	0.0712012	0.219907
Atn1	22.3349	1.86309	0.839728	2.21868	0.0265085	0.111226
Htatip2	253.276	1.86139	0.320538	5.8071	6.36e-09	1.82e-07
Jmjd8	46.7193	1.85996	0.689889	2.69603	0.00701708	0.0401386
Gm28802	3.01716	1.85931	1.03119	1.80308	0.0713759	0.220162
Slc26a10	2.47439	1.85829	1.03269	1.79946	0.0719465	0.220753
Hsdl1	117.446	1.85796	0.4442	4.18272	2.88e-05	0.000392481
Slc16a6	14.3462	1.85677	0.940907	1.97338	0.0484524	0.171105
Cks2	16.2517	1.8563	0.800224	2.31972	0.0203559	0.0911834
Cks1brt	4.18177	1.85599	1.04657	1.77341	0.0761616	0.229662
Gm3571	30.4669	1.85459	0.64384	2.88051	0.00397031	0.0258868
Gm46069	2.36603	1.85313	1.03274	1.79439	0.0727508	0.222479
Ckb	29.1366	1.85014	0.739639	2.50141	0.0123699	0.0622468
Mrpl33	371.838	1.84956	0.298343	6.19944	5.67e-10	1.94e-08
Gm39584	7.62812	1.84615	0.969431	1.90436	0.0568629	0.190112
Dock4	2.45149	1.84386	1.0319	1.78686	0.0739599	0.225441
Gbp4	7.29881	1.84349	0.956586	1.92716	0.0539598	0.183682
St3gal4	51.0676	1.84347	0.602252	3.06095	0.00220635	0.0161332
Gdf15	52.3741	1.84214	0.509613	3.61479	0.000300595	0.0030051
Tle4	4.13249	1.84188	1.03861	1.7734	0.0761623	0.229662
Mpzl1	138.242	1.84105	0.355444	5.17958	2.22e-07	4.89e-06
Hes6	256.848	1.83609	0.362951	5.05878	4.22e-07	8.74e-06
Trib3	48.476	1.83347	1.02854	1.78259	0.074653	0.226789
Itgb2	2.93011	1.83321	1.02976	1.78022	0.0750395	0.227411
Cldn6	3.02327	1.83113	1.04727	1.74849	0.0803799	0.237559
Hs1bp3	126.524	1.83041	0.465616	3.93116	8.45e-05	0.00099916
Fam187b	7.3718	1.82978	1.01437	1.80386	0.0712529	0.219907
Rundc3b	2.31623	1.8293	1.03151	1.77341	0.076161	0.229662
Aloxe3	3.95564	1.82798	1.03809	1.7609	0.0782553	0.233848
Eppk1	32.4347	1.82705	0.63107	2.89516	0.00378967	0.0249831
D3Ertd751e	11.5314	1.82545	0.826695	2.20813	0.0272351	0.113173
Mfap3l	51.8338	1.8238	0.540839	3.37216	0.000745813	0.0064619
Ephx2	31.1426	1.82318	0.640344	2.84719	0.00441071	0.0279783
Aox1	6.49797	1.82221	0.979939	1.85952	0.0629539	0.203098
Fxyd4	3.17928	1.82087	1.02839	1.7706	0.076627	0.230536
Gm13578	2.28774	1.82072	1.03108	1.76585	0.0774218	0.232282
Atxn7l3	5.24853	1.82062	0.984042	1.85015	0.0642923	0.206019
Tmprss11f	2.9315	1.82048	1.02898	1.7692	0.0768601	0.230937
Cidea	2.27063	1.82019	1.0311	1.76528	0.0775166	0.232384
Tmem238	131.858	1.81958	0.844784	2.1539	0.0312477	0.125184
Egfl7	27.1372	1.81948	0.648694	2.80484	0.00503422	0.0311305
Cdc25c	23.6257	1.81879	0.640985	2.83749	0.00454704	0.0287052
Exosc3	18.8412	1.81814	0.855589	2.12501	0.0335856	0.131956
Gla	31.5323	1.81564	0.781207	2.32414	0.0201178	0.0904224
Mafb	51.8717	1.81285	0.588726	3.07927	0.00207506	0.0153484
Morrbid	52.316	1.81256	0.552922	3.27815	0.00104491	0.00863659
Ifitm3	6201.78	1.81225	0.287163	6.3109	2.77e-10	9.68e-09
Spink2	2.25352	1.81192	1.03064	1.75805	0.0787382	0.234554
Gpat3	9.61994	1.81115	0.910313	1.98959	0.0466366	0.166538
Nkain3	2.91874	1.81071	1.02835	1.76079	0.0782743	0.233856
Bmp3	2.30485	1.81052	1.03036	1.75717	0.0788891	0.234709
Hs3st5	2.30485	1.81052	1.03036	1.75717	0.0788891	0.234709
Slc35f1	2.26494	1.80981	1.03046	1.75631	0.0790355	0.234987
Mdrl	6.83128	1.80912	0.995988	1.81641	0.0693075	0.216071
Sox9	2639.69	1.80806	0.260119	6.95089	3.63e-12	1.56e-10
Gm52912	3.69725	1.80777	1.04665	1.7272	0.0841309	0.244691
Paox	261.226	1.80718	0.333259	5.42274	5.87e-08	1.43e-06
Gm34983	2.38319	1.80571	1.02972	1.7536	0.0794998	0.236083
5033406O09Rik	2.2649	1.80494	1.03014	1.75213	0.0797515	0.236486
Eif2s3y	50.9557	1.80453	0.50941	3.5424	0.000396498	0.00380905
Ripor3	3.62675	1.80374	1.04679	1.72312	0.0848668	0.246067
Gm20324	9.73615	1.80298	0.928075	1.94271	0.0520515	0.179711
Gm21814	2.2877	1.80249	1.0299	1.75016	0.0800906	0.236901
Gm7482	5.44433	1.79695	1.0007	1.79569	0.0725442	0.222037
Mmd	183.136	1.79611	0.352009	5.10244	3.35e-07	7.07e-06
Arhgap9	2.23641	1.79604	1.02966	1.7443	0.0811067	0.238966
Spryd4	20.6921	1.79316	0.725881	2.47032	0.0134991	0.066455
Aqp5	34.8378	1.79185	0.669777	2.67529	0.00746638	0.0420512
Stom	58.698	1.79114	0.479655	3.73423	0.000188292	0.00201061
Ptprk	334.075	1.79096	0.295177	6.06741	1.3e-09	4.2e-08
Haspin	9.59846	1.78997	0.964588	1.85568	0.0634994	0.204396
Syt4	2.86474	1.78931	1.02712	1.74207	0.0814965	0.239767
Tiam2	14.6206	1.78845	0.793494	2.25389	0.0242032	0.103907
Akt1s1	16.3031	1.78786	0.791187	2.25972	0.0238387	0.102775
Zfp239	8.33856	1.78764	0.977784	1.82826	0.0675107	0.212372
Csf1r	2.82473	1.78628	1.02702	1.73929	0.0819837	0.240852
Cnbd2	2.24779	1.78598	1.02894	1.73574	0.0826093	0.241813
Gm5855	60.8814	1.78471	0.492533	3.62353	0.000290607	0.00291958
Tssk4	2.80044	1.78454	1.02693	1.73775	0.0822542	0.2412
Cdk20	35.35	1.78421	0.651121	2.74021	0.00613997	0.0362253
Stap2	25.5494	1.78273	0.678475	2.62756	0.00859996	0.0471149
Mvd	76.6744	1.77911	0.511843	3.47589	0.000509162	0.00473206
Gm12366	29.8832	1.77822	0.718896	2.47355	0.0133779	0.0659695
Tlcd5	3.65883	1.77802	1.03629	1.71575	0.086208	0.248403
Camk4	29.9192	1.77728	0.734947	2.41824	0.0155959	0.0744365
Npr1	2.32197	1.77708	1.02806	1.72858	0.0838845	0.244224
Gm13846	2.32197	1.77708	1.02806	1.72858	0.0838845	0.244224
Casq2	22.0083	1.77678	0.701008	2.53461	0.0112572	0.0578454
Tubb3	165.197	1.776	0.376412	4.71822	2.38e-06	4.16e-05
Ifnlr1	15.0209	1.77564	0.851333	2.08572	0.0370038	0.141567
Nt5e	118.423	1.77345	0.442002	4.0123	6.01e-05	0.000747232
Spsb4	2.23646	1.77206	1.02803	1.72375	0.0847534	0.2459
Rassf7	126.36	1.77041	0.409475	4.3236	1.54e-05	0.000224831
Tjp2	537.091	1.77035	0.268898	6.58374	4.59e-11	1.74e-09
B2m	5480.66	1.7703	0.246629	7.17799	7.07e-13	3.32e-11
Mpzl3	88.6031	1.77009	0.486796	3.63622	0.000276672	0.00279137
Ankrd13d	8.50178	1.7699	0.973697	1.81771	0.069108	0.215685
Aqp3	13.6951	1.76936	0.881962	2.00617	0.0448386	0.162476
Pllp	2.37736	1.76902	1.02724	1.7221	0.0850512	0.246214
Lgi2	2.21361	1.76901	1.0279	1.72099	0.0852522	0.246495
Tac1	2.25347	1.7683	1.0277	1.72064	0.0853157	0.246579
Pitx3	2.93313	1.76794	1.02546	1.72404	0.0847005	0.245797
Tmem212	2.20792	1.76436	1.02759	1.71698	0.0859828	0.247934
Gm35035	2.8853	1.76417	1.04735	1.68442	0.0921	0.259869
Dcbld2	279.537	1.76411	0.329406	5.35543	8.54e-08	2.03e-06
Hk2	119.193	1.76281	0.459405	3.83717	0.00012446	0.0013904
Notch3	29.4116	1.76178	0.778256	2.26375	0.0235895	0.101947
Gm41032	17.0063	1.76155	0.870396	2.02385	0.0429852	0.157642
Mab21l3	11.3763	1.76102	0.916622	1.92121	0.0547054	0.184998
Iglon5	2.27637	1.7594	1.02698	1.71317	0.0866807	0.249211
Rab42	3.93443	1.75766	1.04188	1.68702	0.0915998	0.258816
Epn2	266.073	1.75625	0.346678	5.06593	4.06e-07	8.49e-06
Klra4	127.586	1.75598	0.403245	4.35461	1.33e-05	0.000198304
Gm2260	3.95154	1.75456	1.04271	1.6827	0.0924338	0.260399
Cdh15	9.72296	1.7525	0.936493	1.87134	0.061298	0.199905
Rabggta	95.7659	1.75017	0.403607	4.33633	1.45e-05	0.000214408
Zfp518b	76.5978	1.74882	0.967363	1.80783	0.0706337	0.218961
Tmem229b	19.5959	1.74711	0.831677	2.10071	0.0356665	0.138003
Hmga2-ps1	7.76268	1.74683	0.95268	1.8336	0.0667141	0.210749
Tnfaip8l1	51.3878	1.74402	0.540304	3.22786	0.00124722	0.0100354
Znhit3	5.67958	1.73913	1.01654	1.71082	0.0871141	0.249702
Dhcr7	118.523	1.73746	0.440209	3.94689	7.92e-05	0.000950734
Ube2n	56.2543	1.73581	0.518574	3.34727	0.000816102	0.00700512
Pim3	496.976	1.73451	0.24935	6.95613	3.5e-12	1.51e-10
Ppp2cb	79.3698	1.73397	0.952741	1.81998	0.0687614	0.214744
Tmem130	2.14101	1.73273	1.02562	1.68945	0.091134	0.258062
Slc5a8	18.2656	1.73106	0.905081	1.91261	0.0557984	0.187652
C130046K22Rik	4.6198	1.72881	1.03214	1.67498	0.0939375	0.262613
Ntf5	8.41909	1.72858	0.929563	1.85956	0.0629473	0.203098
Gpr35	3.63649	1.72618	1.02081	1.69099	0.0908392	0.257585
Slc5a3	102.246	1.7256	0.516488	3.34102	0.000834718	0.00714771
Gm32861	2.70085	1.72523	1.02296	1.6865	0.0916996	0.259047
Snord14d	2.18092	1.72485	1.02486	1.68301	0.092373	0.260331
Bcl2l11	63.4894	1.72348	0.511448	3.36981	0.000752199	0.0065075
Cryaa	26.3554	1.72137	0.859573	2.00259	0.0452211	0.163199
Fancc	16.3099	1.72133	0.876568	1.96372	0.049563	0.173684
Fut4	2.11252	1.72116	1.02486	1.67941	0.0930717	0.26137
Slc4a4	101.768	1.71986	0.40376	4.25961	2.05e-05	0.000289251
Gm1965	2.19081	1.71931	1.02433	1.67848	0.0932536	0.261719
Gm29257	39.716	1.71905	0.823667	2.08706	0.0368824	0.14127
3110045C21Rik	2.19086	1.71864	1.02427	1.67791	0.0933656	0.261835
Rorb	2.8632	1.71858	1.04718	1.64116	0.100764	0.275278
Gm10327	8.20422	1.71816	0.925833	1.8558	0.0634825	0.204396
Hsd17b12	356.66	1.71643	0.30206	5.68241	1.33e-08	3.58e-07
Nrg1	185.583	1.71642	0.529311	3.24275	0.00118381	0.00959012
Slc27a6	2.12959	1.71464	1.02428	1.67399	0.0941328	0.263004
Myl7	54.7965	1.71449	0.54898	3.12305	0.00178988	0.0135318
Mex3c	186.402	1.71225	0.383791	4.46141	8.14e-06	0.00012878
Ccdc120	23.0555	1.71064	0.650143	2.63117	0.00850921	0.0467074
H4c8	5.83632	1.70708	0.989564	1.72508	0.084513	0.245403
Inpp4b	34.2438	1.70516	0.65243	2.61355	0.00896074	0.0488289
Fgfbp3	33.1234	1.70489	0.599841	2.84224	0.00447976	0.0283533
Wdr66	2.17943	1.70426	1.02319	1.66563	0.0957876	0.266167
Zfp418	2.75568	1.7034	1.04722	1.6266	0.103822	0.281208
Prss56	2.11248	1.70177	1.02334	1.66295	0.0963221	0.266925
Rdh5	43.3135	1.7014	1.04714	1.62482	0.104202	0.281863
Cyp39a1	10.9246	1.70139	0.958872	1.77436	0.0760029	0.229521
Rnf19b	137.604	1.70043	0.466595	3.64434	0.000268078	0.00272005
Nt5dc2	198.258	1.69874	0.380415	4.46549	7.99e-06	0.000126768
C130013N14Rik	2.07261	1.69829	1.02324	1.65972	0.0969703	0.268202
Arap3	2.62112	1.69724	1.021	1.66233	0.0964469	0.267219
Col4a3	14.7374	1.69633	0.943209	1.79846	0.0721036	0.221068
Shroom4	27.0611	1.69597	0.744662	2.2775	0.0227565	0.0992548
Mrps28	48.7644	1.69533	0.782497	2.16657	0.030268	0.122493
Cstb	1078.7	1.69273	0.289521	5.84667	5.02e-09	1.46e-07
Ntf3	2.71279	1.69169	1.04697	1.6158	0.106138	0.285422
Syt17	16.827	1.69155	0.913137	1.85247	0.063959	0.205273
4930471G24Rik	2.16955	1.69113	1.02225	1.65433	0.0980608	0.270241
0p1l2	6.10965	1.69029	1.00706	1.67844	0.0932608	0.261719
Lamb1	508.347	1.68966	0.303258	5.57168	2.52e-08	6.56e-07
Gm19510	5.47573	1.68937	1.01929	1.65739	0.09744	0.268978
Asap2	16.0174	1.68793	0.789682	2.13748	0.0325587	0.128844
Bcar3	80.8249	1.6874	0.443963	3.80077	0.00014425	0.00158419
Zdhhc13	48.1048	1.68732	0.583854	2.88997	0.00385278	0.025282
Lama3	390.153	1.68719	0.335173	5.03379	4.81e-07	9.83e-06
Exo1	66.0752	1.68715	0.488917	3.45079	0.000558957	0.00510035
F3	18.0901	1.68684	0.892422	1.89019	0.0587332	0.193922
Ccdc88c	60.9947	1.68628	0.56415	2.98907	0.00279832	0.019569
Gm19426	6.10396	1.68558	1.00787	1.67241	0.0944431	0.263458
Ppp4c	42.6924	1.68518	1.04248	1.61652	0.105982	0.285191
Cog3	16.0696	1.6849	0.925207	1.82111	0.0685901	0.214491
Ehd1	13.2137	1.6843	0.837602	2.01085	0.044341	0.161235
Akap12	157.321	1.68412	1.01541	1.65857	0.0972033	0.268617
Tgif1	389.769	1.68356	0.39851	4.22465	2.39e-05	0.000333734
Tmem221	2.09536	1.68315	1.02191	1.64707	0.0995432	0.27288
Acap1	2.09536	1.68315	1.02191	1.64707	0.0995432	0.27288
Baiap2l1	20.9321	1.6807	0.774973	2.16872	0.030104	0.121972
Rin2	131.392	1.67862	0.439828	3.81654	0.000135336	0.00149551
Pdzrn3	287.547	1.67839	0.435046	3.85796	0.000114336	0.00129453
B4galt3	129.009	1.67806	0.381117	4.40299	1.07e-05	0.000162729
Pemt	15.2576	1.67795	0.859496	1.95225	0.0509088	0.177354
Dok3	4.39667	1.67733	1.03008	1.62835	0.10345	0.28036
Ephb4	63.0662	1.67732	0.482875	3.47362	0.000513487	0.00476887
Slc39a8	14.747	1.67632	0.839919	1.99581	0.0459549	0.164784
Gm35333	2.72145	1.67497	1.04697	1.59983	0.109636	0.291531
Phf13	101.332	1.67398	0.455104	3.67824	0.000234854	0.00243136
Dglucy	271.089	1.67306	0.284458	5.88157	4.06e-09	1.19e-07
Tpd52l1	143.069	1.67301	0.342886	4.87919	1.07e-06	2.04e-05
Spred3	9.57066	1.67214	0.913773	1.82993	0.0672608	0.211962
Nradd	611.823	1.6716	0.313978	5.32396	1.02e-07	2.39e-06
n-TRacg3	2.04981	1.67029	1.02103	1.63588	0.101865	0
Gm19497	2.59818	1.67026	1.01885	1.63936	0.101138	0.2761
Rbpj	230.051	1.66949	0.307628	5.42698	5.73e-08	1.4e-06
Ltb4r2	8.92921	1.66721	0.930971	1.79083	0.0733203	0.22398
Gm39391	2.60821	1.66658	1.01847	1.63636	0.101765	0.27711
Rps2-ps8	6.28261	1.66638	0.958601	1.73835	0.0821494	0.241005
Cd82	6.51964	1.66614	0.973213	1.712	0.0868959	0.249451
H2ac6	21.1103	1.66581	1.01031	1.64881	0	0
Pgam1-ps1	6.99175	1.66405	0.9391	1.77196	0.0764008	0.23009
Mfsd4b4	7.28071	1.66085	1.00333	1.65534	0.0978559	0.269865
Ak0	5.72945	1.65938	0.996746	1.6648	0.0959524	0.266418
Gm8034	77.17	1.65926	0.602193	2.75536	0.00586283	0.0349092
Yae1d1	12.615	1.65897	0.870651	1.90543	0.0567239	0.189736
Hpdl	4.09875	1.65842	1.02627	1.61597	0.1061	0.285375
Pcbp3	16.8732	1.65773	0.816081	2.03133	0.0422212	0.155664
Mthfs	14.9182	1.65746	0.857432	1.93306	0.0532292	0.182059
Fabp5	124.58	1.65246	0.403489	4.09543	4.21e-05	0.000547998
Zfp750	23.6067	1.65148	0.712797	2.3169	0.020509	0.091747
Gstk1	69.6893	1.64998	0.556542	2.9647	0.0030298	0.0208808
Pde4a	28.0827	1.64966	0.727782	2.2667	0.0234084	0.10141
1700001G11Rik	2.10105	1.64824	1.01891	1.61764	0.10574	0.284816
Smpdl3a	2.07835	1.64726	1.01893	1.61666	0.105952	0.285191
Gm7898	35.9267	1.64678	0.729202	2.25833	0.023925	0.103021
Adi1	106.877	1.64605	0.405651	4.0578	4.95e-05	0.000630424
Ddhd1	47.451	1.64289	0.574628	2.85905	0.00424911	0.0272439
Socs2	234.399	1.64288	0.350063	4.69311	2.69e-06	4.63e-05
Rpa3	33.368	1.64207	0.684051	2.40051	0.0163722	0.0772373
Med30	36.7128	1.64137	0.730324	2.24745	0.0246113	0.105153
Socs6	330.352	1.64095	0.324666	5.05427	4.32e-07	8.92e-06
Ier3	44.7905	1.64087	0.69746	2.35263	0.0186411	0.0853173
Il18r1	33.1047	1.63989	1.04617	1.56753	0.116992	0.304286
Gprin2	4.0675	1.63761	1.02671	1.59501	0.11071	0.293293
Depdc1b	7.50502	1.63699	0.975386	1.6783	0.0932893	0.261724
Lxn	213.643	1.63679	0.348434	4.69757	2.63e-06	4.54e-05
Crip2	17.8825	1.63606	0.701954	2.33072	0.0197679	0.0892876
Pxmp2	16.1658	1.63543	0.849657	1.92482	0.0542523	0.184227
Atf3	12.989	1.63449	0.873153	1.87195	0.0612142	0.199836
Ncstn	74.6321	1.63413	0.479697	3.40659	0.000657787	0.00582857
Tmem95	4.18565	1.63376	1.0307	1.58511	0.112942	0.297495
Zbtb8b	2.04977	1.63324	1.01781	1.60467	0.108566	0
Gpr68	7.22236	1.63241	1.00702	1.62103	0.105011	0.283407
Serpinb9b	179.674	1.63071	0.407553	4.00122	6.3e-05	0.000777017
Acsbg3	1.96579	1.63037	1.01802	1.60151	0.109263	0
Samd10	48.6929	1.63031	0.521455	3.12646	0.00176924	0.0134122
Cxcl16	2.0057	1.62919	1.01772	1.60082	0.109416	0
Prkcd	129.707	1.62874	0.357591	4.55476	5.24e-06	8.56e-05
Rassf10	18.6807	1.62813	0.867471	1.87687	0.0605359	0.198003
Gm38426	54.4676	1.62762	0.550825	2.95487	0.003128	0.0214539
Plekhf1	55.583	1.62722	0.6872	2.36791	0.0178891	0.0827248
Capg	1300.82	1.62638	0.269981	6.02406	1.7e-09	5.38e-08
Gypc	5.34056	1.62615	1.02553	1.58566	0.112815	0.297326
Csta2	2.05545	1.62612	1.01714	1.59872	0.109882	0
1110019D14Rik	9.5287	1.62591	0.944115	1.72215	0.0850418	0.246214
Qrich2	2.47429	1.62564	1.01538	1.60102	0.109373	0.291048
Wrnip1	109.072	1.62464	0.410229	3.96033	7.48e-05	0.00090313
Pigh	2.68308	1.62448	1.04618	1.55277	0.120477	0.310239
Abcd4	63.9831	1.62418	0.54882	2.9594	0.00308238	0.0211919
Gins1	52.1807	1.62257	0.553632	2.93077	0.00338121	0.0228175
n-TGccc4	1.97721	1.62249	1.01725	1.59499	0.110716	0
Krt27	1.94299	1.62228	1.01739	1.59455	0.110813	0
Slc2a3	1.94868	1.62135	1.01728	1.59381	0.110978	0
Kcnk6	1.94868	1.62135	1.01728	1.59381	0.110978	0
Sema6b	1.94868	1.62135	1.01728	1.59381	0.110978	0
Llgl2	93.1307	1.62076	0.415847	3.89749	9.72e-05	0.00112457
Slc38a1	117.144	1.62042	0.413912	3.91488	9.04e-05	0.0010581
Hook1	36.3328	1.62024	0.646596	2.5058	0.0122175	0.06161
Gm14038	2.64966	1.61634	1.04616	1.54501	0.122343	0.313163
9030607J07Rik	1.9373	1.6153	1.01678	1.58865	0.112139	0
Sat1	86.1022	1.61496	0.555166	2.90897	0.00362621	0.0241227
Egr3	9.60114	1.61481	1.01974	1.58355	0.113297	0.29799
Mxi1	96.9245	1.612	0.407053	3.96019	7.49e-05	0.00090313
Igf2r	239.276	1.61075	0.432606	3.72337	0.000196584	0.0020851
H2ax	254.47	1.61035	0.299595	5.37511	7.65e-08	1.83e-06
Wfs1	37.4393	1.60958	0.634877	2.53526	0.0112364	0.0578454
Gm36897	2.02133	1.6093	1.01574	1.58436	0.113111	0
Apol9a	23.9273	1.60899	0.797776	2.01684	0.0437122	0.159529
Gm35037	1.93157	1.60597	1.01593	1.58078	0.113927	0
Gm16685	2.0285	1.605	1.01538	1.5807	0.113948	0
Efcab1	5.13107	1.60345	1.02351	1.56662	0.117203	0.304446
Ptchd4	45.6677	1.60345	0.742936	2.15826	0.0309078	0.124276
Dapk1	252.87	1.60152	0.4582	3.49524	0.000473632	0.00444821
Cpn1	1.93162	1.59868	1.01524	1.57468	0.115331	0
Slc6a4	1.9145	1.59688	1.01515	1.57304	0.115709	0
Galnt12	50.6298	1.59643	0.486264	3.28305	0.0010269	0.00851729
D730005E14Rik	26.4461	1.59616	0.673686	2.36929	0.0178222	0.0825224
Gm2574	29.2342	1.59556	0.671147	2.37737	0.0174367	0.0812117
Bpnt1	91.4795	1.5953	0.565114	2.82297	0.00475812	0.0297847
Triobp	174.65	1.59394	0.398041	4.00445	6.22e-05	0.000767793
Greb1	71.5649	1.5937	0.54039	2.94916	0.00318635	0.0218121
Zfp280b	27.5237	1.5936	0.72173	2.20803	0.0272421	0.113173
Tent5b	115.961	1.59273	0.571733	2.7858	0.00533955	0.0324467
Saysd1	36.4436	1.58995	0.553388	2.87311	0.00406447	0.0263802
Lzic	74.9971	1.58921	0.507035	3.13431	0.00172257	0.0131624
Tarm1	1.97153	1.58916	1.01413	1.56702	0.11711	0
Ccdc125	3.38177	1.5888	1.04491	1.52051	0.128383	0.322619
Zbtb42	26.2591	1.58585	1.04533	1.51709	0.129245	0.323434
Ctdp1	41.3306	1.58472	0.548298	2.89025	0.00384936	0.0252715
Kif26a	19.1112	1.58333	0.826316	1.91614	0.0553478	0.186356
C330013E15Rik	1.91446	1.58197	1.01371	1.56058	0.118624	0
Gprc5c	1.89739	1.58054	1.01365	1.55925	0.118936	0
Gm34765	6.4145	1.57969	0.992058	1.59234	0.111309	0.294353
Gm12537	8.71868	1.57562	0.889053	1.77225	0.0763534	0.229995
Tnk2	472.69	1.57544	0.283473	5.55763	2.73e-08	7.07e-07
Dimt1	9.31933	1.57539	0.932111	1.69014	0.0910021	0.257841
Zcchc3	47.16	1.5752	0.663079	2.37558	0.0175215	0.0815003
Spire2	2.53486	1.57413	1.0455	1.50563	0.132162	0.328298
Ccl20	7.38263	1.57409	0.988948	1.59168	0.111456	0.294619
Fasn	790.371	1.57208	0.32491	4.83851	1.31e-06	2.47e-05
Gm39822	1.92015	1.56882	1.01237	1.54965	0.121226	0
Gm4675	5.05269	1.56841	1.02655	1.52784	0.126551	0.319593
Lnx2	115.639	1.56708	0.403012	3.88843	0.000100896	0.00116079
Syt8	129.546	1.56701	0.421754	3.71547	0.000202828	0.0021402
Cmtm8	2.3375	1.56687	1.01023	1.551	0.120902	0.310997
Rgs14	2.33181	1.56637	1.0102	1.55055	0.121009	0.311215
Fam110c	94.6383	1.56446	0.517424	3.02357	0.00249815	0.0178816
Mgat3	25.3639	1.56302	0.78712	1.98575	0.0470615	0.167552
Abcb1b	30.9137	1.56215	0.672949	2.32135	0.0202682	0.0909265
Cxxc5	11.7415	1.56159	0.922098	1.69352	0.0903562	0.256624
Gm5507	19.0174	1.56147	0.750448	2.08071	0.0374602	0.142813
Mtg1	33.9619	1.56102	0.623129	2.50513	0.0122408	0.0617055
Mroh3	2.38468	1.55937	1.00936	1.54491	0.122369	0.313163
Gm15727	10.921	1.55814	0.890731	1.74929	0.0802417	0.237205
Gm13453	81.1626	1.55609	0.502715	3.09537	0.00196568	0.0146973
E230016K23Rik	4.98438	1.55581	1.02671	1.51534	0.129687	0.32407
Akap10	12.3768	1.55487	0.853215	1.82237	0.0683992	0.214251
Lancl3	17.8504	1.55376	0.774077	2.00725	0.0447233	0.162223
Bex3	598.713	1.55339	0.285363	5.44354	5.22e-08	1.28e-06
Ces2e	87.4863	1.55287	0.423743	3.66466	0.000247667	0.00254006
Fgf2	2.31474	1.55265	1.00887	1.53899	0.123806	0.315587
Tal2	4.2295	1.55194	1.04184	1.48961	0.136327	0.335087
Pcdh9	2.00995	1.55169	1.01013	1.53613	0.124505	0
9530034E10Rik	2.48506	1.55059	1.04512	1.48365	0.137902	0.336694
Eid2	31.9861	1.55035	0.758304	2.04449	0.0409047	0.152442
Gimap9	79.8852	1.54988	0.980416	1.58084	0.113915	0.299118
Tfrc	629.431	1.54961	0.245393	6.31484	2.7e-10	9.48e-09
Sdhd	63.3665	1.54957	0.987988	1.56841	0.116786	0.303972
Wdr92	24.9812	1.54863	0.744864	2.07908	0.0376104	0.143195
Tmem184a	53.2011	1.54856	0.562685	2.7521	0.00592152	0.0351838
Cdc14a	4.5925	1.5481	1.01605	1.52365	0.127596	0.321378
Lamc3	2.50292	1.54768	1.04495	1.48111	0.138578	0.337331
Stxbp2	294.888	1.54732	0.392084	3.94639	7.93e-05	0.000951927
Ccnd1	502.098	1.54706	0.303827	5.0919	3.54e-07	7.44e-06
Ints8	7.15965	1.54636	0.994403	1.55506	0.119932	0.309449
Eda2r	56.5164	1.54635	0.479175	3.22711	0.00125046	0.0100559
Gm36090	1.88597	1.54559	1.01017	1.53004	0.126008	0
Oprm1	1.88597	1.54559	1.01017	1.53004	0.126008	0
Gm22973	1.88597	1.54559	1.01017	1.53004	0.126008	0
Gm15361	82.4843	1.54387	0.559477	2.75949	0.00578912	0.0345496
Vmn2r79	1.88028	1.54261	1.00989	1.52751	0.126635	0
Mfsd4b3-ps	1.90313	1.54198	1.00971	1.52715	0.126723	0
B930059L03Rik	2.29348	1.54155	1.00785	1.52954	0.126131	0.319097
Cltb	470.812	1.54133	0.340618	4.5251	6.04e-06	9.77e-05
Gcat	73.4134	1.54032	0.526536	2.92539	0.0034403	0.0231397
Swap70	75.8444	1.53995	0.529632	2.90758	0.00364241	0.0241912
Gosr1	24.1734	1.53968	0.692993	2.22179	0.0262975	0.110667
Lepr	2.44441	1.5391	1.00699	1.52842	0.126408	0.319496
Apoo-ps	2.44441	1.5391	1.00699	1.52842	0.126408	0.319496
Ctsc	116.82	1.53833	0.408508	3.76573	0.000166063	0.00179883
Cxcr3	1.92583	1.5379	1.00916	1.52394	0.127524	0
Gm38851	3.06826	1.53761	1.04467	1.47186	0.141058	0.341363
Sinhcaf	8.15101	1.53669	0.987233	1.55657	0.119573	0.308636
Wdr36	402.534	1.53524	0.290961	5.27646	1.32e-07	3.03e-06
Ifi205	5.18918	1.53389	1.03555	1.48123	0.138547	0.337331
Trim66	5.83703	1.53386	1.02062	1.50288	0.13287	0.329376
Gm36551	10.42	1.53311	0.904616	1.69476	0.0901202	0.256056
Tmem190	1.83048	1.52743	1.00863	1.51436	0.129935	0
Cspg4b	1.83048	1.52743	1.00863	1.51436	0.129935	0
Gm9027	10.595	1.52639	0.855934	1.78331	0.0745365	0.226628
Adamts4	39.4534	1.52602	0.586265	2.60295	0.00924267	0.0499802
Stac	2.43027	1.5252	1.00565	1.51663	0.129361	0.323537
Prl2c5	81.9061	1.52416	0.56278	2.70827	0.00676358	0.0390345
Nme4	253.619	1.52232	0.335973	4.53109	5.87e-06	9.51e-05
Abcd1	23.0306	1.52198	0.800655	1.90091	0.0573135	0.190898
Dtwd1	84.9871	1.52082	0.496768	3.06143	0.00220284	0.0161198
Phlda1	957.158	1.52078	0.261349	5.81898	5.92e-09	1.7e-07
Plek2	145.891	1.52076	1.00394	1.51479	0.129825	0.3243
Nxpe3	37.5985	1.52031	0.56738	2.67953	0.00737249	0.0416373
Nfkb1	111.303	1.51893	0.530587	2.86273	0.00420008	0.0270568
Gusb	116.494	1.51878	0.499553	3.04029	0.00236351	0.0170723
Gm24289	3.77977	1.51854	1.03377	1.46893	0.141852	0.342355
Tnnc1	3.43013	1.51829	1.04726	1.44977	0.147123	0.349413
Ints11	7.46776	1.51737	0.971544	1.56181	0.118332	0.306383
Procr	447.477	1.51615	0.275854	5.4962	3.88e-08	9.78e-07
Gnb1	1160.22	1.5157	0.229683	6.59908	4.14e-11	1.59e-09
Bend3	5.59045	1.51497	1.0182	1.48788	0.136782	0.335709
Slc35g1	28.1012	1.51487	0.695685	2.17752	0.0294418	0.119902
Ercc6l	78.5716	1.51468	0.462039	3.27824	0.00104456	0.00863659
Agr2	4.01923	1.51457	1.03869	1.45816	0.144797	0.34694
Rps6ka3	123.431	1.51344	0.439618	3.44263	0.00057609	0.00520818
Gm17799	11.0668	1.51028	0.843532	1.79042	0.0733867	0.224135
Gm3716	1.85328	1.508	1.00639	1.49843	0.134021	0
Chst4	2.26485	1.50798	1.00436	1.50144	0.133243	0.3299
Gm12514	10.1431	1.50613	0.978328	1.5395	0.123683	0.315477
4930579K19Rik	1.83617	1.50597	1.00625	1.49661	0.134494	0
Gcnt3	2.81761	1.50471	1.03995	1.44691	0.147921	0.350597
Etv3	29.759	1.50428	0.651625	2.3085	0.0209712	0.09323
Psrc1	193.277	1.50396	0.382106	3.93597	8.29e-05	0.000984271
Csrp2	191.348	1.50395	0.343433	4.37917	1.19e-05	0.00017909
Nqo2	86.8418	1.50337	0.525881	2.85876	0.00425295	0.0272563
Tfcp2l1	1.76208	1.50215	1.00623	1.49284	0.135478	0
AI429214	8.67457	1.50088	0.97905	1.533	0.125277	0.317499
Gsr	157.13	1.50029	0.806754	1.85966	0.0629342	0.203098
Slc17a6	8.37107	1.4996	0.983224	1.52518	0.127213	0.320811
Rnf41	40.3558	1.49909	0.587574	2.55132	0.0107316	0.0560036
Cldn12	259.411	1.49855	0.362174	4.13764	3.51e-05	0.000466541
Nipal4	13.538	1.49839	0.946717	1.58272	0.113485	0.298375
Gm6789	16.5695	1.49766	0.730644	2.04978	0.0403862	0.151217
Gm42114	3.33192	1.49719	1.04713	1.4298	0.152773	0.357706
Ier5	696.414	1.49522	0.301272	4.963	6.94e-07	1.38e-05
Plxnb1	115.415	1.49258	0.38417	3.8852	0.000102246	0.00117349
Gpt2	43.6917	1.49102	0.724585	2.05776	0.0396134	0.149149
Npas2	9.45299	1.48983	0.975254	1.52764	0.126603	0.319666
LOC115487945	11.75	1.48962	0.875056	1.70231	0.0886973	0.253252
Apobec1	82.1375	1.48961	0.463762	3.21202	0.00131803	0.0104928
Slc7a3	3.70564	1.4896	1.03535	1.43874	0.150223	0.354241
Thap6	17.0785	1.48956	0.827479	1.80012	0.0718415	0.220722
Adamts3	1.75066	1.48918	1.00483	1.48203	0.138333	0
Ef02	3.14926	1.48908	1.04714	1.42204	0.155013	0.361026
Trip10	108.162	1.4878	0.603219	2.46644	0.0136464	0.0671538
Smim10l2a	1.80195	1.4878	1.00438	1.48131	0.138524	0
Gm41402	2.20941	1.4875	1.00233	1.48404	0.137799	0.33661
Tmsb15b1	2.20941	1.4875	1.00233	1.48404	0.137799	0.33661
Nhsl1	43.8192	1.48745	0.593496	2.50626	0.0122016	0.0615519
Ccdc12	141.119	1.48706	0.338501	4.39306	1.12e-05	0.000169621
Gabrr1	1.75635	1.48685	1.00453	1.48015	0.138834	0
Upk2	1.75635	1.48685	1.00453	1.48015	0.138834	0
Ghr	107.043	1.48622	0.377067	3.94152	8.1e-05	0.000968191
Gm12222	1.74497	1.48599	1.00449	1.47934	0.139049	0
Slc25a10	155.428	1.48581	0.371925	3.99493	6.47e-05	0.000795878
Bcl2	140.917	1.48451	0.365243	4.06443	4.81e-05	0.000615508
Gm2076	6.50546	1.48437	0.984927	1.50709	0.131788	0.327769
Galk1	2.16801	1.484	1.00204	1.48098	0.138612	0.337331
Rasl12	2.49006	1.4837	1.04199	1.42391	0.154472	0.360316
Serpine2	665.964	1.4833	0.361967	4.09788	4.17e-05	0.000543221
Plcg2	70.6653	1.48266	0.472282	3.13934	0.00169326	0.0129662
Fbxl14	90.3073	1.48177	0.572627	2.58767	0.00966275	0.051745
Ccdc9	78.6754	1.48062	0.530147	2.79284	0.00522478	0.03199
Gramd1c	7.87138	1.47949	0.961684	1.53844	0.123941	0.315799
Slc25a25	25.663	1.47941	0.696407	2.12435	0.0336413	0.132066
Edem2	118.993	1.47905	0.381363	3.87833	0.000105175	0.00120419
Smcr8	49.7222	1.47879	0.665732	2.2213	0.0263308	0.110709
Rab20	45.8297	1.47831	0.557409	2.65211	0.00799911	0.0445415
Trpm4	33.9947	1.47755	0.680476	2.17134	0.0299053	0.121409
Fat2	4.98782	1.47738	1.03773	1.42367	0.154543	0.360364
Adcy7	10.4483	1.47734	0.964482	1.53175	0.125584	0.317865
Smpd5	2.18666	1.4773	1.00125	1.47545	0.140092	0.33995
Ddx3y	97.1693	1.47646	0.514688	2.86865	0.00412229	0.0266826
Manba	15.7466	1.47571	0.90301	1.63421	0.102214	0.278071
Cflar	182.973	1.47448	0.371357	3.97051	7.17e-05	0.000872899
Gfus	256.075	1.47419	0.342766	4.30087	1.7e-05	0.000245657
3010003L21Rik	9.4658	1.47322	0.981214	1.50142	0.133246	0.3299
Tek	2.16386	1.47229	1.00076	1.47117	0.141246	0.34147
Chst13	2.16386	1.47229	1.00076	1.47117	0.141246	0.34147
Cdkn2aipnl	327.411	1.47149	0.310926	4.73259	2.22e-06	3.92e-05
Sema4d	41.2499	1.46949	0.573946	2.56033	0.0104572	0.0549412
Gm6758	2.74435	1.46891	1.03835	1.41467	0.157166	0.364163
Frmd4a	49.9798	1.4676	0.561532	2.61356	0.00896044	0.0488289
Ifrd1	760.861	1.46719	0.264604	5.54484	2.94e-08	7.58e-07
Gpr135	2.3996	1.46632	1.04199	1.40724	0.159357	0.36772
Serpini1	2.14106	1.46429	0.999916	1.46442	0.14308	0.344096
Rtkn	227.845	1.46423	0.333149	4.39511	1.11e-05	0.000168211
Adgrb1	2.20214	1.46392	0.999578	1.46454	0.143047	0.344096
Carmil1	17.9584	1.46386	0.751189	1.94872	0.0513286	0.178121
Ppp1r3b	9.0751	1.46352	0.929501	1.57452	0.115366	0.301598
Rnf217	84.6753	1.46223	0.560418	2.60918	0.00907602	0.0493251
Kras	127.153	1.46177	0.469177	3.11561	0.00183565	0.0138192
Tmem229b-ps	8.20356	1.46112	0.96703	1.51093	0.130806	0.326213
Oxsm	19.0379	1.4611	0.709883	2.05823	0.0395681	0.149096
AA467197	1.7336	1.46109	1.00164	1.45869	0.14465	0
Hpn	1.7336	1.46109	1.00164	1.45869	0.14465	0
4732419C18Rik	3.87819	1.46058	1.0408	1.40332	0.160521	0.369771
0dk	405.208	1.46053	0.307216	4.75409	1.99e-06	3.6e-05
Anxa1	2164.53	1.46009	0.378639	3.85615	0.000115185	0.00130105
Steap1	164.668	1.45931	0.399781	3.65027	0.000261969	0.00266565
Zfp397	9.19389	1.45895	0.974505	1.49712	0.134363	0.332147
H2ac22	2.28779	1.45759	1.04291	1.39762	0.162229	0.372202
Pip5k1b	2.15095	1.45734	0.998997	1.4588	0.144619	0.346687
Tmed10	664.615	1.45712	0.314849	4.62798	3.69e-06	6.2e-05
Scin	2.33955	1.4567	1.04102	1.39929	0.161725	0.37144
Rhou	105.088	1.45658	0.420401	3.46473	0.000530761	0.00490086
Trmo	9.80539	1.45584	0.923142	1.57705	0.114783	0.300513
Septin9	67.331	1.45573	0.502186	2.89878	0.00374619	0.0247651
Sigirr	44.8545	1.45513	1.04673	1.39016	0.164479	0.375974
Acod1	2.17948	1.45393	0.998479	1.45614	0.145354	0.347456
Ier2	58.521	1.45391	0.552073	2.63355	0.00844971	0.0464522
Gfra4	2.11826	1.45378	0.998758	1.45559	0.145505	0.347469
Tnni3	2.11826	1.45378	0.998758	1.45559	0.145505	0.347469
Zfp422	1.73355	1.45124	1.00045	1.45058	0.146897	0
Ces1h	1.73355	1.45124	1.00045	1.45058	0.146897	0
1700012B09Rik	1.76773	1.4491	1	1.4491	0.147311	0
Vrk1	187.466	1.4489	0.375471	3.85889	0.000113905	0.00129068
Jpt2	227.224	1.44842	0.301718	4.80058	1.58e-06	2.92e-05
Bfsp1	4.64681	1.44768	1.03265	1.4019	0.160945	0.370449
Gm51873	1.73924	1.44731	0.999942	1.4474	0.147785	0
Gm36377	3.12217	1.44709	1.04735	1.38168	0.167071	0.380012
Gm40855	2.93855	1.44703	1.04675	1.3824	0.166847	0.379685
Fcor	2.23063	1.4436	0.997041	1.44789	0.147649	0.350125
Dagla	25.5606	1.44264	0.769956	1.87366	0.0609774	0.199291
P4ha2	113.59	1.44134	0.505914	2.84898	0.00438597	0.027871
Gm31228	2.09546	1.44084	0.997283	1.44476	0.148525	0.351619
Ptgs2	266.897	1.44075	0.460068	3.1316	0.00173857	0.0132279
Gm8349	16.6632	1.43974	0.844748	1.70435	0.0883163	0.252337
Pdk3	228.612	1.43961	0.416262	3.45841	0.000543371	0.00499789
Tmem205	62.4842	1.4376	0.562619	2.55519	0.0106131	0.0555546
Spdl1	47.3988	1.43734	0.584949	2.45721	0.014002	0.0683384
2610203C22Rik	1.74493	1.43694	0.998632	1.4389	0.150178	0
Chdh	1.74493	1.43694	0.998632	1.4389	0.150178	0
Sprr2j-ps	1.71649	1.43486	0.998537	1.43696	0.150729	0
Capn5	49.1099	1.43455	0.604767	2.37206	0.017689	0.082039
Igf2	3.77233	1.43264	1.04375	1.37259	0.16988	0.384013
Alkbh2	56.8595	1.43259	0.498451	2.87408	0.00405207	0.0263117
Frrs1	634.607	1.43252	0.247313	5.79233	6.94e-09	1.96e-07
Zbed3	42.4562	1.43231	0.626769	2.28523	0.0222996	0.0977345
Frmd8	344.936	1.43157	0.319757	4.47704	7.57e-06	0.000120238
Snora16a	3.1567	1.43081	1.04735	1.36613	0.171898	0.387103
Gm5784	4.30701	1.43075	1.02477	1.39617	0.162663	0.372899
Fam160a1	17.1287	1.43021	0.709753	2.01508	0.0438963	0.160037
Tedc1	113.455	1.42999	0.437689	3.26714	0.00108641	0.00892269
Kif18b	17.663	1.42999	0.828401	1.7262	0.0843112	0.245066
Mdfi	15.2906	1.42973	0.819725	1.74416	0.0811312	0.238976
Chac2	15.8078	1.42962	0.848972	1.68395	0.092192	0.260003
Epha1	1.72791	1.42775	0.997583	1.43121	0.152369	0
Sipa1l1	95.3769	1.42579	0.616499	2.31272	0.0207378	0.0924227
Setmar	17.4466	1.42571	0.827696	1.7225	0.0849788	0.246154
Ltb4r1	18.6913	1.42506	0.882566	1.61468	0.10638	0.285858
Gm38500	9.33741	1.42323	0.946412	1.50381	0.132629	0.329059
H2ac8	10.7521	1.42096	0.903814	1.57218	0.115908	0.302515
Gapdh	53.0919	1.41934	0.546597	2.59669	0.0094128	0.0507303
Gm51955	1.67237	1.41818	0.996797	1.42274	0.154812	0
Pgk1-rs7	62.3039	1.41756	0.528256	2.68347	0.00728617	0.041297
Arl4c	857.133	1.41635	0.270919	5.22795	1.71e-07	3.86e-06
Wdr54	30.9206	1.41543	0.607625	2.32944	0.0198359	0.0894937
Jade2	122.112	1.4154	0.413089	3.42637	0.000611708	0.00547124
Spcs2	422.242	1.41457	0.280232	5.04786	4.47e-07	9.21e-06
Ppef2	6.79166	1.41307	0.962233	1.46853	0.14196	0.342484
H2-T23	2.15668	1.41209	0.993397	1.42147	0.155179	0.361252
Megf11	7.48589	1.41008	0.956823	1.47371	0.140561	0.34061
Scd1	217.234	1.41005	0.469423	3.00379	0.00266638	0.0188493
Tcf24	2.08963	1.4092	0.993341	1.41864	0.156003	0.362351
Lrrc1	60.8763	1.40917	0.975117	1.44513	0.148422	0.351433
Eml2	224.449	1.40853	0.374561	3.76049	0.000169583	0.00183001
Aif1l	192.895	1.40711	0.373035	3.77206	0.000161908	0.00175515
Pimreg	209.381	1.40672	0.483515	2.90936	0.00362173	0.0241099
Fjx1	22.9087	1.40616	0.701228	2.00528	0.0449336	0.162661
Liph	2.04986	1.40588	0.993079	1.41567	0.156871	0
Socs5	106.552	1.40577	0.458772	3.06421	0.00218245	0.0159994
Rreb1	47.9608	1.40557	0.628853	2.23514	0.0254081	0.107782
Tceal3	2.01559	1.40555	0.993181	1.4152	0.15701	0
Gm38476	1.67806	1.40521	0.995085	1.41215	0.157907	0
Slc31a2	92.2076	1.40512	0.450667	3.11786	0.00182168	0.0137285
Bcat1	10.6628	1.40436	0.964086	1.45668	0.145205	0.347217
Clip3	6.75732	1.40408	1.00752	1.3936	0.163438	0.374088
Pnpla6	106.812	1.40397	0.406445	3.45426	0.000551813	0.00505274
Adat2	46.1024	1.40333	0.513462	2.73308	0.00627456	0.0368214
Padi4	1.60966	1.40209	0.995099	1.40899	0.158837	0
Frk	85.3601	1.40115	0.416414	3.3648	0.000765995	0.00661882
Rtp4	27.5518	1.40105	0.651816	2.14945	0.0315987	0.1262
Col2a1	12.4502	1.40104	0.901738	1.55371	0.120253	0.30983
St8sia4	2.03834	1.40055	0.992435	1.41122	0.158179	0
Zkscan7	5.63323	1.39962	1.00074	1.39858	0.161938	0.371663
Gm4651	1.68949	1.39956	0.994277	1.40761	0.159246	0
Serpinb5	314.727	1.39938	0.300913	4.65046	3.31e-06	5.62e-05
Fadd	46.7528	1.3993	0.58859	2.37738	0.017436	0.0812117
Snx18	303.914	1.39896	0.338946	4.12737	3.67e-05	0.000485592
Tlr5	1.66669	1.39889	0.994325	1.40687	0.159466	0
Plat	18.0538	1.39813	0.874468	1.59883	0.109859	0.291743
Plppr4	4.06653	1.39768	1.02598	1.36228	0.173108	0.388677
Gm8518	148.116	1.39603	0.406879	3.43108	0.000601192	0.00539749
Muc13	2.06841	1.39467	0.9916	1.40648	0.159582	0.368024
Gm11769	2.93019	1.39122	1.04732	1.32837	0.184057	0.403341
Fkbp10	2.91882	1.3908	1.0473	1.32798	0.184186	0.403562
Gm34170	1.99997	1.39037	0.991325	1.40254	0.160755	0
Klf15	1.99997	1.39037	0.991325	1.40254	0.160755	0
Tpi1	1716.84	1.38962	0.298401	4.65688	3.21e-06	5.46e-05
2310003N18Rik	2.04403	1.38846	0.990825	1.40132	0.161118	0
Rap1gap2	41.8086	1.38795	0.597032	2.32476	0.020085	0.0903318
Reep6	15.0175	1.38762	0.773629	1.79365	0.0728697	0.222795
Lilrb4a	1.70511	1.38682	0.992397	1.39745	0.162279	0
Slc38a4	1.59255	1.38613	0.993086	1.39578	0.16278	0
Zfp711	1.59255	1.38613	0.993086	1.39578	0.16278	0
Tceal9	2905.83	1.38473	0.246505	5.61745	1.94e-08	5.11e-07
G015	61.3093	1.38451	0.476084	2.90812	0.00363613	0.024172
Acsl3	305.609	1.38398	0.287762	4.80947	1.51e-06	2.81e-05
Ralgds	113.116	1.38373	0.370986	3.72988	0.000191568	0.00203948
Spred1	242.817	1.38296	0.303208	4.56109	5.09e-06	8.33e-05
Stard3nl	60.1808	1.38204	0.507134	2.7252	0.0064263	0.0373902
n-TRtcg3	1.99853	1.38186	0.990138	1.39562	0.162829	0
Hus1	40.1607	1.38122	0.714032	1.93439	0.0530652	0.18185
Cdkn2b	2.18713	1.38108	1.03799	1.33054	0.18334	0.402327
3110053B16Rik	9.23081	1.38026	0.930996	1.48256	0.138191	0.337055
Trnp1	24.2835	1.37911	0.655824	2.10287	0.035477	0.137497
Rpl10-ps1	8.7512	1.37885	0.984434	1.40065	0.161318	0.370889
Zbtb2	25.1001	1.37859	0.797707	1.72819	0.0839548	0.244329
Rab11fip4	3.61418	1.37856	1.04489	1.31933	0.187059	0.406769
Tspan14	243.556	1.37847	0.321991	4.28108	1.86e-05	0.000265593
Pdcl3	114.935	1.37773	0.512624	2.6876	0.00719675	0.0409173
Gap43	15.3633	1.37722	0.862104	1.59751	0.110153	0.292307
Rps6ka1	116.038	1.37641	0.37767	3.64447	0.000267942	0.00272005
Rnf113a1	19.6726	1.37634	0.814003	1.69083	0.0908687	0.257618
Gpr153	2.59114	1.37541	0.987118	1.39336	0.163512	0.374088
Vrk3	76.9455	1.37464	0.449628	3.05728	0.00223358	0.0162905
Proca1	1.96584	1.37401	0.989285	1.38889	0.164866	0
Tcf7	36.4433	1.37385	0.749883	1.83208	0.0669388	0.211318
Gls2	9.14254	1.37368	0.92517	1.48479	0.1376	0.336405
Rhbg	2.07252	1.37142	0.988425	1.38748	0.165295	0.377295
Ifi204	35.2365	1.37133	0.58407	2.34788	0.0188807	0.0861098
Gm15473	2.07984	1.37032	0.988302	1.38654	0.165581	0.377767
Trp53	78.9489	1.37018	0.594257	2.30571	0.021127	0.0937317
Pdk1	170.244	1.3701	0.408772	3.35174	0.000803046	0.00690968
Rnf38	77.4993	1.36951	0.512825	2.67053	0.00757325	0.0425522
Piwil4	1.96574	1.3687	0.988562	1.38454	0.166193	0
Gm16576	1.96574	1.3687	0.988562	1.38454	0.166193	0
Timm8a1	18.5736	1.36837	0.82158	1.66554	0.0958061	0.266167
Trpv4	180.875	1.36831	0.339328	4.0324	5.52e-05	0.000693987
Gjb5	27.5151	1.3682	0.605554	2.25942	0.0238571	0.102823
Ypel1	10.3369	1.36761	0.936692	1.46004	0.14428	0.346106
Gm6644	223.178	1.36731	0.456081	2.99794	0.00271809	0.0191044
Gm4262	3.61899	1.3652	1.04358	1.30819	0.19081	0.411907
Cstf2	51.2499	1.36498	0.490518	2.78273	0.0053903	0.0326392
Cox16	1.99284	1.36481	0.987852	1.38159	0.167097	0
Il1rap	29.349	1.36407	0.66868	2.03995	0.0413557	0.153202
Asl	24.3235	1.36331	0.70187	1.9424	0.0520889	0.179753
Msmo1	586.01	1.36316	0.335592	4.06196	4.87e-05	0.000620945
Gm15454	5.55209	1.36295	1.01544	1.34222	0.179524	0.397007
Stxbp3	47.8077	1.3624	0.541365	2.51661	0.0118491	0.0601561
Plekha2	237.467	1.36232	0.343709	3.96359	7.38e-05	0.00089184
Duoxa2	1.59829	1.36042	0.989523	1.37483	0.169185	0
Mrgpre	20.8869	1.35913	0.810453	1.677	0.0935427	0.26212
Rer1	399.856	1.35773	0.280883	4.83378	1.34e-06	2.52e-05
Yrdc	99.5621	1.35734	0.499775	2.7159	0.00660968	0.0383308
Mob3b	25.6239	1.35732	0.659953	2.05669	0.0397156	0.149455
Zfp146	85.1486	1.35657	0.566726	2.39369	0.0166797	0.0784025
Pih1d2	13.4653	1.35592	0.854013	1.58771	0.112352	0.296379
Gm6749	16.9561	1.35586	0.830324	1.63293	0.102484	0.278429
Gm32143	1.60962	1.35545	0.988753	1.37087	0.170416	0
Tex10	12.5703	1.35461	0.887322	1.52662	0.126855	0.320077
Ube2j2	365.202	1.35451	0.288553	4.69413	2.68e-06	4.61e-05
Slc25a17	152.678	1.3541	0.378785	3.57486	0.000350411	0.00342395
Zfp473	4.95869	1.35265	1.03163	1.31118	0.189798	0.410252
Dnhd1	4.34612	1.35256	1.03726	1.30398	0.19224	0.413849
Bloc1s2	102.626	1.35116	0.374473	3.60817	0.000308364	0.00305919
Klhdc7a	1.58113	1.35063	0.988249	1.36669	0.171724	0
Pde9a	1.58113	1.35063	0.988249	1.36669	0.171724	0
Rpl17-ps3	57.1827	1.35041	0.680931	1.98318	0.047347	0.168274
Igfbp3	578.334	1.34974	0.704507	1.91587	0.0553821	0.186428
1700017B05Rik	118.105	1.34937	0.398792	3.38364	0.000715309	0.00624899
Gmeb2	42.3982	1.34903	0.549985	2.45285	0.014173	0.068984
Ociad2	805.436	1.34784	0.269514	5.001	5.7e-07	1.15e-05
Gm12854	8.97383	1.34692	0.914707	1.47252	0.140881	0.34105
Gc	1.92024	1.34675	0.985715	1.36626	0.171856	0
Mast4	305.808	1.34583	0.303083	4.44046	8.98e-06	0.000139802
Rhobtb2	88.3432	1.34548	0.414886	3.24301	0.00118274	0.0095869
Gm6498	3.87788	1.34538	1.02522	1.31228	0.189426	0.409696
2500002B13Rik	22.2173	1.34485	0.799193	1.68276	0.092422	0.260399
Slc5a1	6.87764	1.34447	1.00388	1.33928	0.180481	0.398074
Ldha	3385.96	1.34438	0.279985	4.80161	1.57e-06	2.91e-05
Sptbn2	15.0928	1.34433	0.903153	1.48848	0.136623	0.33541
Rpl31-ps12	2.44208	1.34377	1.03065	1.30381	0.192299	0.413877
Irak3	5.07339	1.34296	1.03043	1.30331	0.19247	0.414019
Mamdc2	2.10044	1.34293	1.038	1.29377	0.195744	0.418475
Sft2d2	369.821	1.3428	0.331935	4.04538	5.22e-05	0.000660668
Chchd7	98.6036	1.34232	0.384898	3.48747	0.000487611	0.00455551
Pcid2	37.2345	1.34168	0.554653	2.41895	0.0155656	0.0743167
Flvcr2	2.82162	1.34156	1.04694	1.28141	0.200051	0.423872
Krt79	1.56407	1.34119	0.987011	1.35885	0.174196	0
Slc43a3	2.00426	1.34103	0.984482	1.36216	0.173146	0
Smcp	2.00426	1.34103	0.984482	1.36216	0.173146	0
Mob1b	18.9156	1.34095	0.707476	1.8954	0.058039	0.192599
Daam1	117.599	1.34036	0.39751	3.37189	0.000746552	0.00646257
Fhod3	8.76144	1.34005	0.952653	1.40665	0.15953	0.367964
Ubtd1	58.0428	1.33979	0.49737	2.69374	0.00706546	0.0403345
Gm34036	2.10609	1.33926	1.03761	1.29072	0.196801	0.420042
Pkn3	14.8345	1.33838	0.882395	1.51676	0.129327	0.323537
Gm26448	4.25646	1.33767	1.03666	1.29037	0.196924	0.420122
Gm14328	21.9636	1.33663	0.742133	1.80107	0.0716922	0.220722
Idh1	473.099	1.33617	0.321328	4.15828	3.21e-05	0.000431545
Tmem63b	317.03	1.33406	0.324075	4.1165	3.85e-05	0.000505308
Exd1	2.45079	1.33258	1.03101	1.29251	0.196181	0.419
Prob1	17.7764	1.33247	0.84842	1.57053	0.116292	0.303185
Plekho1	34.1874	1.33216	0.636261	2.09373	0.0362838	0.139691
Fpgs	17.3525	1.33206	0.867652	1.53525	0.124722	0.316631
Gm14023	7.21702	1.33144	0.964349	1.38067	0.167382	0.380295
Bcam	125.153	1.3299	0.565527	2.35162	0.0186918	0.0854946
Tnfaip8	142.003	1.32971	0.369205	3.60155	0.000316326	0.00313165
E2f8	55.5275	1.32868	0.514502	2.58245	0.00981021	0.0522601
H2bc14	1.89744	1.32829	0.983174	1.35102	0.176689	0
Tmem183a	358.725	1.32777	0.283077	4.69049	2.73e-06	4.68e-05
Gm12070	19.8299	1.32768	0.843755	1.57354	0.115594	0.30195
Gm20684	14.8345	1.32736	0.942481	1.40836	0.159023	0.367211
Rasa3	232.471	1.32629	0.306547	4.32655	1.51e-05	0.0002223
H2-K1	18.6826	1.32475	0.714102	1.85513	0.0635777	0.204505
Phlpp1	73.6757	1.32353	0.424454	3.1182	0.00181961	0.0137274
C1s1	132.593	1.3213	0.401957	3.28717	0.00101199	0.00841321
Pyroxd1	2.46651	1.32125	1.02941	1.2835	0.199315	0.422878
Gtdc1	13.9644	1.3204	0.768109	1.71903	0.0856092	0.247224
Mrps6	572.727	1.31974	0.257521	5.12478	2.98e-07	6.35e-06
Aqp1	89.5296	1.31899	0.479044	2.75338	0.00589831	0.0350898
Ly6i	2.87851	1.31745	1.04598	1.25954	0.207835	0.433919
Pla2g4a	80.4775	1.31744	0.542102	2.43024	0.0150887	0.0725252
Faap20	119.086	1.31743	0.440257	2.99241	0.00276785	0.0193844
Gfra2	45.5385	1.31613	0.593674	2.21692	0.0266284	0.111391
Tubg2	8.4832	1.3161	0.950763	1.38426	0.16628	0.378816
Gm16391	7.19524	1.3159	0.964856	1.36383	0.172622	0.388162
Gon7	19.0006	1.31475	0.736412	1.78535	0.074205	0.225861
Icam1	76.8761	1.31375	0.511357	2.56915	0.010195	0.0538273
Gm6736	6.40964	1.31189	0.968651	1.35434	0.175627	0.392249
Zfp277	109.508	1.31162	0.398138	3.29438	0.000986391	0.00824845
Havcr2	5.65681	1.31108	1.02283	1.28182	0.199907	0.423693
Klk6	1.85897	1.31054	0.980803	1.33619	0.181487	0
Pomgnt2	24.7111	1.30992	0.770287	1.70057	0.0890245	0.253954
Nkpd1	1.88592	1.30971	0.980489	1.33578	0.181622	0
Prlr	1.88592	1.30971	0.980489	1.33578	0.181622	0
Gm33641	1.89319	1.30826	0.980303	1.33454	0.182026	0
Efcab11	28.809	1.30823	0.634375	2.06223	0.0391862	0.148048
Adam9	44.1042	1.30818	0.780103	1.67694	0.0935548	0.26212
Gm9791	41.684	1.30808	0.549799	2.37919	0.0173505	0.0809161
[truncated: 43,927 more rows]

## Sheet: Table S7
Table S7. List of upregulated gene signatures associated with prolong exposure to trametinib.
	Pathway	pval	padj	ES	NES	nMoreExtreme	size	leadingEdge
1	HALLMARK_EPITHELIAL_MESENCHYMAL_TRANSITION	0.00227273	0.0222603	-0.562896	-3.11077	0	78	c("Postn"	"Fbln5"	"Col3a1"	"Col1a1"	"Col6a3"	"Pdgfrb"	"Ptx3"	"Lox"	"Acta2"	"Col6a2"	"Col1a2"	"Abi3bp"	"Mfap5"	"Fmod"	"Col5a2"	"Tgm2"	"Col5a3"	"Mylk"	"Tgfbi"	"Col5a1"	"Serpine1"	"Thbs1"	"Fstl1"	"Myl9"	"Matn2"	"Dcn"	"Sntb1"	"Mest"	"Timp3"	"Col12a1"	"Itga5"	"Slit3"	"Col8a2"	"Fzd8"	"Serpinh1"	"Bgn"	"Itgb3"	"Col4a1"	"Col4a2"	"Fbn1"	"Igfbp4"	"Fas"
2	HALLMARK_ESTROGEN_RESPONSE_EARLY	0.0106952	0.0542873	0.363425	1.76802	5	51	c("Krt18"	"Cldn7"	"Sult2b1"	"Krt8"	"Rab17"	"Krt19"	"Areg"	"Opn3"	"P2ry2"	"Elf3"	"Lad1"	"Tjp3"	"Stc2"	"Esrp2"	"Tubb2b"	"Sec14l2"	"Slc9a3r1"	"Abhd2"	"Pmaip1"	"Car12"	"Syngr1"	"Thsd4"	"Clic3")
3	HALLMARK_INTERFERON_ALPHA_RESPONSE	0.00221729	0.0222603	-0.600995	-2.73793	0	37	c("Gbp3"	"Trim5"	"Ifit3"	"Irf7"	"Mx2"	"Gbp2"	"Sp110"	"Ifi44"	"Ifit2"	"Rtp4"	"Dhx58"	"Trim12c"	"Ddx60"	"Cxcl10"	"Herc6"	"Ube2l6"	"Parp12"	"Bst2"	"Stat2"	"Parp9"	"Lgals3bp"	"Ifih1"	"Samd9l"	"Irf9"	"Uba7"	"Il7"	"Ifi35"	"Txnip"	"Csf1")
4	HALLMARK_INTERFERON_GAMMA_RESPONSE	0.00228311	0.0222603	-0.400034	-2.03085	0	58	c("Gbp3"	"Ifit3"	"Sspn"	"Cfh"	"Irf7"	"Mx2"	"St3gal5"	"Sp110"	"Ifi44"	"Ifit2"	"Ifit1bl1"	"Stat1"	"Rtp4"	"Dhx58"	"Ddx60"	"Cxcl10"	"Herc6"	"Ube2l6"	"Parp12"	"Bst2"	"Gbp9"	"Stat2"	"Lgals3bp"	"Irf5"	"Ifih1"	"Tapbp"	"Fas"	"Samd9l"	"Irf9"	"Il7"	"Znfx1"	"Eif4e3"	"Ifi35"	"Txnip"	"Vamp5"	"Casp7")
5	HALLMARK_KRAS_SIGNALING_UP	0.00539568	0.0420863	0.370993	1.80125	2	52	c("F2rl1"	"Arg1"	"Flt4"	"Wnt7a"	"Itga2"	"Rbp4"	"Irf8"	"Galnt3"	"Mpzl2"	"Kcnn4"	"Rgs16"	"Tph1"	"Ppbp"	"Map7"	"Traf1"	"Aldh1a3"	"Ano1"	"Tmem176b"	"Satb1"	"Tnfaip3"	"Cidea"	"Gypc"	"Ppp1r15a"	"Prkg2"	"Etv1"	"Tmem176a"	"Slpi"	"Sox9")
6	HALLMARK_MYC_TARGETS_V1	0.00909091	0.0542873	0.442861	1.82251	4	28	c("Cstf2"	"Tardbp"	"Ifrd1"	"Odc1"	"Cct3"	"Tufm"	"Erh"	"Nop16"	"Pabpc4"	"Set"	"Etf1"	"Pole3"	"Eif2s1"	"Rps6"	"Ldha"	"Nme1"	"Rps3"	"Rps5"	"Hspd1"	"Psma6"	"Clns1a"	"Sf3a1"	"Fam120a"	"Cct4"	"Hnrnpc"	"Rpl18"	"Cox5a")
7	HALLMARK_MYOGENESIS	0.0111359	0.0542873	-0.348956	-1.71166	4	48	c("Col3a1"	"Col1a1"	"Col6a3"	"Sod3"	"Col6a2"	"Igf1"	"Sspn"	"Mylk"	"Nqo1"	"Col4a2"	"Fhl1"	"Pgam2"	"Denn2b"	"Aebp1"	"Speg"	"Sparc"	"Prnp"	"Cryab"	"Gsn"	"Ephb3"	"Cdh13"	"Igfbp7"	"Itgb5"	"Ncam1")
8	HALLMARK_UV_RESPONSE_DN	0.00223214	0.0222603	-0.443145	-2.16864	0	47	c("Fbln5"	"Col3a1"	"Col1a1"	"Pdgfrb"	"Atp2b4"	"Igfbp5"	"Col1a2"	"Dlc1"	"Col5a2"	"Serpine1"	"Kalrn"	"Itgb3"	"Mgll"	"Pias3"	"Arhgef9"	"Vldlr"	"Sdc2"	"Dab2"	"Ptprm"	"Pmp22"	"Cdon")
[truncated: 16 more columns]

## Sheet: Table S8
Table S8. oPOSSUM analysis of upregulated genes in 4NQOs-PE cells.
Analysis Results
Selected Parameters
Job ID:	mtebyfN5WF
Number of genes submitted for analysis:	759
Number of genes included in analysis:	563
Number of genes missing from analysis:	196
Number of unique oPOSSUM genes in analysis:	566
JASPAR collection(s):	CORE
Taxonomic supergroup(s):	vertebrates
Minimum profile specificity:	8 bits
Conservation cutoff:	0.4
Matrix score threshold:	0.85
Upstream sequence length:	5000
Downstream sequence length:	5000
Results returned:	All results sorted by Z-score
Target Genes
Analyzed:	1700001K19Rik 2810006K23Rik 5930403N24Rik 6430548M08Rik 6820431F20Rik 8430429K09Rik A730020E08Rik A930029G22Rik Abca8b Abcb10 Abcc5 Abi3bp Acta2 Actg2 Actr3b Adamts1 Adamts5 Adamtsl1 Adamtsl5 Adcy9 Add3 Adh7 Aff3 Agpat4 Ahi1 Ahr Akap13 Akap9 Aldh1a1 Aldh3a1 Alms1 Alms1-ps1 Amotl2 Ankrd11 Ankrd12 Ankrd26 Antxr1 Arhgap23 Arhgap29 Arhgef25 Arhgef9 Arid4b Arid5b Arl2bp Arl4a Armc9 Ash1l Atad5 Atf6 At…
Omitted:	G0q Gm39181 Gm45916 Gm30807 E0h Gm39549 1110058D11Rik Mir8111 Gm51670 Gm36183 Bpnt2 Gm52109 Gm3230 Gm5865 Gm13199 9530091C08Rik Gm9465 Gm41306 6530402F18Rik Gm52900 Gm16118 Gm46605 Gm5841 Tenm2 Fc0os Rpl39-ps Gm30531 E230029C05Rik Gm39109 Hmgb1-rs16 Gm40726 Gm46179 Gm30409 Gm17873 Gm34590 E130310I04Rik Gm52405 Gm52724 Gm39165 Olfr856-ps1 Zc2hc1a Gm35760 Gm30294 Gm3617 H3c2 Gm15774 Gm31812 Gm49221…
Results - click column headers to sort by that column
TF	JASPAR ID	Class	Family	Tax group	IC	GC Content	Target gene hits	Target gene non-hits	Background gene hits	Background gene non-hits	Target TFBS hits	Target TFBS nucleotide rate	Background TFBS hits	Background TFBS nucleotide rate	Z-score	Fisher score
Nkx2-5	MA0063.1	Helix-Turn-Helix	Homeo	vertebrates	8.27	0.218	524	42	22239	7108	8741	0.0403	194678	0.0352	33.898	56.877
HOXA5	MA0158.1	Helix-Turn-Helix	Homeo	vertebrates	8.759	0.315	529	37	22752	6595	8974	0.0473	205308	0.0424	29.489	54.832
Pdx1	MA0132.1	Helix-Turn-Helix	Homeo	vertebrates	9.04	0.194	495	71	20350	8997	6092	0.0241	133971	0.0208	28.46	53.192
ARID3A	MA0151.1	Helix-Turn-Helix	Arid	vertebrates	9.896	0.062	510	56	21239	8108	7084	0.028	157613	0.0244	28.308	55.965
FOXI1	MA0042.1	Winged Helix-Turn-Helix	Forkhead	vertebrates	13.183	0.263	448	118	15640	13707	2286	0.0181	49548	0.0154	27.015	83.414
TBP	MA0108.2	Beta-sheet	TATA-binding	vertebrates	10.086	0.377	402	164	13644	15703	1608	0.0159	34854	0.0135	25.301	71.311
Prrx2	MA0075.1	Helix-Turn-Helix	Homeo	vertebrates	9.063	0.027	482	84	19482	9865	5179	0.017	114042	0.0147	23.667	53.149
Nobox	MA0125.1	Helix-Turn-Helix	Homeo	vertebrates	9.573	0.26	445	121	17499	11848	3357	0.0177	75342	0.0156	20.961	48.005
SRY	MA0084.1	Other Alpha-Helix	High Mobility Group	vertebrates	9.193	0.238	496	70	19731	9616	4487	0.0266	103131	0.024	20.961	64.847
CEBPA	MA0102.2	Zipper-Type	Leucine Zipper	vertebrates	8.712	0.358	453	113	16235	13112	2430	0.0144	54037	0.0126	20.26	77.748
FOXA1	MA0148.1	Winged Helix-Turn-Helix	Forkhead	vertebrates	12.533	0.332	462	104	17712	11635	2945	0.0213	67191	0.0191	20.071	61.211
FOXO3	MA0157.1	Winged Helix-Turn-Helix	Forkhead	vertebrates	11.734	0.298	473	93	18045	11302	3265	0.0172	73570	0.0152	20.017	67.523
NFATC2	MA0152.1	Ig-fold	Rel	vertebrates	9.859	0.346	490	76	19488	9859	4381	0.0202	100015	0.0181	19.409	61.919
FOXD1	MA0031.1	Winged Helix-Turn-Helix	Forkhead	vertebrates	11.926	0.275	456	110	17271	12076	2895	0.0152	65304	0.0135	18.665	62.387
Foxa2	MA0047.2	Winged Helix-Turn-Helix	Forkhead	vertebrates	13.268	0.315	428	138	15320	14027	1988	0.0157	45128	0.014	17.966	67.335
Sox5	MA0087.1	Other Alpha-Helix	High Mobility Group	vertebrates	10.831	0.199	457	109	17363	11984	3141	0.0145	71585	0.0129	16.645	61.869
MEF2A	MA0052.1	Other Alpha-Helix	MADS	vertebrates	15.709	0.179	287	279	8119	21228	694	0.00457	14548	0.00376	16.303	68.39
Foxq1	MA0040.1	Winged Helix-Turn-Helix	Forkhead	vertebrates	14.07	0.202	323	243	9941	19406	955	0.00692	20792	0.00591	16.173	65.12
Gfi	MA0038.1	Zinc-coordinating	BetaBetaAlpha-zinc finger	vertebrates	9.47	0.391	472	94	17515	11832	2877	0.0189	66728	0.0172	16.079	76.016
Foxd3	MA0041.1	Winged Helix-Turn-Helix	Forkhead	vertebrates	12.945	0.223	406	160	14933	14414	2004	0.0158	46202	0.0143	15.616	52.853
IRF1	MA0050.1	Winged Helix-Turn-Helix	IRF	vertebrates	16.008	0.383	255	311	7387	21960	567	0.00448	11966	0.00371	15.583	54.132
SPIB	MA0081.1	Winged Helix-Turn-Helix	Ets	vertebrates	9.06	0.466	530	36	22304	7043	8035	0.037	191986	0.0347	15.502	64.329
Pax4	MA0068.1	Helix-Turn-Helix	Homeo	vertebrates	11.004	0.441	9	557	94	29253	9	0.000178	94	7.29e-05	15.097	8.796
NKX3-1	MA0124.1	Helix-Turn-Helix	Homeo	vertebrates	11.127	0.179	457	109	17365	11982	3047	0.014	70803	0.0128	13.537	61.835
Gata1	MA0035.2	Zinc-coordinating	GATA	vertebrates	10.878	0.373	485	81	18874	10473	3493	0.0253	83171	0.0236	13.429	66.772
MZF1_5-13	MA0057.1	Zinc-coordinating	BetaBetaAlpha-zinc finger	vertebrates	9.4	0.588	455	111	16790	12557	3361	0.0221	79768	0.0206	13.143	69.743
HLF	MA0043.1	Zipper-Type	Leucine Zipper	vertebrates	11.147	0.394	224	342	6453	22894	448	0.00354	9680	0.003	12.108	46.115
ELF5	MA0136.1	Winged Helix-Turn-Helix	Ets	vertebrates	8.693	0.429	516	50	21087	8260	5334	0.0316	128774	0.0299	11.984	66.445
Lhx3	MA0135.1	Helix-Turn-Helix	Homeo	vertebrates	16.354	0.131	227	339	6548	22799	503	0.00431	11115	0.00373	11.537	46.762
Sox17	MA0078.1	Other Alpha-Helix	High Mobility Group	vertebrates	10.502	0.384	481	85	18170	11177	3019	0.0179	72051	0.0168	10.868	74.734
HNF1A	MA0046.1	Helix-Turn-Helix	Homeo	vertebrates	15.548	0.259	126	440	3147	26200	190	0.00175	3982	0.00144	10.086	33.063
Hand1::Tcfe2a	MA0092.1	Zipper-Type	Helix-Loop-Helix	vertebrates	10.144	0.507	453	113	17241	12106	2627	0.0173	63131	0.0163	9.552	59.788
Pax6	MA0069.1	Helix-Turn-Helix	Homeo	vertebrates	13.798	0.432	65	501	1373	27974	77	0.00071	1490	0.000539	9.046	23.171
FOXF2	MA0030.1	Winged Helix-Turn-Helix	Forkhead	vertebrates	14.824	0.334	176	390	4683	24664	287	0.00265	6357	0.0023	8.883	41.816
INSM1	MA0155.1	Zinc-coordinating	BetaBetaAlpha-zinc finger	vertebrates	14.862	0.667	285	281	8401	20946	718	0.00567	16644	0.00516	8.792	60.597
HNF1B	MA0153.1	Helix-Turn-Helix	Homeo	vertebrates	16.821	0.222	177	389	4695	24652	303	0.00239	6680	0.00207	8.733	42.413
CTCF	MA0139.1	Zinc-coordinating	BetaBetaAlpha-zinc finger	vertebrates	17.205	0.645	144	422	3384	25963	181	0.00226	3978	0.00195	8.674	43.518
SOX9	MA0077.1	Other Alpha-Helix	High Mobility Group	vertebrates	9.079	0.358	420	146	15311	14036	1893	0.0112	45231	0.0105	8.423	59.553
REL	MA0101.1	Ig-fold	Rel	vertebrates	10.515	0.559	374	192	12738	16609	1324	0.00872	31361	0.0081	8.423	60.618
NFIL3	MA0025.1	Zipper-Type	Leucine Zipper	vertebrates	14.139	0.265	257	309	8162	21185	642	0.00465	14833	0.00422	8.234	41.597
Sox2	MA0143.1	Other Alpha-Helix	High Mobility Group	vertebrates	12.951	0.361	113	453	3043	26304	171	0.00169	3782	0.00147	7.166	24.756
Nr2e3	MA0164.1	Zinc-coordinating	Hormone-nuclear Receptor	vertebrates	12.028	0.373	269	297	8246	21101	611	0.00282	14003	0.00253	6.93	49.653
PBX1	MA0070.1	Helix-Turn-Helix	Homeo	vertebrates	14.641	0.31	180	386	4769	24578	289	0.00228	6589	0.00204	6.544	43.394
FEV	MA0156.1	Winged Helix-Turn-Helix	Ets	vertebrates	12.121	0.442	491	75	19307	10040	3607	0.019	88519	0.0183	6.425	66.27
MZF1_1-4	MA0056.1	Zinc-coordinating	BetaBetaAlpha-zinc finger	vertebrates	8.586	0.725	522	44	21104	8243	8210	0.0324	203907	0.0316	5.754	74.782
TEAD1	MA0090.1	Helix-Turn-Helix	Homeo	vertebrates	15.678	0.507	225	341	6218	23129	388	0.00307	9111	0.00283	5.57	51.726
Myb	MA0100.1	Helix-Turn-Helix	Myb	vertebrates	9.883	0.591	462	104	16841	12506	2666	0.014	65484	0.0135	5.379	76.783
SPI1	MA0080.2	Winged Helix-Turn-Helix	Ets	vertebrates	9.64	0.435	495	71	20099	9248	4351	0.0201	107711	0.0195	5.071	57.333
Nkx3-2	MA0122.1	Helix-Turn-Helix	Homeo	vertebrates	8.542	0.463	503	63	19935	9412	4247	0.0252	105475	0.0245	5.059	70.032
HIF1A::ARNT	MA0259.1	Zipper-Type	Helix-Loop-Helix	vertebrates	9.74	0.657	399	167	12973	16374	1688	0.00889	41306	0.00854	4.707	81.206
Pou5f1	MA0142.1	Helix-Turn-Helix	Homeo	vertebrates	14.808	0.308	133	433	3558	25789	200	0.00198	4696	0.00182	4.47	29.975
AP1	MA0099.2	Zipper-Type	Leucine Zipper	vertebrates	9.193	0.405	511	55	21078	8269	5163	0.0238	128539	0.0233	4.444	59.978
STAT1	MA0137.2	Ig-fold	Stat	vertebrates	13.119	0.452	253	313	7525	21822	465	0.00459	11389	0.00441	3.298	49.73
RORA_2	MA0072.1	Zinc-coordinating	Hormone-nuclear Receptor	vertebrates	17.425	0.369	153	413	4167	25180	222	0.00205	5344	0.00193	3.16	33.558
T	MA0009.1	Beta-Hairpin-Ribbon	T	vertebrates	17.863	0.452	84	482	2183	27164	108	0.000782	2512	0.000714	3.128	19.858
Stat3	MA0144.1	Ig-fold	Stat	vertebrates	13.601	0.505	360	206	12028	17319	1046	0.00689	25869	0.00668	3.049	60.354
IRF2	MA0051.1	Winged Helix-Turn-Helix	IRF	vertebrates	21.134	0.412	37	529	884	28463	40	0.000474	913	0.000425	2.933	10.98
NR3C1	MA0113.1	Zinc-coordinating	Hormone-nuclear Receptor	vertebrates	14.749	0.432	100	466	2785	26562	138	0.00164	3317	0.00154	2.896	20.064
NR2F1	MA0017.1	Zinc-coordinating	Hormone-nuclear Receptor	vertebrates	15.924	0.478	163	403	4605	24742	245	0.00226	5950	0.00215	2.802	32.863
Ar	MA0007.1	Zinc-coordinating	Hormone-nuclear Receptor	vertebrates	15.703	0.498	26	540	610	28737	28	0.000406	640	0.000364	2.675	8.375
RUNX1	MA0002.2	Ig-fold	Runt	vertebrates	10.401	0.502	458	108	17972	11375	2827	0.0205	71021	0.0202	2.504	52.895
SRF	MA0083.1	Other Alpha-Helix	MADS	vertebrates	17.965	0.466	44	522	1007	28340	47	0.000371	1077	0.000334	2.498	13.895
SP1	MA0079.2	Zinc-coordinating	BetaBetaAlpha-zinc finger	vertebrates	11.129	0.82	436	130	14691	14656	2885	0.019	72451	0.0187	2.474	88.247
E2F1	MA0024.1	Winged Helix-Turn-Helix	E2F	vertebrates	13.838	0.625	288	278	9114	20233	735	0.00387	18153	0.00375	2.384	49.767
Tal1::Gata1	MA0140.1	Zipper-Type	Helix-Loop-Helix	vertebrates	11.297	0.451	246	320	7727	21620	486	0.00576	12131	0.00564	1.919	40.541
HNF4A	MA0114.1	Zinc-coordinating	Hormone-nuclear Receptor	vertebrates	9.617	0.522	253	313	8008	21339	522	0.00447	13045	0.00438	1.591	41.132
Evi1	MA0029.1	Zinc-coordinating	BetaBetaAlpha-zinc finger	vertebrates	17.909	0.28	76	490	2118	27229	99	0.000913	2424	0.000877	1.468	15.257
Arnt::Ahr	MA0006.1	Zipper-Type	Helix-Loop-Helix	vertebrates	9.532	0.715	470	96	17696	11651	3233	0.0128	81522	0.0126	1.45	70.328
Zfp423	MA0116.1	Zinc-coordinating	BetaBetaAlpha-zinc finger	vertebrates	17.925	0.679	231	335	6590	22757	432	0.00427	10815	0.00419	1.411	49.308
RELA	MA0107.1	Ig-fold	Rel	vertebrates	14.757	0.567	264	302	8275	21072	562	0.0037	14103	0.00364	1.134	45.096
CREB1	MA0018.2	Zipper-Type	Leucine Zipper	vertebrates	10.139	0.523	341	225	11339	18008	893	0.0047	22464	0.00464	1.074	55.584
Arnt	MA0004.1	Zipper-Type	Helix-Loop-Helix	vertebrates	10.992	0.642	285	281	8189	21158	607	0.0024	15277	0.00237	0.732	64.97
Ddit3::Cebpa	MA0019.1	Zipper-Type	Leucine Zipper	vertebrates	11.652	0.483	218	348	6699	22648	402	0.00318	10168	0.00315	0.499	36.931
USF1	MA0093.1	Zipper-Type	Helix-Loop-Helix	vertebrates	11.29	0.643	339	227	11579	17768	999	0.0046	25359	0.00459	0.304	49.871
NFKB1	MA0105.1	Ig-fold	Rel	vertebrates	15.627	0.758	132	434	3965	25382	224	0.00162	5686	0.00162	0.175	21.875
PPARG::RXRA	MA0065.2	Zinc-coordinating	Hormone-nuclear Receptor	vertebrates	11.663	0.547	230	336	7283	22064	476	0.0047	12118	0.0047	0.062	36.044
NR1H2::RXRA	MA0115.1	Zinc-coordinating	Hormone-nuclear Receptor	vertebrates	27.878	0.445	5	561	126	29221	5	5.6e-05	128	5.62e-05	-0.098	2.267
TAL1::TCF3	MA0091.1	Zipper-Type	Helix-Loop-Helix	vertebrates	14.07	0.453	277	289	8794	20553	583	0.00461	14878	0.00461	-0.142	46.443
NF-kappaB	MA0061.1	Ig-fold	Rel	vertebrates	13.345	0.621	297	269	9732	19615	763	0.00502	19554	0.00505	-0.518	46.464
EBF1	MA0154.1	Zipper-Type	Helix-Loop-Helix	vertebrates	11.564	0.648	389	177	14024	15323	1666	0.011	42665	0.011	-0.669	52.47
PPARG	MA0066.1	Zinc-coordinating	Hormone-nuclear Receptor	vertebrates	20.365	0.523	3	563	84	29263	3	3.95e-05	84	4.34e-05	-0.793	1.48
Spz1	MA0111.1	Other	Other	vertebrates	11.907	0.538	273	293	8422	20925	562	0.00407	14553	0.00414	-1.284	49.762
TLX1::NFIC	MA0119.1	Helix-Turn-Helix::Other	Homeo::Nuclear Factor I-CCAAT-binding	vertebrates	19.665	0.598	43	523	1157	28190	46	0.000424	1245	0.00045	-1.553	9.827
Tcfcp2l1	MA0145.1	Other	CP2	vertebrates	11.65	0.609	377	189	13055	16292	1376	0.0127	35456	0.0128	-1.579	57.867
Egr1	MA0162.1	Zinc-coordinating	BetaBetaAlpha-zinc finger	vertebrates	14.456	0.739	231	335	6787	22560	450	0.00326	11738	0.00334	-1.664	45.482
MIZF	MA0131.1	Zinc-coordinating	BetaBetaAlpha-zinc finger	vertebrates	13.197	0.61	84	482	2364	26983	102	0.000672	2740	0.000708	-1.706	16.409
RREB1	MA0073.1	Zinc-coordinating	BetaBetaAlpha-zinc finger	vertebrates	22.278	0.623	66	500	1735	27612	76	0.001	2032	0.00105	-1.893	15.305
NHLH1	MA0048.1	Zipper-Type	Helix-Loop-Helix	vertebrates	14.132	0.674	214	352	6351	22996	374	0.00295	9804	0.00304	-1.917	39.99
MAX	MA0058.1	Zipper-Type	Helix-Loop-Helix	vertebrates	12.685	0.571	306	260	9779	19568	688	0.00453	17963	0.00464	-2.039	53.005
ELK1	MA0028.1	Winged Helix-Turn-Helix	Ets	vertebrates	8.812	0.568	447	119	16577	12770	2347	0.0155	60732	0.0157	-2.397	64.909
ESR1	MA0112.2	Zinc-coordinating	Hormone-nuclear Receptor	vertebrates	13.563	0.594	12	554	384	28963	13	0.000171	391	0.000202	-2.707	2.583
EWSR1-FLI1	MA0149.1	Winged Helix-Turn-Helix	Ets	vertebrates	32.871	0.554	7	559	230	29117	7	8.3e-05	232	0.000108	-3	1.806
RXR::RAR_DR5	MA0159.1	Zinc-coordinating	Hormone-nuclear Receptor	vertebrates	16.004	0.535	55	511	1570	27777	62	0.000694	1736	0.000763	-3.081	10.637
PLAG1	MA0163.1	Zinc-coordinating	BetaBetaAlpha-zinc finger	vertebrates	19.352	0.798	62	504	1757	27590	72	0.000664	2034	0.000736	-3.296	12.079
ESR2	MA0258.1	Zinc-coordinating	Hormone-nuclear Receptor	vertebrates	13.618	0.546	104	462	2785	26562	119	0.00141	3258	0.00152	-3.342	23.006
TP53	MA0106.1	Zinc-coordinating	Loop-Sheet-Helix	vertebrates	26.239	0.603	0	566	13	29334	0	0	13	6.72e-06	-3.351	0
YY1	MA0095.1	Zinc-coordinating	BetaBetaAlpha-zinc finger	vertebrates	8.101	0.51	526	40	22299	7048	7287	0.0288	188774	0.0293	-3.531	58.589
RORA_1	MA0071.1	Zinc-coordinating	Hormone-nuclear Receptor	vertebrates	13.19	0.424	336	230	11106	18241	825	0.00543	21879	0.00565	-3.655	55.305
RXRA::VDR	MA0074.1	Zinc-coordinating	Hormone-nuclear Receptor	vertebrates	20.451	0.527	18	548	561	28786	18	0.000178	576	0.000223	-3.781	3.558
Mycn	MA0104.2	Zipper-Type	Helix-Loop-Helix	vertebrates	11.104	0.699	316	250	9801	19546	759	0.005	20333	0.00525	-4.388	61.366
MYC::MAX	MA0059.1	Zipper-Type	Helix-Loop-Helix	vertebrates	14.237	0.602	133	433	4061	25286	186	0.00135	5224	0.00148	-4.423	21.012
NFE2L2	MA0150.1	Zipper-Type	Leucine Zipper	vertebrates	14.394	0.486	226	340	6923	22424	381	0.00276	10417	0.00296	-4.583	39.094
Klf4	MA0039.2	Zinc-coordinating	BetaBetaAlpha-zinc finger	vertebrates	12.618	0.771	461	105	16530	12817	3389	0.0223	88626	0.0229	-4.856	81.538
Myc	MA0147.1	Zipper-Type	Helix-Loop-Helix	vertebrates	11.157	0.686	312	254	9803	19544	742	0.00489	20133	0.0052	-5.442	57.746
ZNF354C	MA0130.1	Zinc-coordinating	BetaBetaAlpha-zinc finger	vertebrates	8.958	0.615	525	41	22153	7194	9033	0.0357	235773	0.0366	-5.731	59.777
ELK4	MA0076.1	Winged Helix-Turn-Helix	Ets	vertebrates	14.123	0.583	221	345	7189	22158	387	0.00229	10880	0.00253	-5.826	31.234
Pax5	MA0014.1	Helix-Turn-Helix	Homeo	vertebrates	12.432	0.575	42	524	1412	27935	49	0.000645	1549	0.000801	-6.783	5.386
REST	MA0138.2	Zinc-coordinating	BetaBetaAlpha-zinc finger	vertebrates	23.134	0.596	5	561	248	29099	5	6.91e-05	260	0.000141	-7.501	0.647
NFYA	MA0060.1	Other Alpha-Helix	NFY CCAAT-binding	vertebrates	12.925	0.523	231	335	6782	22565	371	0.00391	10427	0.00431	-7.585	45.577
Esrrb	MA0141.1	Zinc-coordinating	Hormone-nuclear Receptor	vertebrates	12.806	0.524	361	205	13135	16212	1142	0.00902	31133	0.00965	-7.964	43.278
znf143	MA0088.1	Zinc-coordinating	BetaBetaAlpha-zinc finger	vertebrates	17.541	0.53	49	517	1587	27760	52	0.000685	1726	0.000892	-8.572	6.826
GABPA	MA0062.2	Winged Helix-Turn-Helix	Ets	vertebrates	13.335	0.647	335	231	10958	18389	799	0.00579	22619	0.00643	-9.918	57.034
NR4A2	MA0160.1	Zinc-coordinating	Hormone-nuclear Receptor	vertebrates	10.165	0.491	472	94	18063	11284	2664	0.014	72677	0.015	-10.061	66.071
Myf	MA0055.1	Zipper-Type	Helix-Loop-Helix	vertebrates	15.914	0.609	353	213	12330	17017	1056	0.00834	29913	0.00928	-11.995	49.235
Zfx	MA0146.1	Zinc-coordinating	BetaBetaAlpha-zinc finger	vertebrates	13.077	0.749	331	235	10914	18433	1062	0.00979	29971	0.0108	-12.545	54.345
ZEB1	MA0103.1	Zinc-coordinating	BetaBetaAlpha-zinc finger	vertebrates	8.305	0.557	524	42	21674	7673	7040	0.0278	191707	0.0297	-13.886	67.031
